# Supplementary material
Source: PubMed Central journal article supplement (PMC2412072)
Supplement: NIHMS36949-supplement-supplement_1.pdf [file NIHMS36949-supplement-supplement_1.pdf]

Table S-1. Selected examples of accepted spectra of single-peptide identifications in the inner medullary collecting ducts (IMCDs).

| Protein name <sup>a</sup>                                                             | Charge +1 <sup>b</sup>                                                              | Charge +2                                                                            | Charge +3                                                                             | Confirmed <sup>c</sup> |
|---------------------------------------------------------------------------------------|-------------------------------------------------------------------------------------|--------------------------------------------------------------------------------------|---------------------------------------------------------------------------------------|------------------------|
| Fixed perfusion-biotinylated IMCDs                                                    |                                                                                     |                                                                                      |                                                                                       |                        |
| ACE<br>R.VAEFFFTSLGLSPM*PPEF<br>WAESMLEK#.P<br>Xcorr: 2.8; $\Delta$ Cn: 0.1; Rsp: 5   | 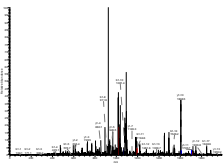   |    |    | RT-PCR                 |
| APC<br>R.NDSLSSLDFFFFDVLDR<br>EK.A<br>Xcorr: 3.0; $\Delta$ Cn: 0.2; Rsp: 6            |    |    |    | Negative               |
| Calcyclin<br>K.LQDAEIAR.L<br>Xcorr: 2.5; $\Delta$ Cn: 0.4; Rsp: 1                     |    |    |    | RT-PCR                 |
| CD40LG<br>K.REGLYYVYTQVTFCSNR.<br>E<br>Xcorr: 3.0; $\Delta$ Cn: 0.2; Rsp: 1           |   |   |   | Negative               |
| CLIC4<br>K.NSRPEANEALERGLLK.T<br>Xcorr: 2.8; $\Delta$ Cn: 0.1; Rsp: 1                 |  |  |  | RT-PCR                 |
| ERC2<br>K.IAELESLTLR.H<br>Xcorr: 3.41; $\Delta$ Cn: 0.4; Rsp: 3                       |  |  |  | Negative               |
| g H/K ATPase $\alpha$ 1<br>K.RIVIGDASETALLK.F<br>Xcorr: 3.9; $\Delta$ Cn: 0.5; Rsp: 1 |  |  |  | IF                     |
| GPR64<br>K.EDSCNGKSRMALR.R<br>Xcorr: 2.7; $\Delta$ Cn: 0.1; Rsp: 8                    |  |  |  | RT-PCR                 |

GRIN2D  
R.YWSVDKLGGR.A  
Xcorr: 2.5;  $\Delta$ Cn: 0.3; Rsp: 1

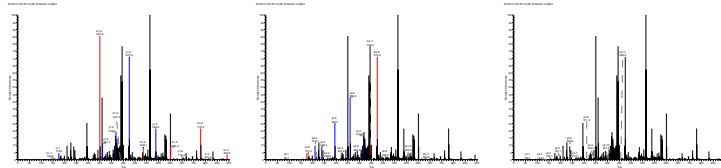

Negative

HCN1  
R.LGTPPGGAAGK#.E  
Xcorr: 2.9;  $\Delta$ Cn: 0.2; Rsp: 2

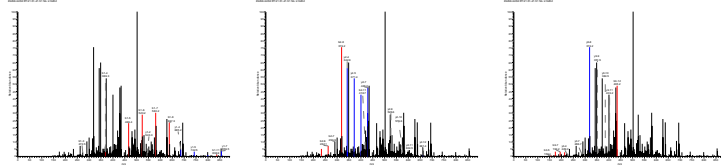

Negative

Kv4.3  
K.ELPCGERYSVAFFCLDTA  
CVMIFTVEYLLR.L  
Xcorr: 3.2;  $\Delta$ Cn: 0.3; Rsp: 2

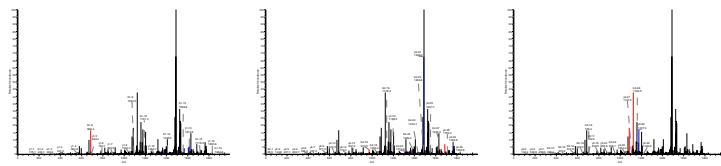

Negative

LPL  
K.GLGDVDQLVK#.C  
Xcorr: 2.1;  $\Delta$ Cn: 0.1; Rsp: 1

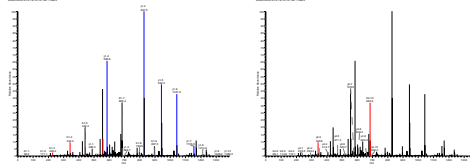

RT-PCR

LRP4  
K.FTGKNQEIR.N  
Xcorr: 2.2;  $\Delta$ Cn: 0.1; Rsp: 7

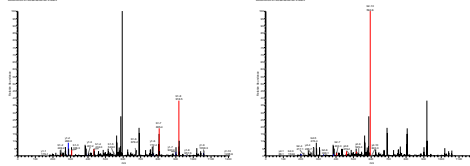

RT-PCR

MAPK12  
K.GLKYIHAAGVIHRDLK.P  
Xcorr: 3.0;  $\Delta$ Cn: 0.3; Rsp: 3

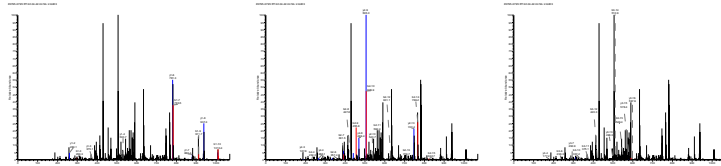

Negative

NHE2  
K.EGGTQTPGVLR.Q  
Xcorr: 2.4;  $\Delta$ Cn: 0.2; Rsp: 6

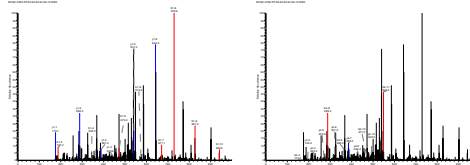

IF

PalmT  
R.KM\*DHHCPWVNNCVGE  
K.N  
Xcorr: 2.2;  $\Delta$ Cn: 0.2; Rsp: 3

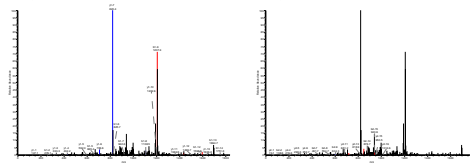

RT-PCR

PIK3-C2 $\gamma$   
R.DACSYFTSNALPLK.I  
Xcorr: 2.4;  $\Delta$ Cn: 0.5; Rsp: 10

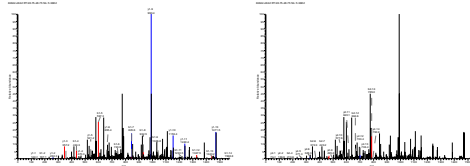

Negative

PIK3-C $\beta$   
 K.TVVSSEISGKNDHIWNEQ  
 LEFDINICDLPR.M  
 Xcorr: 2.6;  $\Delta$ Cn: 0.2; Rsp: 4

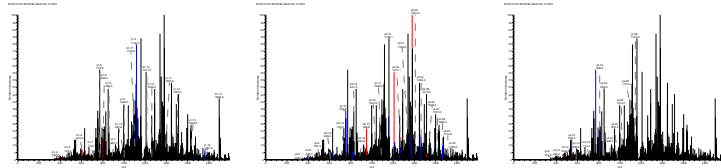

RT-PCR

PKA- $\beta$ C  
 M\*GNTAIAKKGSEVESVK.E  
 Xcorr: 2.8;  $\Delta$ Cn: 0.3; Rsp: 1

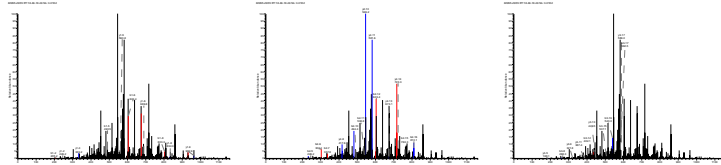

RT-PCR

Rab31  
 K.WVKELKEHGPENIVM\*AI  
 AGNK.C  
 Xcorr: 3.1;  $\Delta$ Cn: 0.2; Rsp: 1

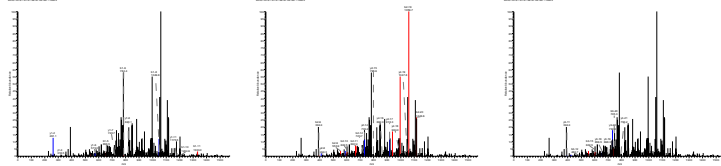

RT-PCR

Rabaptin-5  
 R.QWREEVASLQAVMK#.E  
 Xcorr: 2.8;  $\Delta$ Cn: 0.1; Rsp: 7

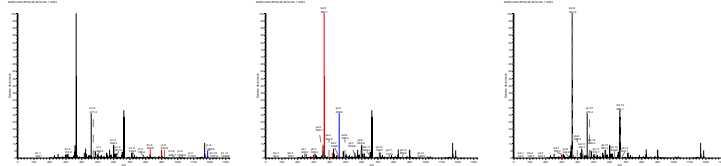

RT-PCR

S1P-R  
 R.SPSAVGPSGGGLR.R  
 Xcorr: 2.8;  $\Delta$ Cn: 0.2; Rsp: 4

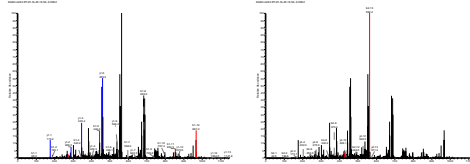

Negative

SCN5A  
 R.TSLLVPWPLR.H  
 Xcorr: 2.8;  $\Delta$ Cn: 0.2; Rsp: 1

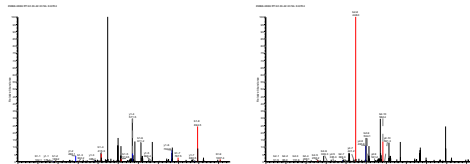

Negative

Septin-9  
 R.VDLGAK.A  
 Xcorr: 1.8;  $\Delta$ Cn: 0.2; Rsp: 1

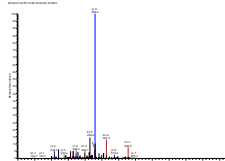

RT-PCR

SNAP29  
 K.MDQDLKM\*SQK.H  
 Xcorr: 2.2;  $\Delta$ Cn: 0.2; Rsp: 6

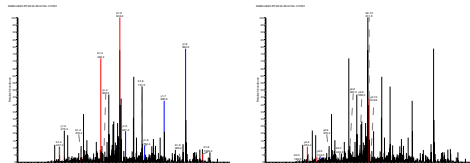

RT-PCR

TauT  
 R.GLTLPGAGEGIK.F  
 Xcorr: 2.1;  $\Delta$ Cn: 0.1; Rsp: 3

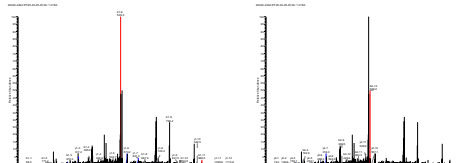

IF

THIK-1  
R.LSGEMISMK.D  
Xcorr: 2.1;  $\Delta$ Cn: 0.3; Rsp: 2

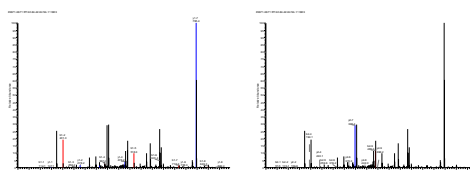

RT-PCR

TYRO3  
R.LPIPM\*VILPFMK#.H  
Xcorr: 2.5;  $\Delta$ Cn: 0.2; Rsp: 4

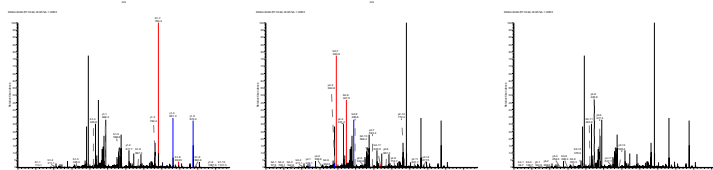

RT-PCR

VK $\gamma$ C  
R.TKLQDIK.S  
Xcorr: 2.3;  $\Delta$ Cn: 0.1; Rsp: 1

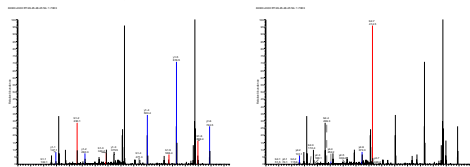

RT-PCR

WASPIP  
R.SGPLPPPPINR.N  
Xcorr: 2.4;  $\Delta$ Cn: 0.2; Rsp: 7

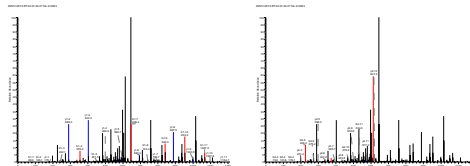

RT-PCR

---

Fixed incubation-biotinylated IMCDs

---

FZD1  
K.VYGLMYFGPEELR.F  
Xcorr: 4.0; 0.6;  $\Delta$ Cn: Rsp: 1

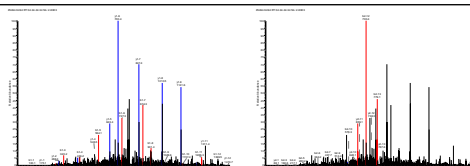

RT-PCR

ROMK K.RGGKLCLLIR.V  
Xcorr: 2.5;  $\Delta$ Cn: 0.1; Rsp: 1

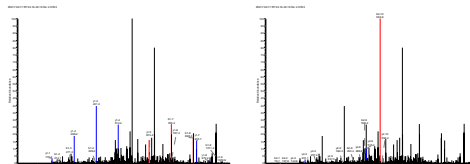

RT-PCR

Podocalyxin  
K.ASFKPAEDSCALELAPILD  
NQAVAVK.R  
Xcorr: 3.3;  $\Delta$ Cn: 0.4; Rsp: 1

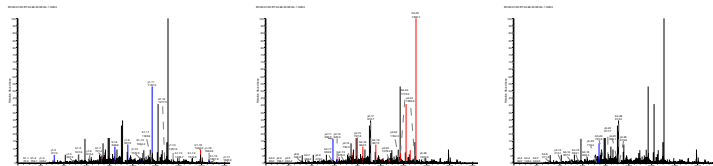

RT-PCR

---

Non-fixed perfusion-biotinylated IMCDs

---

CA4  
K.NQQSPINIVTSK.T  
Xcorr: 3.1;  $\Delta$ Cn: 0.4; Rsp: 1

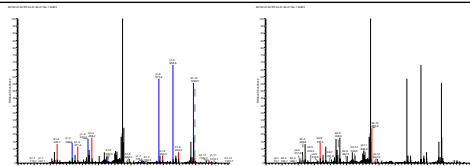

RT-PCR

CD59  
R.LEIANVQYR.C  
Xcorr: 3.5;  $\Delta$ Cn: 0.5; Rsp: 1

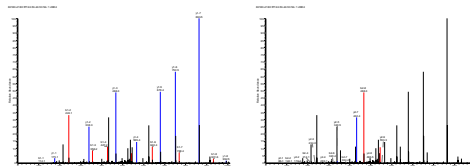

RT-PCR

---

 Non-fixed incubation-biotinylated IMCDs
 

---

CD166  
 TASKHVNKDLGNMEENK  
 Xcorr: 2.9;  $\Delta$ Cn: 0.6; Rsp: 1

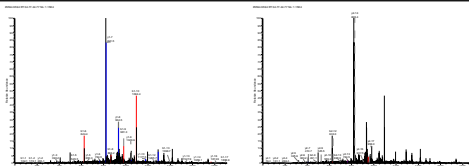

RT-PCR

MCT2  
 K.VSNTHNPPSDRDKESSI.-  
 Xcorr: 3.2;  $\Delta$ Cn: 0.4; Rsp: 1

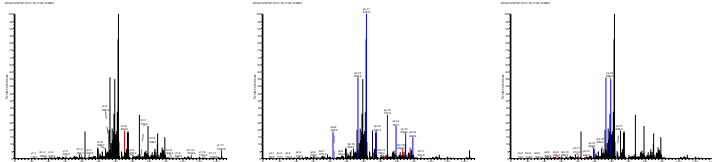

RT-PCR

VAPA  
 K.GPFTDVVTTNLK.L  
 Xcorr: 3.9;  $\Delta$ Cn: 0.4; Rsp: 1

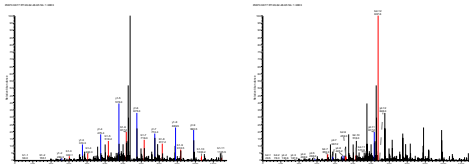

RT-PCR

---

a. Identified proteins are abbreviated. The identified peptide sequence is shown with corresponding Xcorr,  $\Delta$ Cn, and Rsp scores. \* indicated methionine (M) oxidation. # indicates lysine (K) biotinylation. b. Accepted spectra of three charged states are shown. Color red indicates matches to b-ion series; blue indicates matched to y-ion series. c. Protein identifications were confirmed in IMCDs with immunofluorescence staining (IF) or RT-PCR. “Negative“ indicates no RT-PCR product at 30 cycles of amplification.

Table S-2. Proteins identified from the fixed perfusion-biotinylated inner medullary collecting ducts (IMCDs).

| Protein name                                             | Gene name | Accession | Ion (n) <sup>a</sup> | CDDB family <sup>b</sup>                           | Type <sup>c</sup> | Confirmed <sup>d</sup> |
|----------------------------------------------------------|-----------|-----------|----------------------|----------------------------------------------------|-------------------|------------------------|
| 14-3-3 protein zeta/delta                                | YWHAZ     | P63102    | 6 (15)               | Signaling proteins                                 |                   |                        |
| 3-hydroxyanthranilate 3,4-dioxygenase                    | HAAO      | P46953    | 1 (1)                | Biosynthetic proteins                              |                   |                        |
| 6-phosphofructo-2-kinase/fructose-2,6-biphosphatase 1    | PFKFB1    | P07953    | 1 (1)                | Metabolism proteins                                |                   |                        |
| Acetyl-CoA carboxylase 1                                 | ACACA     | P11497    | 1 (1)                | Metabolism proteins                                |                   |                        |
| Activity-dependent neuroprotector                        | ADNP      | Q9JKL8    | 1 (1)                | Nuclear proteins                                   |                   |                        |
| Adenomatous polyposis coli protein                       | APC       | P70478    | 1 (12)               | Signaling proteins                                 |                   |                        |
| Alcohol dehydrogenase                                    | AKR1A1    | P51635    | 2 (2)                | Metabolism proteins                                |                   |                        |
| Alpha-1-antitrypsin precursor                            | SERPINA1  | P17475    | 10 (12)              | Secreted proteins                                  |                   |                        |
| Alpha-actinin-4                                          | ACTN4     | Q9QXQ0    | 5 (9)                | Cytoskeletal proteins and linkers/molecular motors |                   |                        |
| Aminopeptidase N                                         | ANPEP     | P15684    | 2 (4)                | Aminopeptidases                                    | II                |                        |
| Angiotensin-converting enzyme, somatic isoform precursor | ACE       | P47820    | 1 (2)                | Signaling proteins                                 | I                 | RT-PCR                 |
| Annexin A1                                               | ANXA1     | P07150    | 5 (16)               | Membrane trafficking proteins                      |                   |                        |
| Annexin A2                                               | ANXA2     | Q07936    | 7 (15)               | Membrane trafficking proteins                      |                   |                        |
| Aspartate aminotransferase, cytoplasmic                  | GOT1      | P13221    | 1 (14)               | Metabolism proteins                                |                   |                        |
| ATP-binding cassette sub-family A member 2               | ABCA2     | Q9ESR9    | 2 (3)                | Transporters and channels                          | III               |                        |
| Baculoviral IAP repeat-containing protein 4              | BIRC4     | Q9R0I6    | 1 (7)                | Apoptosis proteins                                 |                   |                        |
| Bassoon protein                                          | BSN       | O88778    | 2 (4)                | Cytoskeletal proteins and linkers/molecular motors |                   |                        |
| Beta-glucuronidase precursor                             | GUSB      | P06760    | 20 (67)              | Protein degradation pathway                        |                   |                        |
| Bone morphogenetic protein 4 precursor                   | BMP4      | Q06826    | 1 (1)                | Secreted proteins                                  |                   |                        |

|                                                             |        |        |        |                                                    |     |        |
|-------------------------------------------------------------|--------|--------|--------|----------------------------------------------------|-----|--------|
| Calcyclin                                                   | S100A6 | P05964 | 1 (1)  | Binding proteins                                   |     | RT-PCR |
| cAMP-dependent protein kinase, beta-catalytic subunit       | PRKACB | P68182 | 1 (3)  | Protein kinases, serine/threonine                  |     | RT-PCR |
| Catalase                                                    | CAT    | P04762 | 1 (1)  | Stress proteins                                    |     |        |
| CD40 ligand                                                 | CD40LG | Q9Z2V2 | 1 (12) | Signaling proteins                                 | II  |        |
| Chloride intracellular channel protein 4                    | CLIC4  | Q9Z0W7 | 1 (1)  | Transporters and channels                          | III | RT-PCR |
| COUP transcription factor 2                                 | NR2F2  | O09018 | 1 (1)  | Nuclear receptors                                  |     |        |
| Creatine kinase M-type                                      | CKM    | P00564 | 1 (1)  | Metabolism proteins                                |     |        |
| Creatine kinase, sarcomeric mitochondrial precursor         | CKMT2  | P09605 | 3 (12) | Metabolism proteins                                |     |        |
| Cytochrome P450 4B1                                         | CYP4B1 | P15129 | 1 (1)  | Metabolism proteins                                |     |        |
| Cytosolic acyl coenzyme A thioester hydrolase               | ACOT7  | Q64559 | 1 (2)  | Metabolism proteins                                |     |        |
| Dihydropyrimidinase-related protein 1                       | CRMP1  | Q62950 | 1 (7)  | Miscellaneous proteins                             |     |        |
| Double-strand break repair protein MRE11A                   | MRE11A | Q9JIM0 | 1 (1)  | Nuclear proteins                                   |     |        |
| ERC protein 2                                               | ERC2   | Q8K3M6 | 1 (9)  | Cytoskeletal proteins and linkers/molecular motors |     |        |
| Ficolin-2 precursor                                         | FCN2   | P57756 | 1 (1)  | Secreted proteins                                  |     |        |
| Focal adhesion kinase 1                                     | PTK2   | O35346 | 1 (1)  | Protein kinases, tyrosine                          |     |        |
| Fos-related antigen 2                                       | FOSL2  | P51145 | 1 (1)  | Nuclear proteins                                   |     |        |
| Glandular kallikrein-7, submandibular/renal precursor       | KLK7   | P36373 | 2 (4)  | Protein degradation pathway                        |     |        |
| Glial fibrillary acidic protein, astrocyte                  | GFAP   | P47819 | 3 (77) | Cytoskeletal proteins and linkers/molecular motors |     |        |
| Glutamate [NMDA] receptor subunit epsilon 4 precursor       | GRIN2D | Q62645 | 1 (1)  | Membrane receptors                                 | III |        |
| Glyceraldehyde-3-phosphate dehydrogenase                    | GAPDH  | P04797 | 1 (1)  | Metabolism proteins                                |     |        |
| Glycerol-3-phosphate dehydrogenase, mitochondrial precursor | GPD2   | P35571 | 2 (5)  | Metabolism proteins                                |     |        |

|                                                              |          |        |         |                                                    |     |        |
|--------------------------------------------------------------|----------|--------|---------|----------------------------------------------------|-----|--------|
| G-protein coupled receptor 64 precursor                      | GPR64    | Q8CJ11 | 1 (1)   | Membrane receptors                                 | III | RT-PCR |
| Hermansky-Pudlak syndrome 6 protein homolog                  | HPS6     | Q7M733 | 2 (2)   | Miscellaneous proteins                             |     |        |
| Hexokinase-1                                                 | HK1      | P05708 | 2 (2)   | Metabolism proteins                                |     |        |
| Histone H2B                                                  |          | Q00715 | 2 (2)   | Nuclear proteins                                   |     |        |
| Histone H4                                                   | HIST1H4B | P62804 | 3 (12)  | Nuclear proteins                                   |     |        |
| Hydroxymethylglutaryl-CoA synthase, mitochondrial precursor  | HMGCS2   | P22791 | 1 (1)   | Metabolism proteins                                |     |        |
| Keratin, type I cytoskeletal 19                              | KRT19    | Q63279 | 15 (81) | Cytoskeletal proteins and linkers/molecular motors |     |        |
| Keratin, type II cytoskeletal 8                              | KRT8     | Q10758 | 2 (9)   | Cytoskeletal proteins and linkers/molecular motors |     |        |
| Lamin-A                                                      | LMNA     | P48679 | 3 (3)   | Nuclear proteins                                   |     |        |
| Lipoprotein lipase precursor                                 | LPL      | Q06000 | 1 (1)   | Metabolism proteins                                | GPI | RT-PCR |
| Long-chain fatty acid transport protein 1                    | SLC27A1  | P97849 | 1 (1)   | Transporters and channels (related)                |     |        |
| Low-density lipoprotein receptor-related protein 4 precursor | LRP4     | Q9QYP1 | 1 (1)   | Membrane receptors                                 | I   | RT-PCR |
| Mitogen-activated protein kinase 12                          | MAPK12   | Q63538 | 1 (1)   | Protein kinases, serine/threonine                  |     | RT-PCR |
| Moesin                                                       | MSN      | O35763 | 2 (2)   | Cytoskeletal proteins and linkers/molecular motors |     |        |
| Myosin heavy chain, cardiac muscle beta isoform              | MYH7     | P02564 | 1 (1)   | Cytoskeletal proteins and linkers/molecular motors |     |        |
| Myosin Ib                                                    | MYO1A    | Q05096 | 1 (1)   | Cytoskeletal proteins and linkers/molecular motors |     |        |
| Myosin-5A                                                    | MYO5A    | Q9QYF3 | 3 (10)  | Cytoskeletal proteins and linkers/molecular motors |     |        |



|                                                                                  |         |        |        |                                                    |     |        |
|----------------------------------------------------------------------------------|---------|--------|--------|----------------------------------------------------|-----|--------|
| Myosin-9                                                                         | MYH9    | Q62812 | 3 (5)  | Cytoskeletal proteins and linkers/molecular motors |     |        |
| Neurofilament triplet H protein                                                  | NEFH    | P16884 | 4 (14) | Cytoskeletal proteins and linkers/molecular motors |     |        |
| Nitric oxide synthase, inducible                                                 | NOS2    | Q06518 | 1 (24) | Signaling proteins                                 |     |        |
| Nitric-oxide synthase, brain                                                     | NOS1    | P29476 | 3 (10) | Signaling proteins                                 |     |        |
| Nucleolar transcription factor 1                                                 | UBTF    | P25977 | 1 (2)  | Transcription factors                              |     |        |
| Oligonucleotide/oligosaccharide-binding fold-containing protein 1                | OBFC1   | Q6AYD2 | 1 (3)  | Miscellaneous proteins                             |     |        |
| Palmitoyltransferase ZDHHC7                                                      | ZDHHC7  | Q923G5 | 1 (1)  | Biosynthetic proteins                              | III | RT-PCR |
| Pancreatic alpha-amylase precursor                                               |         | P00689 | 1 (2)  | Secreted proteins                                  |     |        |
| PDZ domain-containing RING finger protein 3                                      | PDZRN3  | P68907 | 3 (4)  | Miscellaneous proteins                             |     |        |
| Peroxiredoxin-1                                                                  | PRDX1   | Q63716 | 3 (5)  | Stress proteins                                    |     |        |
| Peroxiredoxin-2                                                                  | PRDX2   | P35704 | 2 (2)  | Stress proteins                                    |     |        |
| Phosphatidylinositol-4,5-bisphosphate 3-kinase catalytic subunit beta isoform    | PIK3CB  | Q9Z1L0 | 1 (1)  | Signaling proteins                                 |     | RT-PCR |
| Phosphatidylinositol-4-phosphate 3-kinase C2 domain-containing gamma polypeptide | PIK3C2G | O70173 | 1 (1)  | Signaling proteins                                 |     |        |
| Phosphorylase b kinase gamma catalytic chain, testis/liver isoform               | PHKG2   | P31325 | 1 (1)  | Protein kinases, serine/threonine                  |     |        |
| Potassium channel subfamily K member 13, THIK-1                                  | KCNK13  | Q9ERS0 | 1 (1)  | Transporters and channels                          | III | RT-PCR |
| Potassium voltage-gated channel subfamily D member 3, Kv4.3                      | KCND3   | Q62897 | 1 (7)  | Transporters and channels                          | III |        |
| Potassium/sodium hyperpolarization-activated cyclic nucleotide-gated channel 1   | HCN1    | Q9JKB0 | 1 (3)  | Transporters and channels                          | III |        |
| Potassium-transporting ATPase alpha chain 1                                      | ATP4A   | P09626 | 1 (14) | Ion pumps                                          | III | IF     |
| Propionyl-CoA carboxylase alpha chain, mitochondrial precursor                   | PCCA    | P14882 | 6 (11) | Metabolism proteins                                |     |        |
| Propionyl-CoA carboxylase beta chain, mitochondrial precursor                    | PCCB    | P07633 | 5 (8)  | Metabolism proteins                                |     |        |
| Prostatic acid phosphatase precursor                                             | ACPP    | P20646 | 1 (2)  | Miscellaneous proteins                             |     |        |

|                                                                 |         |        |       |                                                    |     |        |
|-----------------------------------------------------------------|---------|--------|-------|----------------------------------------------------|-----|--------|
| Prostatic spermine-binding protein precursor                    | SBP     | P08723 | 1 (5) | Secreted proteins                                  |     |        |
| Protein piccolo                                                 | PCLO    | Q9JKS6 | 2 (8) | Cytoskeletal proteins and linkers/molecular motors |     |        |
| Protein-arginine deiminase type-1                               | PADI1   | O88806 | 1 (7) | Protein degradation pathway                        |     |        |
| Rab GTPase-binding effector protein 1                           | RABEP1  | O35550 | 1 (2) | Small GTP binding proteins and related proteins    |     | RT-PCR |
| Ras-related protein Rab-31                                      | RAB31   | Q6GQP4 | 1 (4) | Small GTP binding proteins and related proteins    |     | RT-PCR |
| Ribosome recycling factor, mitochondrial precursor              | MRRF    | Q5RKI9 | 1 (1) | Biosynthetic proteins                              |     |        |
| RNA-binding protein 10                                          | RBM10   | P70501 | 1 (1) | Nuclear proteins                                   |     |        |
| Septin-9                                                        | SEPT9   | Q9QZR6 | 1 (4) | Cytoskeletal proteins and linkers/molecular motors |     | RT-PCR |
| Serine protease inhibitor Kazal-type 2 precursor                | SPINK2  | Q6IE49 | 1 (4) | Secreted proteins                                  |     |        |
| Serine/threonine-protein kinase Nek6                            | NEK6    | P59895 | 1 (1) | Protein kinases, serine/threonine                  |     |        |
| Serine/threonine-protein kinase receptor R3 precursor           | ACVRL1  | P80203 | 2 (5) | Membrane receptors                                 | I   | IF     |
| Serum albumin precursor                                         | ALB     | P02770 | 2 (3) | Secreted proteins                                  |     |        |
| Signal-induced proliferation-associated 1-like protein 1, SPA-1 | SIPA1L1 | O35412 | 2 (2) | Small GTP binding proteins and related proteins    |     |        |
| Sodium- and chloride-dependent taurine transporter              | SLC6A6  | P31643 | 1 (3) | Transporters and channels                          | III | IF     |
| Sodium channel protein type 5 alpha subunit                     | SCN5A   | P15389 | 1 (5) | Transporters and channels                          | III |        |
| Sodium/hydrogen exchanger 2                                     | SLC9A2  | P48763 | 1 (1) | Transporters and channels                          | III | IF     |
| Somatotropin precursor                                          | GH1     | P01244 | 1 (1) | Secreted proteins                                  |     |        |

|                                                           |          |        |             |                                                    |     |        |
|-----------------------------------------------------------|----------|--------|-------------|----------------------------------------------------|-----|--------|
| Spectrin alpha chain, brain                               | SPTAN1   | P16086 | 81<br>(157) | Cytoskeletal proteins and linkers/molecular motors |     |        |
| Sphingosine 1-phosphate receptor Edg-8                    | EDG8     | Q9JKM5 | 1 (3)       | Membrane receptors                                 | III |        |
| Synaptosomal-associated protein 29                        | SNAP29   | Q9Z2P6 | 1 (1)       | Membrane trafficking proteins                      |     | RT-PCR |
| Synaptotagmin-like protein 4                              | SYTL4    | Q8VHQ7 | 3 (9)       | Membrane trafficking proteins                      |     |        |
| Syntaxin-8                                                | STX8     | Q9Z2Q7 | 2 (2)       | Membrane trafficking proteins                      | II  |        |
| Terminal deoxynucleotidyltransferase-interacting factor 1 | DNTTIP1  | Q91Y53 | 1 (2)       | Nuclear proteins                                   |     |        |
| Thioredoxin reductase 2, mitochondrial precursor          | TXNRD2   | Q9Z0J5 | 1 (1)       | Stress proteins                                    |     |        |
| Timeless homolog                                          | TIMELESS | Q9Z2Y1 | 2 (2)       | Nuclear proteins                                   |     |        |
| Transcription initiation factor IIF beta subunit          | GTF2F2   | Q01750 | 1 (1)       | Nuclear proteins                                   |     |        |
| Transforming growth factor beta-3 precursor               | TGFB3    | Q07258 | 1 (2)       | Secreted proteins                                  |     |        |
| Transmembrane protease, serine 9                          | TMPRSS9  | P69526 | 2 (6)       | Metabolism proteins                                | II  |        |
| Triosephosphate isomerase                                 | TPI1     | P48500 | 4 (6)       | Metabolism proteins                                |     |        |
| Tyrosine-protein kinase receptor TYRO3 precursor          | TYRO3    | P55146 | 1 (1)       | Membrane receptors                                 | I   | RT-PCR |
| Vitamin K-dependent gamma-carboxylase                     | GGCX     | O88496 | 1 (1)       | Biosynthetic proteins                              | III | RT-PCR |
| Wiskott-Aldrich syndrome protein-interacting protein      | WASPIP   | Q6IN36 | 1 (1)       | Cytoskeletal proteins and linkers/molecular motors |     | RT-PCR |
| Xanthine dehydrogenase/oxidase                            | XDH      | P22985 | 1 (7)       | Metabolism proteins                                |     |        |

a, Number of peptides identified with their total hit number in the parenthesis; b, Collecting duct database (CDDB) family group names; c, Membrane protein types: I, one membrane spanning helix with an extracellular N<sup>7</sup>-terminus; II, one membrane spanning helix with an extracellular C<sup>7</sup>-terminus; III, multiple membrane spanning helices; GPI, glycosylphosphatidylinositol-linked; d, Protein identifications confirmed by Immunofluorescence staining (IF) or RT-PCR.

Table S-3. RT-PCR primer sequences used to examine mRNA expression of single-peptide identifications in the inner medullary collecting ducts (IMCDs).

| Protein name                                                                   | Gene name | 5' primer <sup>a</sup>          | Exon <sup>b</sup> | 3' primer <sup>a</sup>       | Exon <sup>b</sup> |
|--------------------------------------------------------------------------------|-----------|---------------------------------|-------------------|------------------------------|-------------------|
| Angiotensin-converting enzyme                                                  | ACE       | ATGCCATGAAGTTGGGCT<br>AC        | 24                | AGTTGACGCGACTGGACT<br>CT     | 25                |
| Adenomatous polyposis coli protein                                             | APC       | ATGGCCTTGACAAACCTG<br>AC        | 11                | TCCAAAGCACATTCCATC<br>AA     | 13                |
| Aquaporin-2                                                                    | AQP2      | GACTGTGCTTAGTGCATC<br>TCATTTTAT | 4                 | AGGATCATGCAAACCTCTG<br>TTCGT | 4                 |
| Carbonic anhydrase 4 precursor                                                 | CA4       | ATCTGCCCACCCAGTACA<br>AG        | 4                 | AGCCCTCGTTTACCTCGT<br>TT     | 6                 |
| Calcyclin                                                                      | S100A6    | AAGGAGGGTGACAAGCA<br>CAC        | 2                 | AGATCATCCATCAGCCTT<br>GC     | 3                 |
| CD166 antigen precursor                                                        | ALCAM     | CTTGCACAGCAGAAAAC<br>CAA        | 12                | GAGGAGGAGACCAACCA<br>CAA     | 14                |
| CD40 ligand                                                                    | CD40LG    | TGAGGCCAACAGTAATG<br>CAG        | 4                 | ATTCGCTGCCCTGAGTAA<br>GA     | 5                 |
| CD59 glycoprotein precursor                                                    | CD59      | CTCGGAGGGGATTCATCT<br>TA        | 1                 | CCGGATACAGCAACAAG<br>ACA     | 2                 |
| Chloride intracellular channel protein 4                                       | CLIC4     | GCGACGAGATGACATTA<br>GCA        | 5                 | CTCTTGGCGACGTCACTG<br>TA     | 6                 |
| ERC protein 2                                                                  | ERC2      | TTGCAGACCGACTGAAA<br>CAG        | 10                | TTCTCCAGCTGTTGGTTG<br>TG     | 12                |
| Frizzled 1 precursor                                                           | FZD1      | CATCACATCAGGCTTCTG<br>GA        | 1                 | AGTGACTAGGCTTGGCA<br>GGA     | 1                 |
| Glutamate [NMDA] receptor subunit epsilon 4                                    | GRIN2D    | TCTTCGCGGTCATCTTTC<br>TT        | 8                 | CCACTCTCGGCTGGTTGT<br>AT     | 9                 |
| G-protein coupled receptor 64 precursor                                        | GPR64     | TTTTGCTGGATCAACAGC<br>AG        | 15                | AAGGCAAAGCCCCAAGT<br>AAT     | 17                |
| Potassium/sodium hyperpolarization-activated cyclic nucleotide-gated channel 1 | HCN1      | CAGCATGTCTGACCTCTG<br>GA        | 4                 | TATCTTCTGGCGCATGTC<br>AG     | 5                 |

|                                                                                  |         |                         |       |                       |    |
|----------------------------------------------------------------------------------|---------|-------------------------|-------|-----------------------|----|
| Potassium voltage-gated channel subfamily D member 3, Kv4.3                      | KCND3   | GGCTACACCCTGAAGAGCTG    | 1     | GCCAAATATCTTCCCAGCAA  | 2  |
| Lipoprotein lipase                                                               | LPL     | AACATTGGAGAAGCCATTCG    | 5     | CAGAGCCCTTTCTCAAATGC  | 6  |
| Low-density lipoprotein receptor-related protein 4                               | LRP4    | TGTCAGCTACGCCGTTGGTGGAC | 36    | CACTTCCTGAGTGGAAGTTCG | 37 |
| Mitogen-activated protein kinase 12                                              | MAPK12  | GCTGTGAACGAGGACTGTGA    | 6     | AGCCAACAGACCAAATGTCC  | 8  |
| Monocarboxylate transporter 2, MCT2                                              | SLC16A7 | TGTCTTATGGACCAGGTTGG    | 3     | CACGACTATCCCCTGCGCTA  | 4  |
| Palmitoyltransferase ZDHHC7                                                      | ZDHHC7  | GTGGGTGAACAACACTGTGTGG  | 5     | TGACTGCGGTGAAAGTGAAG  | 7  |
| Phosphatidylinositol-4-phosphate 3-kinase C2 domain-containing gamma polypeptide | PIK3C2G | GCAGAGTCTGGAGTGCTTCC    | 29    | CTGCTCGAAGGACTTTTTGG  | 30 |
| Phosphatidylinositol-4,5-bisphosphate 3-kinase catalytic subunit beta isoform    | PIK3CB  | TGAGGTTGTGAGCACCTCTG    | 18    | TCACCAATGCCAAGGACATA  | 19 |
| cAMP-dependent protein kinase, beta-catalytic subunit                            | PRKACB  | ACCCCATGCTCGTTTCTATG    | 6     | CTTGACTCTCTTGGCGAACCC | 7  |
| Podocalyxin precursor                                                            | PODXL   | GGCTGTGTTTGAAGCTGCTGA   | 6     | CTGTCTGCAGCTCCTCTGTG  | 8  |
| Ras-related protein Rab-31                                                       | RAB31   | TGGGTTAAGGAGCTGAAGGA    | 5     | GCCACTGTTTCCGTTTTTCAT | 7  |
| Rabaptin-5, Rab GTPase-binding effector protein 1                                | RABEP1  | ACTGCTGCTAAGGCCACTGT    | 16-17 | TGTCATGTCTCAGGGAGCTG  | 18 |

|                                                          |        |                          |    |                           |       |
|----------------------------------------------------------|--------|--------------------------|----|---------------------------|-------|
| ATP-sensitive inward rectifier potassium channel 1       | KCNJ1  | TGTGGATGCACAGTCAA<br>GGT | 2  | GTCAGGCGGGTAGAACT<br>CTG  | 5     |
| Sphingosine 1-phosphate receptor Edg-8                   | EDG8   | ACACCTTCACCAACCGAG<br>AC | 1  | GGGGACACGAGTGTCT<br>GAT   | 1     |
| Sodium channel protein type 5 alpha subunit              | SCN5A  | AACCAGACAGAAGGGGA<br>CCT | 24 | GCTGCTCCTCATACCCTC<br>TG  | 25-26 |
| Septin-9                                                 | SEPT9  | AAGAAACGCATCCCTGA<br>CAC | 6  | ATACCGTTGGACAGCAG<br>GTC  | 7     |
| Synaptosomal-associated protein 29                       | SNAP29 | ATGTGGAAGACGAGGAC<br>ACC | 1  | GTCCACCATCTTCTCCGT<br>GT  | 2     |
| Potassium channel subfamily K member 13, THIK-1          | KCNK13 | GGCTCATCCTGCTTTACC<br>TG | 1  | CACTGTGCCACGAAGTA<br>GA   | 1     |
| Tyrosine-protein kinase receptor TYRO3                   | TYRO3  | CATCCTGCTTCGGAAGAG<br>AC | 10 | TCCTCCAGCTTCTCCTTC<br>AA  | 12    |
| Vesicle-associated membrane protein-associated protein A | VAPA   | TTGCTCCACCAAACATTT<br>CA | 3  | AGTCGCTTGC ACTCTTCC<br>AT | 5     |
| Vitamin K-dependent gamma-carboxylase                    | GGCX   | AACCTTTCTGAGACGGCA<br>GA | 14 | GGTTCAAATGGTCGCAA<br>GTT  | 15    |
| Wiskott-Aldrich syndrome protein-interacting protein     | WASPIP | TACACCTCCCTTGCTTC<br>AC  | 5  | CTGGGACTGTCCATTCCA<br>CT  | 6     |

a, Primers were selected using an online software Primer3 ([http://frodo.wi.mit.edu/cgi-bin/primer3/primer3\\_www.cgi](http://frodo.wi.mit.edu/cgi-bin/primer3/primer3_www.cgi)) from the Whitehead Institute for Biomedical Research. Each pair frames at least one intron to avoid amplification of genomic DNA, except those for FZD1, EDG8, and KCNK13 that have one single exon. b, Numbers indicate primer locations on the exons. Information of the transcripts was obtained from Ensembl *Rattus norvegicus* database ([http://www.ensembl.org/Rattus\\_norvegicus/index.html](http://www.ensembl.org/Rattus_norvegicus/index.html)).

Table S-4. Proteins identified from the fixed incubation-biotinylated inner medullary collecting ducts (IMCDs).

| Protein name                        | Gene name | Accession | Ion (n) <sup>a</sup> | CDDB family <sup>b</sup>                        | Type <sup>c</sup> | Confirmed <sup>d</sup> |
|-------------------------------------|-----------|-----------|----------------------|-------------------------------------------------|-------------------|------------------------|
| 14-3-3 protein eta                  | YWHAH     | P68511    | 2 (9)                | Signaling proteins                              |                   |                        |
| 40S ribosomal protein S15a          | RPS15A    | P62246    | 1 (1)                | Biosynthetic proteins                           |                   |                        |
| 60S acidic ribosomal protein P2     | RPLP2     | P02401    | 2 (3)                | Biosynthetic proteins                           |                   |                        |
| 60S ribosomal protein L13           | RPL13     | P41123    | 1 (1)                | Biosynthetic proteins                           |                   |                        |
| 60S ribosomal protein L14           | RPL14     | Q63507    | 2 (6)                | Biosynthetic proteins                           |                   |                        |
| 60S ribosomal protein L15           | RPL15     | P61314    | 1 (1)                | Biosynthetic proteins                           |                   |                        |
| 60S ribosomal protein L23           | RPL23     | P62832    | 1 (1)                | Biosynthetic proteins                           |                   |                        |
| 60S ribosomal protein L34           | RPL34     | P11250    | 1 (1)                | Biosynthetic proteins                           |                   |                        |
| 60S ribosomal protein L8            | RPL8      | P62919    | 1 (7)                | Biosynthetic proteins                           |                   |                        |
| 6-phosphofructokinase, liver        | PFKL      | P30835    | 1 (2)                | Metabolism Proteins                             |                   |                        |
| 6-phosphofructokinase, muscle       | PFKM      | P47858    | 1 (2)                | Metabolism Proteins                             |                   |                        |
| Acetyl-CoA carboxylase 1            | ACACA     | P11497    | 1 (1)                | Biosynthetic proteins                           |                   |                        |
| ADAM 10 precursor                   | ADAM10    | Q10743    | 1 (1)                | Signaling proteins                              | I                 |                        |
| ADAM 17 precursor                   | ADAM17    | Q9Z1K9    | 1 (1)                | Signaling proteins                              | I                 |                        |
| ADP-ribosylation factor 2           | ARF2      | P84082    | 3 (4)                | Small GTP binding proteins and related proteins |                   |                        |
| ADP-ribosylation factor 4           | ARF4      | P61751    | 1 (1)                | Small GTP binding proteins and related proteins |                   |                        |
| ADP-ribosylation factor 5           | ARF5      | P84083    | 3 (13)               | Small GTP binding proteins and related proteins |                   |                        |
| Agrin precursor                     | AGRN      | P25304    | 4 (20)               | Adhesion proteins and collagens                 | II                |                        |
| Amine oxidase [flavin-containing] A | MAOA      | P21396    | 1 (1)                | Protein degradation pathways                    | II                |                        |

|                                                                                         |         |        |        |                                                   |     |        |
|-----------------------------------------------------------------------------------------|---------|--------|--------|---------------------------------------------------|-----|--------|
| ATP synthase delta chain, mitochondrial precursor                                       | ATP5D   | P35434 | 1 (2)  | Metabolism<br>Proteins                            |     |        |
| ATP synthase O subunit, mitochondrial precursor                                         | ATP5O   | Q06647 | 1 (2)  | Metabolism<br>Proteins                            |     |        |
| ATP-sensitive inward rectifier potassium channel 1                                      | KCNJ1   | P35560 | 1 (1)  | Transporters and<br>Channels                      | III | RT-PCR |
| Beta-2-microglobulin precursor                                                          | B2M     | P07151 | 1 (1)  | Miscellaneous<br>proteins                         |     |        |
| Beta-glucuronidase precursor                                                            | GUSB    | P06760 | 4 (8)  | Protein<br>degradation<br>pathways                |     |        |
| Carbonic anhydrase 2                                                                    | CA2     | P27139 | 2 (7)  | Transporters and<br>channels (related<br>protein) |     |        |
| Core histone macro-H2A.1                                                                | H2AFY   | Q02874 | 3 (4)  | Nuclear proteins                                  |     |        |
| Corticosteroid 11-beta-dehydrogenase isozyme 1                                          | HSD11B1 | P16232 | 1 (2)  | Steroid<br>metabolizing<br>enzymes                |     |        |
| Cytochrome c oxidase polypeptide Va, mitochondrial precursor                            | COX5A   | P11240 | 1 (2)  | Metabolism<br>Proteins                            |     |        |
| Cytochrome c oxidase subunit 4 isoform 1, mitochondrial precursor                       | COX4I1  | P10888 | 3 (4)  | Metabolism<br>Proteins                            | II  |        |
| Dihydropyrimidinase-related protein 2                                                   | DPYSL2  | P47942 | 1 (1)  | Miscellaneous<br>proteins                         |     |        |
| Dolichyl-diphosphooligosaccharide--protein glycosyltransferase 63 kDa subunit precursor | RPN2    | P25235 | 5 (8)  | Biosynthetic<br>proteins                          | III |        |
| Dolichyl-diphosphooligosaccharide--protein glycosyltransferase 67 kDa subunit precursor | RPN1    | P07153 | 5 (8)  | Biosynthetic<br>proteins                          | III |        |
| Ectonucleotide pyrophosphatase/phosphodiesterase 1                                      | ENPP1   | Q924C3 | 1 (1)  | Signaling proteins                                | II  |        |
| Endoplasmic reticulum protein ERp29 precursor                                           | ERP29   | P52555 | 2 (5)  | Biosynthetic<br>proteins                          |     |        |
| Epithelial-cadherin precursor                                                           | CDH1    | Q9R0T4 | 8 (16) | Adhesion proteins<br>and collagens                | I   |        |
| Frizzled 1 precursor                                                                    | FZD1    | Q08463 | 1 (1)  | Membrane<br>receptors                             | III | RT-PCR |
| Galectin-3                                                                              | LGALS3  | P08699 | 3 (7)  | Miscellaneous<br>proteins                         |     |        |
| Glutathione S-transferase theta-2                                                       | GSTT2   | P30713 | 1 (2)  | Stress proteins                                   |     |        |
| Golgi apparatus protein 1 precursor                                                     | GLG1    | Q62638 | 2 (4)  | Adhesion proteins<br>and collagens                | I   |        |



|                                                          |        |        |         |                                                             |     |
|----------------------------------------------------------|--------|--------|---------|-------------------------------------------------------------|-----|
| GTP:AMP phosphotransferase mitochondrial                 | AK3    | P29411 | 1 (1)   | Metabolism<br>Proteins                                      |     |
| GTP-binding protein ARD-1                                | TRIM23 | P36407 | 1 (1)   | Small GTP<br>binding proteins<br>and related<br>proteins    |     |
| Heat-shock protein beta-3                                | HSPB3  | Q9QZ58 | 1 (1)   | Chaperone                                                   |     |
| Hemoglobin beta-1 subunit                                | HBB    | P02091 | 2 (4)   | Miscellaneous<br>proteins                                   |     |
| Heparin-binding growth factor 2 precursor                | FGF2   | P13109 | 1 (2)   | Miscellaneous<br>proteins                                   |     |
| Histone H2A 1                                            |        | P02262 | 6 (18)  | Nuclear proteins                                            |     |
| Histone H2B                                              |        | Q00715 | 2 (4)   | Nuclear proteins                                            |     |
| Histone H3                                               | H3F3B  | P84245 | 3 (4)   | Nuclear proteins                                            |     |
| Hyaluronan and proteoglycan link protein 2 precursor     | HAPLN2 | Q9ESM2 | 1 (5)   | Secreted proteins                                           |     |
| Insulin-like growth factor 1 receptor precursor          | IGF1R  | P24062 | 3 (4)   | Membrane<br>receptors                                       | I   |
| Integrin beta-1 precursor                                | ITGB1  | P49134 | 24 (54) | Adhesion proteins<br>and collagens                          | I   |
| Lactadherin precursor                                    | MFGE8  | P70490 | 3 (6)   | Miscellaneous<br>proteins                                   |     |
| Major vault protein                                      | MVP    | Q62667 | 4 (4)   | Miscellaneous<br>proteins                                   |     |
| Myosin regulatory light chain 2-B, smooth muscle isoform | RLC-B  | P18666 | 2 (2)   | Cytoskeletal<br>Proteins and<br>Linkers/Molecular<br>Motors |     |
| Neural cell adhesion molecule L1 precursor               | L1CAM  | Q05695 | 2 (2)   | Adhesion proteins<br>and collagens                          | I   |
| Neuropilin-1 precursor                                   | NRP1   | Q9QWJ9 | 2 (2)   | Membrane<br>receptors                                       | I   |
| Nucleobindin-1 precursor                                 | NUCB1  | Q63083 | 1 (1)   | Miscellaneous<br>proteins                                   |     |
| Peptidyl-prolyl cis-trans isomerase B precursor          | PPIB   | P24368 | 2 (3)   | Biosynthetic<br>proteins                                    |     |
| Peroxiredoxin-1                                          | PRDX1  | Q63716 | 3 (3)   | Stress proteins                                             |     |
| Peroxiredoxin-5, mitochondrial precursor                 | PRDX5  | Q9R063 | 1 (2)   | Stress proteins                                             |     |
| Phosphatidylethanolamine-binding protein                 | PBP    | P31044 | 1 (1)   | Signaling proteins                                          |     |
| Poly [ADP-ribose] polymerase 1                           | PARP1  | P27008 | 1 (1)   | Stress proteins                                             |     |
| Probable G-protein coupled receptor 116 precursor        | GPR116 | Q9WVT0 | 2 (4)   | Membrane<br>receptors                                       | III |

|                                                                  |          |        |         |                                                 |   |
|------------------------------------------------------------------|----------|--------|---------|-------------------------------------------------|---|
| Programmed cell death 6-interacting protein                      | PDCD6IP  | Q9QZA2 | 1 (1)   | Apoptosis proteins                              |   |
| Prolyl 4-hydroxylase alpha-1 subunit precursor                   | P4HA1    | P54001 | 1 (2)   | Biosynthetic proteins                           |   |
| Prostaglandin F2 receptor negative regulator precursor           | PTGFRN   | Q62786 | 1 (2)   | Miscellaneous proteins                          | I |
| Proto-oncogene C-crk                                             | CRK      | Q63768 | 1 (2)   | Signaling proteins                              |   |
| Pyruvate carboxylase, mitochondrial precursor                    | PC       | P52873 | 13 (17) | Metabolism Proteins                             |   |
| Ras-related protein Rab-1B                                       | RAB1B    | P10536 | 1 (1)   | Small GTP binding proteins and related proteins |   |
| Replication protein A 32 kDa subunit                             | RPA2     | Q63528 | 1 (1)   | Nuclear proteins                                |   |
| Serine/threonine-protein phosphatase PP1-gamma catalytic subunit | PPP1CC   | P63088 | 1 (1)   | Protein phosphatases                            |   |
| Single-stranded DNA-binding protein, mitochondrial precursor     | SSBP1    | P28042 | 1 (2)   | Stress proteins                                 |   |
| SPARC precursor                                                  | SPARC    | P16975 | 1 (1)   | Secreted proteins                               |   |
| Succinate dehydrogenase [ubiquinone] iron-sulfur protein         | SDHB     | P21913 | 1 (1)   | Metabolism Proteins                             |   |
| Superoxide dismutase [Cu-Zn]                                     | SOD1     | P07632 | 1 (2)   | Stress proteins                                 |   |
| Superoxide dismutase [Mn], mitochondrial precursor               | SOD2     | P07895 | 1 (2)   | Stress proteins                                 |   |
| T-complex protein 1 subunit delta                                | CCT4     | Q7TPB1 | 2 (3)   | Chaperone                                       |   |
| Thioredoxin                                                      | TXN      | P11232 | 1 (2)   | Stress proteins                                 |   |
| Trimethyllysine dioxygenase, mitochondrial precursor             | TMLHE    | Q91ZW6 | 1 (1)   | Biosynthetic proteins                           |   |
| 14-3-3 protein zeta/delta                                        | YWHAZ    | P63102 | 1 (1)   | Signaling proteins                              |   |
| 150 kDa oxygen-regulated protein precursor                       | HYOU1    | Q63617 | 5 (5)   | Chaperones                                      |   |
| 3,2-trans-enoyl-CoA isomerase, mitochondrial precursor           | DCI      | P23965 | 3 (4)   | Biosynthetic proteins                           |   |
| 3-hydroxyacyl-CoA dehydrogenase type-2                           | HADH2    | O70351 | 9 (11)  | Metabolism proteins                             |   |
| 3-hydroxyisobutyrate dehydrogenase, mitochondrial precursor      | HIBADH   | P29266 | 1 (1)   | Miscellaneous proteins                          |   |
| 3-ketoacyl-CoA thiolase, mitochondrial                           | ACAA2    | P13437 | 5 (5)   | Metabolism proteins                             |   |
| 47 kDa heat shock protein precursor                              | SERPINH1 | P29457 | 2 (2)   | Chaperones                                      |   |

|                                                                                |         |        |          |                                                    |     |
|--------------------------------------------------------------------------------|---------|--------|----------|----------------------------------------------------|-----|
| 60 kDa heat shock protein, mitochondrial precursor                             | HSPD1   | P63039 | 17 (19)  | Chaperones                                         |     |
| 60S acidic ribosomal protein P0                                                | RPLP0   | P19945 | 6 (7)    | Biosynthetic proteins                              |     |
| 60S ribosomal protein L11                                                      | RPL11   | P62914 | 1 (1)    | Biosynthetic proteins                              |     |
| 60S ribosomal protein L18                                                      | RPL18   | P12001 | 1 (1)    | Biosynthetic proteins                              |     |
| 60S ribosomal protein L6                                                       | RPL6    | P21533 | 1 (1)    | Biosynthetic proteins                              |     |
| 60S ribosomal protein L7                                                       | RPL7    | P05426 | 1 (1)    | Biosynthetic proteins                              |     |
| 78 kDa glucose-regulated protein precursor                                     | HSPA5   | P06761 | 14 (18)  | Biosynthetic proteins                              |     |
| Acetyl-CoA acetyltransferase, mitochondrial precursor                          | ACAT1   | P17764 | 9 (23)   | Metabolism proteins                                |     |
| Actin, alpha cardiac                                                           | ACTC    | P68035 | 19 (265) | Cytoskeletal proteins and linkers/molecular motors |     |
| Actin, cytoplasmic 2                                                           | ACTG1   | P63259 | 13 (114) | Cytoskeletal proteins and linkers/molecular motors |     |
| Acyl-CoA dehydrogenase, long-chain specific, mitochondrial precursor           | ACADL   | P15650 | 3 (6)    | Metabolism proteins                                |     |
| Acyl-CoA dehydrogenase, short/branched chain specific, mitochondrial precursor | ACADSB  | P70584 | 1 (1)    | Metabolism proteins                                |     |
| Acyl-CoA dehydrogenase, very-long-chain specific, mitochondrial precursor      | ACADVL  | P45953 | 4 (10)   | Metabolism proteins                                |     |
| ADP/ATP translocase 1                                                          | SLC25A4 | Q05962 | 2 (2)    | Transporters and channels                          | III |
| ADP/ATP translocase 2                                                          | SLC25A5 | Q09073 | 4 (16)   | Transporters and channels                          | III |
| Aldose reductase                                                               | AKR1B1  | P07943 | 8 (27)   | Stress proteins                                    |     |
| Alpha crystallin B chain                                                       | CRYAB   | P23928 | 3 (5)    | Chaperones                                         |     |
| Alpha-actinin-1                                                                | ACTN1   | Q9Z1P2 | 7 (10)   | Cytoskeletal proteins and linkers/molecular motors |     |
| Alpha-actinin-4                                                                | ACTN4   | Q9QXQ0 | 26 (56)  | Cytoskeletal proteins and linkers/molecular motors |     |

|                                                     |        |        |         |                                 |   |        |
|-----------------------------------------------------|--------|--------|---------|---------------------------------|---|--------|
| Alpha-enolase                                       | ENO1   | P04764 | 8 (9)   | Metabolism proteins             |   |        |
| Annexin A1                                          | ANXA1  | P07150 | 8 (16)  | Membrane trafficking proteins   |   |        |
| Annexin A2                                          | ANXA2  | Q07936 | 21 (55) | Membrane trafficking proteins   |   |        |
| Annexin A5                                          | ANXA5  | P14668 | 4 (6)   | Membrane trafficking proteins   |   |        |
| Annexin A6                                          | ANXA6  | P48037 | 4 (4)   | Membrane trafficking proteins   |   |        |
| AP-2 complex subunit alpha-2                        | AP2A2  | P18484 | 1 (1)   | Membrane trafficking proteins   |   |        |
| AP-2 complex subunit beta-1                         | AP2B1  | P62944 | 2 (4)   | Membrane trafficking proteins   |   |        |
| Arginase-2, mitochondrial precursor                 | ARG2   | O08701 | 2 (2)   | Biosynthetic proteins           |   |        |
| Aspartate aminotransferase, mitochondrial precursor | GOT2   | P00507 | 8 (10)  | Biosynthetic proteins           |   |        |
| ATP synthase alpha chain, mitochondrial precursor   | ATP5A1 | P15999 | 18 (74) | Metabolism proteins             |   |        |
| ATP synthase beta chain, mitochondrial precursor    | ATP5B  | P10719 | 23 (42) | Metabolism proteins             |   |        |
| ATP synthase gamma chain, mitochondrial             | ATP5C1 | P35435 | 3 (3)   | Metabolism proteins             |   |        |
| Beta-catenin                                        | CTNNB1 | Q9WU82 | 6 (7)   | Signaling proteins              |   |        |
| Calnexin precursor                                  | CANX   | P35565 | 13 (27) | Chaperones                      | I |        |
| Calpain small subunit 1                             | CAPNS1 | Q64537 | 2 (2)   | Protein degradation pathways    |   |        |
| Calreticulin precursor                              | CALR   | P18418 | 3 (4)   | Chaperones                      |   |        |
| Calumenin precursor                                 | CALU   | O35783 | 1 (1)   | Miscellaneous proteins          |   |        |
| Catalase                                            | CAT    | P04762 | 1 (1)   | Stress proteins                 |   |        |
| CD166 antigen precursor                             | ALCAM  | O35112 | 1 (2)   | Adhesion proteins and collagens | I | RT-PCR |
| Ceruloplasmin precursor                             | CP     | P13635 | 2 (2)   | Secreted proteins               |   |        |
| Clathrin heavy chain                                | CLTC   | P11442 | 10 (13) | Membrane trafficking proteins   |   |        |

|                                                                                                                             |          |        |         |                                                 |     |
|-----------------------------------------------------------------------------------------------------------------------------|----------|--------|---------|-------------------------------------------------|-----|
| Cytochrome c oxidase subunit 2                                                                                              | MTCO2    | P00406 | 1 (1)   | Metabolism proteins                             | III |
| Dihydrolipoyllysine-residue acetyltransferase component of pyruvate dehydrogenase complex                                   | DLAT     | P08461 | 2 (4)   | Metabolism proteins                             |     |
| Dihydrolipoyllysine-residue succinyltransferase component of 2- oxoglutarate dehydrogenase complex, mitochondrial precursor | DLST     | Q01205 | 1 (1)   | Metabolism proteins                             |     |
| Elongation factor 1-alpha 1                                                                                                 | EEF1A1   | P62630 | 4 (5)   | Biosynthetic proteins                           |     |
| Elongation factor 1-alpha 2                                                                                                 | EEF1A2   | P62632 | 4 (11)  | Biosynthetic proteins                           |     |
| Elongation factor 2                                                                                                         | EEF2     | P05197 | 3 (3)   | Biosynthetic proteins                           |     |
| Enoyl-CoA hydratase, mitochondrial precursor                                                                                | ECHS1    | P14604 | 3 (3)   | Biosynthetic proteins                           |     |
| Gamma-enolase                                                                                                               | ENO2     | P07323 | 2 (2)   | Metabolism proteins                             |     |
| Glutamate dehydrogenase 1, mitochondrial precursor                                                                          | GLUD1    | P10860 | 5 (5)   | Metabolism proteins                             |     |
| Glutaminase kidney isoform, mitochondrial precursor                                                                         | GLS      | P13264 | 2 (3)   | Metabolism proteins                             |     |
| Glutathione peroxidase 1                                                                                                    | GPX1     | P04041 | 1 (1)   | Stress proteins                                 |     |
| Glyceraldehyde-3-phosphate dehydrogenase                                                                                    | GAPDH    | P04797 | 7 (17)  | Metabolism proteins                             |     |
| Glycerol-3-phosphate dehydrogenase, mitochondrial precursor                                                                 | GPD2     | P35571 | 2 (4)   | Metabolism proteins                             |     |
| GTP-binding nuclear protein Ran                                                                                             | RAN      | P62828 | 1 (1)   | Small GTP binding proteins and related proteins |     |
| Guanine nucleotide-binding protein beta subunit 2-like 1                                                                    | GNB2L1   | P63245 | 1 (1)   | Heterotrimeric G proteins                       |     |
| Guanine nucleotide-binding protein G                                                                                        | GNAI2    | P04897 | 7 (8)   | Heterotrimeric G proteins                       |     |
| Heat shock 70 kDa protein 1A/1B                                                                                             | HSPA1A   | Q07439 | 12 (26) | Chaperones                                      |     |
| Heat shock cognate 71 kDa protein                                                                                           | HSPA8    | P63018 | 6 (10)  | Chaperones                                      |     |
| Heat shock protein HSP 90-beta                                                                                              | HSP90AB1 | P34058 | 10 (11) | Chaperones                                      |     |
| Heat shock-related 70 kDa protein 2                                                                                         | HSPA2    | P14659 | 4 (4)   | Chaperones                                      |     |
| Heat-shock protein beta-1                                                                                                   | HSPB1    | P42930 | 6 (10)  | Chaperones                                      |     |
| Hexokinase-1                                                                                                                | HK1      | P05708 | 2 (3)   | Metabolism proteins                             |     |

|                                                                                |          |        |          |                                                    |   |
|--------------------------------------------------------------------------------|----------|--------|----------|----------------------------------------------------|---|
| Histone H1.0                                                                   | H1F0     | P43278 | 1 (1)    | Nuclear proteins                                   |   |
| Histone H1.2                                                                   | HIST1H1C | P15865 | 1 (1)    | Nuclear proteins                                   |   |
| Histone H4 [Contains: Osteogenic growth peptide                                | HIST1H4B | P62804 | 1 (1)    | Nuclear proteins                                   |   |
| Integrin alpha-1 precursor                                                     | ITGA1    | P18614 | 2 (2)    | Adhesion proteins and collagens                    | I |
| Interferon-induced GTP-binding protein Mx2                                     | MX2      | P18589 | 1 (1)    | Membrane trafficking proteins                      |   |
| Isovaleryl-CoA dehydrogenase, mitochondrial precursor                          | IVD      | P12007 | 2 (4)    | Metabolism proteins                                |   |
| Keratin, I cytoskeletal 19                                                     | KRT19    | Q63279 | 5 (12)   | Cytoskeletal proteins and linkers/molecular motors |   |
| Keratin, II cytoskeletal 8                                                     | KRT8     | Q10758 | 9 (29)   | Cytoskeletal proteins and linkers/molecular motors |   |
| Lamin-A                                                                        | LMNA     | P48679 | 5 (7)    | Cytoskeletal proteins and linkers/molecular motors |   |
| Laminin beta-2 chain precursor                                                 | LAMB2    | P15800 | 2 (2)    | Adhesion proteins and collagens                    |   |
| L-lactate dehydrogenase A chain                                                | LDHA     | P04642 | 3 (3)    | Metabolism proteins                                |   |
| Malate dehydrogenase, mitochondrial precursor                                  | MDH2     | P04636 | 9 (32)   | Metabolism proteins                                |   |
| Methylmalonate-semialdehyde dehydrogenase [acylating], mitochondrial precursor | ALDH6A1  | Q02253 | 5 (7)    | Metabolism proteins                                |   |
| Moesin                                                                         | MSN      | O35763 | 3 (3)    | Cytoskeletal proteins and linkers/molecular motors |   |
| Myosin Id                                                                      | MYO1D    | Q63357 | 6 (9)    | Cytoskeletal proteins and linkers/molecular motors |   |
| Myosin light polypeptide 6                                                     | MYL6     | Q64119 | 1 (3)    | Cytoskeletal proteins and linkers/molecular motors |   |
| Myosin-10                                                                      | MYH10    | Q9JLT0 | 71 (141) | Cytoskeletal proteins and linkers/molecular motors |   |

|                                                                        |         |        |          |                                                    |     |        |
|------------------------------------------------------------------------|---------|--------|----------|----------------------------------------------------|-----|--------|
| Myosin-11                                                              | MYH11   | Q63862 | 7 (33)   | Cytoskeletal proteins and linkers/molecular motors |     |        |
| Myosin-9                                                               | MYH9    | Q62812 | 67 (137) | Cytoskeletal proteins and linkers/molecular motors |     |        |
| NADH-ubiquinone oxidoreductase 24 kDa subunit, mitochondrial precursor | NDUFV2  | P19234 | 1 (1)    | Metabolism proteins                                |     |        |
| Neurofilament triplet H protein                                        | NEFH    | P16884 | 1 (1)    | Cytoskeletal proteins and linkers/molecular motors |     |        |
| Peroxisomal multifunctional enzyme 2                                   | HSD17B4 | P97852 | 5 (6)    | Metabolism proteins                                |     |        |
| Phosphate carrier protein, mitochondrial precursor                     | SLC25A3 | P16036 | 2 (5)    | Transporters and channels                          | III |        |
| Plastin-3                                                              | PLS3    | Q63598 | 3 (4)    | Cytoskeletal proteins and linkers/molecular motors |     |        |
| Plectin 1                                                              | PLEC1   | P30427 | 9 (11)   | Cytoskeletal proteins and linkers/molecular motors |     |        |
| Podocalyxin precursor                                                  | PODXL   | Q9WTQ2 | 1 (1)    | Adhesion proteins and collagens                    | I   | RT-PCR |
| Profilin-1                                                             | PFN1    | P62963 | 1 (2)    | Cytoskeletal proteins and linkers/molecular motors |     |        |
| Programmed cell death protein 8, mitochondrial precursor               | PDCD8   | Q9JM53 | 6 (8)    | Apoptosis proteins                                 |     |        |
| Prohibitin                                                             | PHB     | P67779 | 5 (6)    | Miscellaneous proteins                             |     |        |
| Propionyl-CoA carboxylase beta chain, mitochondrial precursor          | PCCB    | P07633 | 4 (5)    | Metabolism proteins                                |     |        |
| Prostaglandin G/H synthase 1 precursor                                 | PTGS1   | Q63921 | 3 (5)    | Signaling proteins                                 |     |        |
| Protein disulfide-isomerase A3 precursor                               | PDIA3   | P11598 | 14 (24)  | Biosynthetic proteins                              |     |        |
| Protein disulfide-isomerase A4 precursor                               | PDIA4   | P38659 | 3 (3)    | Biosynthetic proteins                              |     |        |
| Protein disulfide-isomerase A6 precursor                               | PDIA6   | Q63081 | 4 (4)    | Biosynthetic proteins                              |     |        |

|                                                                                          |        |        |          |                                                    |     |
|------------------------------------------------------------------------------------------|--------|--------|----------|----------------------------------------------------|-----|
| Protein disulfide-isomerase precursor                                                    | P4HB   | P04785 | 6 (6)    | Biosynthetic proteins                              |     |
| Pyruvate dehydrogenase E1 component alpha subunit, somatic form, mitochondrial precursor | PDHA1  | P26284 | 2 (5)    | Metabolism proteins                                |     |
| Pyruvate dehydrogenase E1 component beta subunit, mitochondrial precursor                | PDHB   | P49432 | 4 (6)    | Metabolism proteins                                |     |
| Pyruvate kinase isozymes M1/M2                                                           | PKM2   | P11980 | 14 (28)  | Metabolism proteins                                |     |
| Ras-related protein Rab-14                                                               | RAB14  | P61107 | 2 (3)    | Small GTP binding proteins and related proteins    |     |
| Ras-related protein Rab-1A                                                               | RAB1A  | Q6NYB7 | 1 (1)    | Small GTP binding proteins and related proteins    |     |
| Serum albumin precursor                                                                  | ALB    | P02770 | 6 (7)    | Secreted proteins                                  |     |
| Short chain 3-hydroxyacyl-CoA dehydrogenase, mitochondrial precursor                     | HADHSC | Q9WVK7 | 2 (2)    | Metabolism proteins                                |     |
| Sodium/potassium-transporting ATPase alpha-1 chain precursor                             | ATP1A1 | P06685 | 26 (134) | Ion pumps                                          | III |
| Sodium/potassium-transporting ATPase alpha-3 chain                                       | ATP1A3 | P06687 | 15 (63)  | Ion pumps                                          | III |
| Sodium/potassium-transporting ATPase beta-1 chain                                        | ATP1B1 | P07340 | 6 (14)   | Ion pumps                                          | II  |
| Sodium/potassium-transporting ATPase beta-3 chain                                        | ATP1B3 | Q63377 | 1 (3)    | Ion pumps                                          | II  |
| Spectrin alpha chain, brain                                                              | SPTAN1 | P16086 | 70 (151) | Cytoskeletal proteins and linkers/molecular motors |     |
| Spectrin beta chain, brain 2                                                             | SPTBN2 | Q9QWN8 | 51 (94)  | Cytoskeletal proteins and linkers/molecular motors |     |
| Stress-70 protein, mitochondrial precursor                                               | HSPA9  | P48721 | 14 (16)  | Chaperones                                         |     |
| Succinate dehydrogenase [ubiquinone] flavoprotein subunit, mitochondrial precursor       | SDHA   | Q920L2 | 3 (4)    | Metabolism proteins                                |     |
| Transitional endoplasmic reticulum ATPase                                                | VCP    | P46462 | 3 (3)    | Membrane trafficking proteins                      |     |
| Transketolase                                                                            | TKT    | P50137 | 1 (1)    | Metabolism proteins                                |     |



|                                                                                  |          |        |         |                                                    |     |
|----------------------------------------------------------------------------------|----------|--------|---------|----------------------------------------------------|-----|
| Trifunctional enzyme alpha subunit, mitochondrial precursor                      | HADHA    | Q64428 | 13 (16) | Metabolism proteins                                |     |
| Trifunctional enzyme beta subunit, mitochondrial precursor                       | HADHB    | Q60587 | 2 (2)   | Metabolism proteins                                |     |
| Triosephosphate isomerase                                                        | TPI1     | P48500 | 5 (6)   | Biosynthetic proteins                              |     |
| Tubulin alpha-1 chain                                                            | TUBA1    | P68370 | 11 (29) | Cytoskeletal proteins and linkers/molecular motors |     |
| Tubulin alpha-2 chain                                                            | TUBA2    | Q6P9V9 | 3 (7)   | Cytoskeletal proteins and linkers/molecular motors |     |
| Tubulin beta chain                                                               |          | P04691 | 3 (10)  | Cytoskeletal proteins and linkers/molecular motors |     |
| Ubiquinol-cytochrome-c reductase complex core protein 2, mitochondrial precursor | UQCRC2   | P32551 | 10 (26) | Metabolism proteins                                |     |
| Ubiquitin                                                                        | RPS27A   | P62989 | 1 (9)   | Protein degradation pathways                       |     |
| Vacuolar ATP synthase subunit B, brain isoform                                   | ATP6V1B2 | P62815 | 2 (2)   | Metabolism proteins                                |     |
| Vimentin                                                                         | VIM      | P31000 | 2 (2)   | Cytoskeletal proteins and linkers/molecular motors |     |
| Voltage-dependent anion-selective channel protein 2                              | VDAC2    | P81155 | 4 (8)   | Transporters and channels                          | III |

a, Number of peptides identified with their total hit number in the parenthesis; b, Collecting duct database (CDDb) family group names; c, Membrane protein types: I, one membrane spanning helix with an extracellular N<sup>o</sup>-terminus; II, one membrane spanning helix with an extracellular C<sup>o</sup>-terminus; III, multiple membrane spanning helices; GPI, glycosylphosphatidylinositol-linked; d, Protein identifications confirmed by RT-PCR.

Table S-5. Number of proteins identified from the non-fixed perfusion- and incubation-biotinylated inner medullary collecting ducts (IMCDs).

| Non-fixed perfusion-biotinylated IMCDs |                                       |                                       |                             |                                               |
|----------------------------------------|---------------------------------------|---------------------------------------|-----------------------------|-----------------------------------------------|
| Peptide number <sup>a</sup>            | Original database search <sup>b</sup> | Reversed database search <sup>c</sup> | Net difference <sup>d</sup> | Manually accepted identification <sup>e</sup> |
| 1                                      | 497                                   | 452                                   | 45                          | 32                                            |
| 2                                      | 78                                    | 67                                    | 11                          | 20                                            |
| 3                                      | 25                                    | 12                                    | 13                          | 17                                            |
| 4                                      | 12                                    | 2                                     | 10                          | 10                                            |
| >4                                     | 41                                    | 0                                     | 41                          | 38                                            |
| Total                                  | 653                                   | 533                                   | 120                         | 117                                           |

  

| Non-fixed incubation-biotinylated IMCDs |                                       |                                       |                             |                                               |
|-----------------------------------------|---------------------------------------|---------------------------------------|-----------------------------|-----------------------------------------------|
| Peptide number <sup>a</sup>             | Original database search <sup>b</sup> | Reversed database search <sup>c</sup> | Net difference <sup>d</sup> | Manually accepted identification <sup>e</sup> |
| 1                                       | 140                                   | 19                                    | 121                         | 91                                            |
| 2                                       | 44                                    | 1                                     | 43                          | 41                                            |
| 3                                       | 29                                    | 0                                     | 29                          | 27                                            |
| 4                                       | 18                                    | 0                                     | 18                          | 15                                            |
| >4                                      | 65                                    | 0                                     | 65                          | 61                                            |
| Total                                   | 296                                   | 20                                    | 276                         | 235                                           |

a, Number of peptides identified for particular proteins; b, Number of proteins passing the default criteria of the Bioworks/Sequest search algorithm using the Swiss-Prot database; c, Same as b except the sequences in the database were reversed; d, Estimated number of proteins likely to be valid identifications; e, Number of proteins passing manual spectrum inspection.

Table S-6. Proteins identified from the non-fixed perfusion- and incubation-biotinylated inner medullary collecting ducts (IMCDs).

| Protein name                                                | Gene name | Accession | Ion (n) <sup>a</sup> | CDDB family <sup>b</sup>     | Type <sup>c</sup> | P/I  |
|-------------------------------------------------------------|-----------|-----------|----------------------|------------------------------|-------------------|------|
| 14-3-3 protein beta/alpha                                   | YWHAB     | P35213    | 2 (4)                | Signaling proteins           |                   | P    |
| 14-3-3 protein epsilon                                      | YWHAE     | P62260    | 6 (9)                | Signaling proteins           |                   | P    |
| 14-3-3 protein eta                                          | YWHAH     | P68511    | 3 (11)               | Signaling proteins           |                   | P    |
| 14-3-3 protein theta                                        | YWHAQ     | P68255    | 6 (13),<br>1(1)      | Signaling proteins           |                   | P, I |
| 14-3-3 protein zeta/delta                                   | YWHAZ     | P63102    | 6 (15),<br>1 (1)     | Signaling proteins           |                   | P, I |
| 150 kDa oxygen-regulated protein precursor                  | HYOU1     | Q63617    | 5 (5)                | Chaperones                   |                   | I    |
| 26S protease regulatory subunit 8                           | PSMC5     | P62198    | 1 (1)                | Protein degradation pathways |                   | I    |
| 3,2-trans-enoyl-CoA isomerase, mitochondrial precursor      | DCI       | P23965    | 3 (4)                | Biosynthetic proteins        |                   | I    |
| 3-hydroxyacyl-CoA dehydrogenase type-2                      | HADH2     | O70351    | 9 (11)               | Metabolism proteins          |                   | I    |
| 3-hydroxyisobutyrate dehydrogenase, mitochondrial precursor | HIBADH    | P29266    | 1 (1)                | Miscellaneous proteins       |                   | I    |
| 3-ketoacyl-CoA thiolase, mitochondrial                      | ACAA2     | P13437    | 5 (5)                | Metabolism proteins          |                   | I    |
| 3-mercaptopyruvate sulfurtransferase                        | MPST      | P97532    | 2 (2)                | Metabolism proteins          |                   | I    |
| 40S ribosomal protein S14                                   | RPS14     | P13471    | 1 (1)                | Biosynthetic proteins        |                   | I    |
| 40S ribosomal protein S2                                    | RPS2      | P27952    | 1 (1)                | Biosynthetic proteins        |                   | I    |
| 40S ribosomal protein S3                                    | RPS3      | P62909    | 1 (1)                | Biosynthetic proteins        |                   | I    |
| 40S ribosomal protein S3a                                   | RPS3A     | P49242    | 2 (2)                | Biosynthetic proteins        |                   | I    |
| 40S ribosomal protein S8                                    | RPS8      | P62243    | 1 (1)                | Biosynthetic proteins        |                   | I    |
| 40S ribosomal protein SA                                    | RPSA      | P38983    | 4 (5),<br>2 (3)      | Biosynthetic proteins        |                   | P, I |
| 47 kDa heat shock protein precursor                         | SERPINH1  | P29457    | 2 (2)                | Chaperones                   |                   | I    |
| 60 kDa heat shock protein, mitochondrial precursor          | HSPD1     | P63039    | 17 (19)              | Chaperones                   |                   | I    |
| 60S acidic ribosomal protein P0                             | RPLP0     | P19945    | 6 (7)                | Biosynthetic proteins        |                   | I    |

|                                                                        |        |        |                     |                                                    |      |
|------------------------------------------------------------------------|--------|--------|---------------------|----------------------------------------------------|------|
| 60S ribosomal protein L11                                              | RPL11  | P62914 | 1 (1)               | Biosynthetic proteins                              | I    |
| 60S ribosomal protein L18                                              | RPL18  | P12001 | 1 (1)               | Biosynthetic proteins                              | I    |
| 60S ribosomal protein L3                                               | RPL3   | P21531 | 1 (1)               | Biosynthetic proteins                              | I    |
| 60S ribosomal protein L31                                              | RPL31  | P62902 | 1 (1)               | Biosynthetic proteins                              | I    |
| 60S ribosomal protein L4                                               | RPL4   | P50878 | 1 (1)               | Biosynthetic proteins                              | I    |
| 60S ribosomal protein L6                                               | RPL6   | P21533 | 1 (1)               | Biosynthetic proteins                              | I    |
| 60S ribosomal protein L7                                               | RPL7   | P05426 | 1 (1)               | Biosynthetic proteins                              | I    |
| 60S ribosomal protein L7a                                              | RPL7A  | P62425 | 1 (1)               | Biosynthetic proteins                              | I    |
| 78 kDa glucose-regulated protein precursor                             | HSPA5  | P06761 | 14 (28),<br>14 (18) | Chaperones                                         | P, I |
| Acetyl-CoA acetyltransferase, mitochondrial precursor                  | ACAT1  | P17764 | 9 (23)              | Metabolism proteins                                | I    |
| Actin, alpha cardiac                                                   | ACTC   | P68035 | 19<br>(265)         | Cytoskeletal proteins and linkers/molecular motors | I    |
| Actin, alpha skeletal muscle                                           | ACTA1  | P68136 | 20 (42)             | Cytoskeletal proteins and linkers/molecular motors | P    |
| Actin, cytoplasmic 1                                                   | ACTB   | P60711 | 12 (34)             | Cytoskeletal proteins and linkers/molecular motors | P    |
| Actin, cytoplasmic 2                                                   | ACTG1  | P63259 | 13<br>(114)         | Cytoskeletal proteins and linkers/molecular motors | I    |
| Actin-related protein 2/3 complex subunit 1B                           | ARPC1B | O88656 | 2 (2)               | Cytoskeletal proteins and linkers/molecular motors | I    |
| Acyl-CoA dehydrogenase, long-chain specific, mitochondrial precursor   | ACADL  | P15650 | 3 (6)               | Metabolism proteins                                | I    |
| Acyl-CoA dehydrogenase, medium-chain specific, mitochondrial precursor | ACADM  | P08503 | 2 (3)               | Metabolism proteins                                | I    |

|                                                                                     |          |        |                    |                                                    |     |      |
|-------------------------------------------------------------------------------------|----------|--------|--------------------|----------------------------------------------------|-----|------|
| Acyl-CoA dehydrogenase, short/branched chain specific, mitochondrial precursor      | ACADSB   | P70584 | 1 (1)              | Metabolism proteins                                |     | I    |
| Acyl-CoA dehydrogenase, very-long-chain specific, mitochondrial precursor           | ACADVL   | P45953 | 4 (10)             | Metabolism proteins                                |     | I    |
| Adenosylhomocysteinase                                                              | AHCY     | P10760 | 1 (1)              | Biosynthetic proteins                              |     | I    |
| Adipocyte-derived leucine aminopeptidase precursor                                  | ARTS1    | Q9JJ22 | 1 (1)              | Aminopeptidases                                    |     | I    |
| ADP/ATP translocase 1                                                               | SLC25A4  | Q05962 | 2 (2)              | Transporters and channels                          | III | I    |
| ADP/ATP translocase 2                                                               | SLC25A5  | Q09073 | 4 (16)             | Transporters and channels                          | III | I    |
| Afadin- and alpha-actinin-binding protein                                           | SSX2IP   | Q8CGZ2 | 1 (3)              | Tight junction proteins                            |     | I    |
| Aldehyde dehydrogenase 1A3                                                          | ALDH1A3  | Q8K4D8 | 1 (1)              | Metabolism proteins                                |     | I    |
| Aldose reductase                                                                    | AKR1B1   | P07943 | 16 (62),<br>8(27)  | Stress proteins                                    |     | P, I |
| Alkaline phosphatase, tissue-nonspecific isozyme precursor                          | ALPL     | P08289 | 1 (1)              | Protein phosphatases                               | GPI | P    |
| Alpha crystallin B chain                                                            | CRYAB    | P23928 | 1 (1),<br>3 (5)    | Chaperones                                         |     | P, I |
| Alpha-1-antiproteinase precursor                                                    | SERPINA1 | P17475 | 10 (12)            | Secreted proteins                                  |     | P    |
| Alpha-actinin-1                                                                     | ACTN1    | Q9Z1P2 | 9 (16),<br>7(10)   | Cytoskeletal proteins and linkers/molecular motors |     | P, I |
| Alpha-actinin-4                                                                     | ACTN4    | Q9QXQ0 | 5 (9),<br>26 (56)  | Cytoskeletal proteins and linkers/molecular motors |     | P, I |
| Alpha-enolase                                                                       | ENO1     | P04764 | 8 (9)              | Metabolism proteins                                |     | I    |
| AMBP protein precursor                                                              | AMBP     | Q64240 | 5 (15)             | Secreted proteins                                  |     | P    |
| Aminopeptidase B                                                                    | RNPEP    | O09175 | 1 (1)              | Secreted proteins                                  |     | I    |
| Amyotrophic lateral sclerosis 2 chromosomal region candidate gene 3 protein homolog | TRAK2    | Q8R2H7 | 1 (52)             | Membrane trafficking proteins                      |     | P    |
| Annexin A1                                                                          | ANXA1    | P07150 | 5 (16),<br>8 (16)  | Membrane trafficking proteins                      |     | P, I |
| Annexin A2                                                                          | ANXA2    | Q07936 | 7 (15),<br>21 (55) | Membrane trafficking proteins                      |     | P, I |
| Annexin A4                                                                          | ANXA4    | P55260 | 3 (3)              | Membrane trafficking proteins                      |     | I    |

|                                                        |         |        |                   |                                    |     |                |
|--------------------------------------------------------|---------|--------|-------------------|------------------------------------|-----|----------------|
| Annexin A5                                             | ANXA5   | P14668 | 1 (1),<br>4 (6)   | Membrane<br>trafficking proteins   |     | P, I           |
| Annexin A6                                             | ANXA6   | P48037 | 4 (4)             | Membrane<br>trafficking proteins   |     | I              |
| AP-2 complex subunit alpha-2                           | AP2A2   | P18484 | 1 (1)             | Membrane<br>trafficking proteins   |     | I              |
| AP-2 complex subunit beta-1                            | AP2B1   | P62944 | 2 (4)             | Membrane<br>trafficking proteins   |     | I              |
| Aquaporin-1                                            | AQP1    | P29975 | 4 (37),<br>4 (5)  | Transporters and<br>channels       | III | P, I           |
| Aquaporin-2                                            | AQP2    | P34080 | 2 (9),<br>3 (7)   | Transporters and<br>channels       | III | P, I           |
| Aquaporin-4                                            | AQP4    | P47863 | 3 (4),<br>1 (1)   | Transporters and<br>channels       | III | P, I           |
| Arginase-2, mitochondrial<br>precursor                 | ARG2    | O08701 | 2 (2)             | Biosynthetic<br>proteins           |     | I              |
| Aspartate aminotransferase,<br>mitochondrial precursor | GOT2    | P00507 | 8 (10)            | Biosynthetic<br>proteins           |     | I              |
| ATP synthase alpha chain,<br>mitochondrial precursor   | ATP5A1  | P15999 | 18 (74)           | Metabolism<br>proteins             |     | I              |
| ATP synthase B chain,<br>mitochondrial precursor       | ATP5F1  | P19511 | 6 (6)             | Metabolism<br>proteins             |     | I              |
| ATP synthase beta chain,<br>mitochondrial precursor    | ATP5B   | P10719 | 23 (42)           | Metabolism<br>proteins             |     | I              |
| ATP synthase gamma chain,<br>mitochondrial             | ATP5C1  | P35435 | 3 (3)             | Metabolism<br>proteins             |     | I              |
| ATP-citrate synthase                                   | ACLY    | P16638 | 4 (5)             | Biosynthetic<br>proteins           |     | I              |
| Band 3 anion transport protein                         | SLC4A1  | P23562 | 1 (1)             | Transporters and<br>channels       | III | I              |
| Barttin                                                | BSND    | Q8R2H3 | 7 (47)            | Transporters and<br>channels       | III | P              |
| Basigin precursor                                      | BSG     | P26453 | 2 (2)             | Transporters and<br>channels       | I   | I              |
| Beta-catenin                                           | CTNNB1  | Q9WU82 | 6 (7)             | Signaling proteins                 |     | I              |
| Calcium-binding protein p22                            | CHP     | P61023 | 1 (1),<br>1 (1)   | Membrane<br>trafficking proteins   |     | P, I           |
| Calcyclin                                              | S100A11 | Q6B345 | 1 (1)             | Biosynthetic<br>proteins           |     | I (RT-<br>PCR) |
| Calnexin precursor                                     | CANX    | P35565 | 2 (7),<br>13 (27) | Chaperones                         | I   | P, I           |
| Calpain small subunit 1                                | CAPNS1  | Q64537 | 2 (2)             | Protein<br>degradation<br>pathways |     | I              |

|                                                   |         |        |                  |                                                    |     |            |
|---------------------------------------------------|---------|--------|------------------|----------------------------------------------------|-----|------------|
| Calpain-1 catalytic subunit                       | CAPN1   | P97571 | 5 (6)            | Protein degradation pathways                       |     | I          |
| Calpain-2 catalytic subunit precursor             | CAPN2   | Q07009 | 1 (1)            | Protein degradation pathways                       |     | I          |
| Calponin-3                                        | CNN3    | P37397 | 1 (1)            | Cytoskeletal proteins and linkers/molecular motors |     | P          |
| Calreticulin precursor                            | CALR    | P18418 | 3 (4)            | Chaperones                                         |     | I          |
| Calumenin precursor                               | CALU    | O35783 | 1 (1)            | Miscellaneous proteins                             |     | I          |
| Carbonic anhydrase 4 precursor                    | CA4     | P48284 | 1 (4)            | Transporters and channels (related)                | GPI | P (RT-PCR) |
| Carnitine O-palmitoyltransferase I, liver isoform | CPT1A   | P32198 | 3 (4)            | Metabolism proteins                                | III | I          |
| Casein kinase II subunit alpha                    | CSNK2A1 | P19139 | 1 (1)            | Protein kinases, serine/threonine                  |     | I          |
| Catalase                                          | CAT     | P04762 | 1 (1)            | Stress proteins                                    |     | I          |
| Caveolin-1                                        | CAV1    | P41350 | 1 (4)            | Membrane trafficking proteins                      | III | I          |
| CD151 antigen                                     | CD151   | Q9QZA6 | 1 (1)            | Adhesion proteins and collagens                    | III | I          |
| CD166 antigen precursor                           | ALCAM   | O35112 | 1 (2)            | Adhesion proteins and collagens                    | I   | I (RT-PCR) |
| CD48 antigen precursor                            | CD48    | P10252 | 3 (4)            | Signaling proteins                                 | GPI | P          |
| CD59 glycoprotein precursor                       | CD59    | P27274 | 1 (5)            | Miscellaneous proteins                             | GPI | P (RT-PCR) |
| Ceruloplasmin precursor                           | CP      | P13635 | 40 (111), 2 (2)  | Secreted proteins                                  |     | P, I       |
| Chloride channel protein ClC-Ka                   | CLCNKA  | Q06393 | 2 (3)            | Transporters and channels                          | III | I          |
| Class I histocompatibility antigen, Non-RT1       | RT1-AW2 | P15978 | 1 (4)            | Miscellaneous proteins                             | I   | I          |
| Clathrin heavy chain                              | CLTC    | P11442 | 11 (11), 10 (13) | Membrane trafficking proteins                      |     | P, I       |
| Clathrin light chain A                            | CLTA    | P08081 | 3 (7)            | Membrane trafficking proteins                      |     | P          |
| Clathrin light chain B                            | CLTB    | P08082 | 1 (2)            | Membrane trafficking proteins                      |     | P          |
| Clusterin precursor                               | CLU     | P05371 | 13 (35)          | Secreted proteins                                  |     | P          |
| Coatomer subunit beta                             | COPB    | P23514 | 2 (2)            | Membrane trafficking proteins                      |     | I          |

|                                                                                                                            |          |        |                  |                                                    |     |      |
|----------------------------------------------------------------------------------------------------------------------------|----------|--------|------------------|----------------------------------------------------|-----|------|
| Complement C3 precursor                                                                                                    | C3       | P01026 | 5 (11)           | Secreted proteins                                  |     | P    |
| Contactin-1 precursor                                                                                                      | CNTN1    | Q63198 | 2 (2)            | Signaling proteins                                 | GPI | P    |
| Core histone macro-H2A.1                                                                                                   | H2AFY    | Q02874 | 3 (4)            | Nuclear proteins                                   |     | P    |
| Corticosteroid 11-beta-dehydrogenase isozyme 2                                                                             | HSD11B2  | P50233 | 5 (6)            | Steroid metabolizing enzymes                       |     | I    |
| Creatine kinase, ubiquitous mitochondrial precursor                                                                        | CKMT1    | P25809 | 1 (1)            | Metabolism proteins                                |     | I    |
| Cytochrome b5 outer mitochondrial membrane isoform precursor                                                               | CYB5M    | P04166 | 1 (2)            | Metabolism proteins                                |     | P    |
| Cytochrome c oxidase subunit 2                                                                                             | MTCO2    | P00406 | 1 (1)            | Metabolism proteins                                | III | I    |
| Cytochrome c oxidase subunit 4 isoform 1, mitochondrial precursor                                                          | COX4I1   | P10888 | 1 (1)            | Metabolism proteins                                |     | P    |
| Cytoplasmic dynein 1 intermediate chain 2                                                                                  | DYNC1I2  | Q62871 | 1 (1)            | Cytoskeletal proteins and linkers/molecular motors |     | I    |
| Cytosolic acyl coenzyme A thioester hydrolase                                                                              | ACOT7    | Q64559 | 1 (2)            | Metabolism proteins                                |     | P    |
| D-beta-hydroxybutyrate dehydrogenase, mitochondrial precursor                                                              | BDH1     | P29147 | 1 (1)            | Miscellaneous proteins                             |     | I    |
| Desmin                                                                                                                     | DES      | P48675 | 3 (4)            | Cytoskeletal proteins and linkers/molecular motors |     | P    |
| Dihydrolipoyllysine-residue acetyltransferase component of pyruvate dehydrogenase complex                                  | DLAT     | P08461 | 2 (4)            | Metabolism proteins                                |     | I    |
| Dihydrolipoyllysine-residue succinyltransferase component of 2-oxoglutarate dehydrogenase complex, mitochondrial precursor | DLST     | Q01205 | 1 (1)            | Metabolism proteins                                |     | I    |
| Dihydropyridine-sensitive L-type, calcium channel alpha-2/delta subunits precursor                                         | CACNA2D1 | P54290 | 7 (24)           | Transporters and channels                          | III | P    |
| Disks large homolog 1                                                                                                      | DLG1     | Q62696 | 7 (13)           | Anchor scaffold proteins                           |     | P    |
| Dynein heavy chain, cytosolic                                                                                              | DYNC1H1  | P38650 | 9 (11)           | Cytoskeletal proteins and linkers/molecular motors |     | I    |
| Elongation factor 1-alpha 2                                                                                                | EEF1A2   | P62632 | 4 (6),<br>4 (11) | Biosynthetic proteins                              |     | P, I |



|                                                             |         |        |                       |                                                    |      |
|-------------------------------------------------------------|---------|--------|-----------------------|----------------------------------------------------|------|
| Elongation factor 2                                         | EEF2    | P05197 | 3 (3)                 | Biosynthetic proteins                              | I    |
| Enoyl-CoA hydratase, mitochondrial precursor                | ECHS1   | P14604 | 3 (3)                 | Biosynthetic proteins                              | I    |
| Epithelial-cadherin precursor                               | CDH1    | Q9R0T4 | 5 (78)                | Adhesion proteins and collagens                    | I P  |
| Fatty aldehyde dehydrogenase                                | ALDH3A2 | P30839 | 1 (2)                 | Metabolism proteins                                | I    |
| Fibrinogen beta chain precursor                             | FGB     | P14480 | 3 (5)                 | Secreted proteins                                  | P    |
| Fructose-bisphosphate aldolase A                            | ALDOA   | P05065 | 2 (2)                 | Metabolism proteins                                | I    |
| Fumarate hydratase, mitochondrial precursor                 | FH      | P14408 | 2 (2)                 | Metabolism proteins                                | I    |
| Galectin-3                                                  | LGALS3  | P08699 | 1 (4)                 | Adhesion proteins and collagens                    | P    |
| Gamma-enolase                                               | ENO2    | P07323 | 2 (2)                 | Metabolism proteins                                | I    |
| Glial fibrillary acidic protein, astrocyte                  | GFAP    | P47819 | 3 (77),<br>1 (19)     | Cytoskeletal proteins and linkers/molecular motors | P, I |
| Glutamate dehydrogenase 1, mitochondrial precursor          | GLUD1   | P10860 | 5 (5)                 | Metabolism proteins                                | I    |
| Glutaminase kidney isoform, mitochondrial precursor         | GLS     | P13264 | 2 (3)                 | Metabolism proteins                                | I    |
| Glutathione peroxidase 1                                    | GPX1    | P04041 | 21<br>(102),<br>1 (1) | Stress proteins                                    | P, I |
| Glutathione peroxidase 2                                    | GPX2    | P83645 | 2 (5)                 | Stress proteins                                    | P    |
| Glutathione peroxidase 3 precursor                          | GPX3    | P23764 | 9 (38)                | Secreted proteins                                  | P    |
| Glutathione peroxidase 6 precursor                          | GPX6    | Q64625 | 3 (5)                 | Stress proteins                                    | P    |
| Glutathione S-transferase Mu 2                              | GSTM2   | P08010 | 1 (1)                 | Stress proteins                                    | I    |
| Glyceraldehyde-3-phosphate dehydrogenase                    | GAPDH   | P04797 | 7 (17)                | Metabolism proteins                                | I    |
| Glycerol kinase                                             | GK      | Q63060 | 1 (1)                 | Metabolism proteins                                | I    |
| Glycerol-3-phosphate dehydrogenase, mitochondrial precursor | GPD2    | P35571 | 2 (4)                 | Metabolism proteins                                | I    |
| Glycogen phosphorylase, brain form                          | PYGB    | P53534 | 5 (6)                 | Metabolism proteins                                | I    |
| Golgi apparatus protein 1 precursor                         | GLG1    | Q62638 | 2 (2)                 | Biosynthetic proteins                              | P    |

|                                                          |          |        |                    |                                                 |      |
|----------------------------------------------------------|----------|--------|--------------------|-------------------------------------------------|------|
| Golgi resident protein GCP60                             | ACBD3    | Q7TNY6 | 3 (4)              | Biosynthetic proteins                           | P    |
| GTP-binding nuclear protein Ran                          | RAN      | P62828 | 1 (1)              | Small GTP binding proteins and related proteins | I    |
| Guanine nucleotide-binding protein alpha-11 subunit      | GNA11    | Q9JID2 | 3 (3)              | Heterotrimeric G proteins                       | I    |
| Guanine nucleotide-binding protein beta subunit 2-like 1 | GNB2L1   | P63245 | 1 (1)              | Heterotrimeric G proteins                       | I    |
| Guanine nucleotide-binding protein beta subunit 4        | GNB4     | O35353 | 2 (6)              | Heterotrimeric G-proteins                       | P    |
| Guanine nucleotide-binding protein G                     | GNAI2    | P04897 | 1 (1),<br>7 (8)    | Heterotrimeric G proteins                       | P, I |
| Guanine nucleotide-binding protein G                     | GNAI3    | P08753 | 1 (2)              | Heterotrimeric G-proteins                       | P    |
| Guanine nucleotide-binding protein G                     | GNAQ     | P82471 | 2 (2)              | Heterotrimeric G proteins                       | I    |
| Guanine nucleotide-binding protein G                     | GNB1     | P54311 | 1 (2)              | Heterotrimeric G-proteins                       | P    |
| Guanine nucleotide-binding protein G                     | GNB2     | P54313 | 1 (2),<br>3 (3)    | Heterotrimeric G proteins                       | P, I |
| Heat shock 70 kDa protein 1A/1B                          | HSPA1A   | Q07439 | 4 (9),<br>12 (26)  | Chaperones                                      | P, I |
| Heat shock cognate 71 kDa protein                        | HSPA8    | P63018 | 15 (30),<br>6 (10) | Chaperones                                      | P, I |
| Heat shock protein HSP 90-beta                           | HSP90AB1 | P34058 | 10 (11)            | Chaperones                                      | I    |
| Heat shock-related 70 kDa protein 2                      | HSPA2    | P14659 | 1 (1),<br>4 (4)    | Chaperones                                      | P, I |
| Heat-shock protein beta-1                                | HSPB1    | P42930 | 6 (10)             | Chaperones                                      | I    |
| Heme oxygenase 2                                         | HMOX2    | P23711 | 1 (1)              | Miscellaneous proteins                          | I    |
| Hemoglobin alpha-1/2 subunit                             | HBA1     | P01946 | 5 (8)              | Binding proteins                                | P    |
| Hemoglobin beta-1 subunit                                | HBB      | P02091 | 2 (13)             | Binding proteins                                | P    |
| Hemoglobin beta-2 subunit                                |          | P11517 | 4 (15)             | Binding proteins                                | P    |
| Heterogeneous nuclear ribonucleoprotein A1               | HNRPA1   | P04256 | 1 (2)              | Nuclear proteins                                | I    |
| Heterogeneous nuclear ribonucleoprotein A3               | HNRPA3   | Q6URK4 | 3 (3)              | Nuclear proteins                                | I    |
| Heterogeneous nuclear ribonucleoprotein D0               | HNRPD    | Q9JJ54 | 2 (3)              | Nuclear proteins                                | I    |
| Heterogeneous nuclear ribonucleoprotein K                | HNRPK    | P61980 | 3 (4)              | Nuclear proteins                                | I    |
| Hexokinase-1                                             | HK1      | P05708 | 2 (3)              | Metabolism proteins                             | I    |

|                                                             |               |        |                     |                                                             |     |      |
|-------------------------------------------------------------|---------------|--------|---------------------|-------------------------------------------------------------|-----|------|
| Histone H1.0                                                | H1F0          | P43278 | 1 (1)               | Nuclear proteins                                            |     | I    |
| Histone H1.2                                                | HIST1H1C      | P15865 | 1 (1)               | Nuclear proteins                                            |     | I    |
| Histone H2B                                                 |               | Q00715 | 2 (2)               | Nuclear proteins                                            |     | P    |
| Histone H2B, testis                                         | HIST1H2B<br>A | Q00729 | 1 (3),<br>1 (1)     | Nuclear proteins                                            |     | P, I |
| Histone H4                                                  | HIST1H4B      | P62804 | 3 (12),<br>1 (1)    | Nuclear proteins                                            |     | P, I |
| Hydroxymethylglutaryl-CoA<br>lyase, mitochondrial precursor | HMGCL         | P97519 | 1 (1)               | Metabolism<br>proteins                                      |     | I    |
| Ig kappa chain C region, A allele                           |               | P01836 | 2 (4)               | Secreted proteins                                           |     | P    |
| Ig kappa chain C region, B allele                           |               | P01835 | 2 (5)               | Secreted proteins                                           |     | P    |
| Inositol 1,4,5-trisphosphate<br>receptor 1                  | ITPR1         | P29994 | 1 (2)               | Transporters and<br>channels                                | III | I    |
| Inositol 1,4,5-trisphosphate<br>receptor 2                  | ITPR2         | P29995 | 1 (1)               | Transporters and<br>channels                                | III | I    |
| Integrin alpha-1 precursor                                  | ITGA1         | P18614 | 2 (2)               | Adhesion proteins<br>and collagens                          | I   | I    |
| Intercellular adhesion molecule 1<br>precursor              | ICAM1         | Q00238 | 1 (1)               | Adhesion proteins<br>and collagens                          | I   | I    |
| Interferon-induced GTP-binding<br>protein Mx2               | MX2           | P18589 | 1 (1)               | Membrane<br>trafficking proteins                            |     | I    |
| Interferon-induced GTP-binding<br>protein Mx3               | MX3           | P18590 | 1 (1)               | Membrane<br>trafficking proteins                            |     | I    |
| Isovaleryl-CoA dehydrogenase,<br>mitochondrial precursor    | IVD           | P12007 | 2 (4)               | Metabolism<br>proteins                                      |     | I    |
| Keratin, II cytoskeletal 8                                  | KRT8          | Q10758 | 9 (29)              | Cytoskeletal<br>proteins and<br>linkers/molecular<br>motors |     | I    |
| Keratin, type I cytoskeletal 19                             | KRT19         | Q63279 | 15 (81),<br>15 (12) | Cytoskeletal<br>proteins and<br>linkers/molecular<br>motors |     | P, I |
| Keratin, type I cytoskeletal 20                             | KRT20         | P25030 | 4 (65),<br>2 (5)    | Cytoskeletal<br>proteins and<br>linkers/molecular<br>motors |     | P, I |
| Kinesin-like protein KIF2C                                  | KIF2C         | Q62909 | 2 (4)               | Cytoskeletal<br>proteins and<br>linkers/molecular<br>motors |     | P    |
| Lamin-A                                                     | LMNA          | P48679 | 3 (3),<br>5 (7)     | Cytoskeletal<br>proteins and<br>linkers/molecular<br>motors |     | P, I |

|                                                                                                  |          |        |                  |                                                    |     |            |
|--------------------------------------------------------------------------------------------------|----------|--------|------------------|----------------------------------------------------|-----|------------|
| Lamin-B1                                                                                         | LMNB1    | P70615 | 7 (15),<br>1 (2) | Cytoskeletal proteins and linkers/molecular motors |     | P, I       |
| Laminin beta-2 chain precursor                                                                   | LAMB2    | P15800 | 2 (3),<br>2 (2)  | Adhesion proteins and collagens                    |     | P, I       |
| LIN-7 homolog A                                                                                  | LIN7A    | Q9Z250 | 1 (1)            | Anchor scaffold proteins                           |     | P          |
| LIN-7 homolog C                                                                                  | LIN7C    | Q792I0 | 5 (7)            | Anchor scaffold proteins                           |     | P          |
| Lipid phosphate phosphohydrolase 3                                                               | PPAP2B   | P97544 | 1 (2)            | Metabolism proteins                                | III | I          |
| L-lactate dehydrogenase A chain                                                                  | LDHA     | P04642 | 3 (3)            | Metabolism proteins                                |     | I          |
| L-lactate dehydrogenase B chain                                                                  | LDHB     | P42123 | 1 (1)            | Metabolism proteins                                |     | I          |
| Lysosome-associated membrane glycoprotein 1 precursor                                            | LAMP1    | P14562 | 1 (1)            | Membrane trafficking proteins                      | I   | I          |
| Malate dehydrogenase, mitochondrial precursor                                                    | MDH2     | P04636 | 9 (32)           | Metabolism proteins                                |     | I          |
| Merlin                                                                                           | NF2      | Q63648 | 1 (2)            | Cytoskeletal proteins and linkers/molecular motors |     | P          |
| Methylmalonate-semialdehyde dehydrogenase [acylating], mitochondrial precursor                   | ALDH6A1  | Q02253 | 5 (7)            | Metabolism proteins                                |     | I          |
| Mitochondrial 2-oxoglutarate/malate carrier protein                                              | SLC25A11 | P97700 | 2 (3)            | Transporters and channels                          | III | I          |
| Moesin                                                                                           | MSN      | O35763 | 2 (2),<br>3 (3)  | Cytoskeletal proteins and linkers/molecular motors |     | P, I       |
| Monocarboxylate transporter 2, MCT2                                                              | SLC16A7  | Q63344 | 1 (2)            | Transporters and channels                          | III | I (RT-PCR) |
| Monocyte differentiation antigen CD14 precursor                                                  | CD14     | Q63691 | 3 (6)            | Signaling proteins                                 | GPI | P          |
| Monoglyceride lipase                                                                             | MGLL     | Q8R431 | 1 (1)            | Metabolism proteins                                |     | I          |
| Multifunctional protein ADE2 [Includes: Phosphoribosylaminoimidazole-succinocarboxamide synthase | PAICS    | P51583 | 2 (3)            | Biosynthetic proteins                              |     | I          |
| Myosin heavy chain, fast skeletal muscle, embryonic                                              | MYH3     | P12847 | 1 (1)            | Cytoskeletal proteins and linkers/molecular motors |     | I          |

|                                                                                                         |          |        |                        |                                                    |      |
|---------------------------------------------------------------------------------------------------------|----------|--------|------------------------|----------------------------------------------------|------|
| Myosin Ib                                                                                               | MYO1A    | Q05096 | 3 (4)                  | Cytoskeletal proteins and linkers/molecular motors | I    |
| Myosin Id                                                                                               | MYO1D    | Q63357 | 1 (1),<br>6 (9)        | Cytoskeletal proteins and linkers/molecular motors | P, I |
| Myosin Ie                                                                                               | MYO1E    | Q63356 | 2 (2)                  | Cytoskeletal proteins and linkers/molecular motors | I    |
| Myosin light polypeptide 6                                                                              | MYL6     | Q64119 | 1 (3)                  | Cytoskeletal proteins and linkers/molecular motors | I    |
| Myosin-10                                                                                               | MYH10    | Q9JLT0 | 4 (18),<br>71<br>(141) | Cytoskeletal proteins and linkers/molecular motors | P, I |
| Myosin-11                                                                                               | MYH11    | Q63862 | 7 (33)                 | Cytoskeletal proteins and linkers/molecular motors | I    |
| Myosin-5B                                                                                               | MYO5B    | P70569 | 1 (1)                  | Cytoskeletal proteins and linkers/molecular motors | I    |
| Myosin-9                                                                                                | MYH9     | Q62812 | 67<br>(137)            | Cytoskeletal proteins and linkers/molecular motors | I    |
| Na(+)/H(+) exchange regulatory cofactor NHE-RF2 (NHERF-2) (Tyrosine kinase activator protein 1) (TKA-1) | SLC9A3R2 | Q920G2 | 1 (1)                  | Cytoskeletal proteins and linkers/molecular motors | I    |
| NADH-ubiquinone oxidoreductase 24 kDa subunit, mitochondrial precursor                                  | NDUFV2   | P19234 | 1 (1)                  | Metabolism proteins                                | I    |
| Neurabin-2                                                                                              | PPP1R9B  | O35274 | 1 (2)                  | Cytoskeletal proteins and linkers/molecular motors | P    |
| Neurofilament triplet H protein                                                                         | NEFH     | P16884 | 1 (1)                  | Cytoskeletal proteins and linkers/molecular motors | I    |
| Nuclease sensitive element-binding protein 1                                                            | YBX1     | P62961 | 1 (1)                  | Miscellaneous proteins                             | I    |

|                                                               |         |        |                 |                                                    |     |            |
|---------------------------------------------------------------|---------|--------|-----------------|----------------------------------------------------|-----|------------|
| Nucleolin                                                     | NCL     | P13383 | 1 (1)           | Nuclear proteins                                   |     | I          |
| Ornithine aminotransferase, mitochondrial precursor           | OAT     | P04182 | 1 (1)           | Biosynthetic proteins                              |     | I          |
| Peripherin                                                    | PRPH    | P21807 | 3 (15)          | Cytoskeletal proteins and linkers/molecular motors |     | P          |
| Peroxiredoxin-1                                               | PRDX1   | Q63716 | 3 (5)           | Stress proteins                                    |     | P          |
| Peroxiredoxin-5, mitochondrial precursor                      | PRDX5   | Q9R063 | 1 (1)           | Stress proteins                                    |     | P          |
| Peroxiredoxin-6                                               | PRDX6   | O35244 | 2 (2)           | Stress proteins                                    |     | I          |
| Peroxisomal multifunctional enzyme 2                          | HSD17B4 | P97852 | 5 (6)           | Metabolism proteins                                |     | I          |
| Phosphate carrier protein, mitochondrial precursor            | SLC25A3 | P16036 | 2 (5)           | Transporters and channels                          | III | I          |
| Phosphoglycerate kinase 1                                     | PGK1    | P16617 | 1 (1)           | Metabolism proteins                                |     | I          |
| Phospholipid hydroperoxide glutathione peroxidase, nuclear    | GPX4    | Q91XR8 | 5 (18)          | Stress proteins                                    |     | P          |
| Plastin-3                                                     | PLS3    | Q63598 | 3 (4)           | Cytoskeletal proteins and linkers/molecular motors |     | I          |
| Plectin 1                                                     | PLEC1   | P30427 | 9 (11)          | Cytoskeletal proteins and linkers/molecular motors |     | I          |
| Podocalyxin precursor                                         | PODXL   | Q9WTQ2 | 1 (1)           | Adhesion proteins and collagens                    | I   | I (RT-PCR) |
| Potassium-transporting ATPase alpha chain 2                   | ATP12A  | P54708 | 2 (3)           | Ion pumps                                          | III | I          |
| Profilin-1                                                    | PFN1    | P62963 | 1 (2)           | Cytoskeletal proteins and linkers/molecular motors |     | I          |
| Programmed cell death protein 8, mitochondrial precursor      | PDCD8   | Q9JM53 | 1 (1),<br>6 (8) | Apoptosis proteins                                 |     | P, I       |
| Prohibitin                                                    | PHB     | P67779 | 5 (6)           | Miscellaneous proteins                             |     | I          |
| Propionyl-CoA carboxylase beta chain, mitochondrial precursor | PCCB    | P07633 | 5 (8),<br>4 (5) | Metabolism proteins                                |     | P, I       |
| Prostaglandin G/H synthase 1 precursor                        | PTGS1   | Q63921 | 3 (5)           | Signaling proteins                                 |     | I          |
| Prostasin precursor                                           | PRSS8   | Q9ES87 | 1 (2)           | Metabolism proteins                                |     | P          |

|                                                                                          |          |        |                 |                                                 |     |      |
|------------------------------------------------------------------------------------------|----------|--------|-----------------|-------------------------------------------------|-----|------|
| Protein disulfide-isomerase A3 precursor                                                 | PDIA3    | P11598 | 14 (24)         | Biosynthetic proteins                           |     | I    |
| Protein disulfide-isomerase A4 precursor                                                 | PDIA4    | P38659 | 3 (3)           | Biosynthetic proteins                           |     | I    |
| Protein disulfide-isomerase A6 precursor                                                 | PDIA6    | Q63081 | 2 (2),<br>4 (4) | Biosynthetic proteins                           |     | P, I |
| Protein disulfide-isomerase precursor                                                    | P4HB     | P04785 | 6 (7),<br>6 (6) | Biosynthetic proteins                           |     | P, I |
| Protein KIAA0152 precursor                                                               | KIAA0152 | Q5FVQ4 | 1 (2)           | Miscellaneous proteins                          | I   | P    |
| Pyruvate dehydrogenase E1 component alpha subunit, somatic form, mitochondrial precursor | PDHA1    | P26284 | 2 (5)           | Metabolism proteins                             |     | I    |
| Pyruvate dehydrogenase E1 component beta subunit, mitochondrial precursor                | PDHB     | P49432 | 4 (6)           | Metabolism proteins                             |     | I    |
| Pyruvate kinase isozymes M1/M2                                                           | PKM2     | P11980 | 14 (28)         | Metabolism proteins                             |     | I    |
| Ras-related protein Rab-14                                                               | RAB14    | P61107 | 2 (3)           | Small GTP binding proteins and related proteins |     | I    |
| Ras-related protein Rab-1A                                                               | RAB1A    | Q6NYB7 | 1 (1)           | Small GTP binding proteins and related proteins |     | I    |
| Ras-related protein Rab-7                                                                | RAB7     | P09527 | 2 (2)           | Small GTP binding proteins and related proteins |     | I    |
| Reticulon-4                                                                              | RTN4     | Q9JK11 | 8 (24)          | Membrane trafficking proteins                   | III | I    |
| Retinal dehydrogenase 1                                                                  | ALDH1A1  | P51647 | 4 (4)           | Metabolism proteins                             |     | I    |
| S100 calcium-binding protein A4                                                          | S100A4   | P05942 | 1 (1)           | Biosynthetic proteins                           |     | I    |
| Serine/threonine-protein phosphatase 2A catalytic subunit alpha isoform                  | PPP2CA   | P63331 | 3 (4)           | Protein phosphatases                            |     | P    |
| Serine/threonine-protein phosphatase PP1-alpha catalytic subunit                         | PPP1CA   | P62138 | 4 (7)           | Protein phosphatases                            |     | P    |
| Serine/threonine-protein phosphatase PP1-beta catalytic subunit                          | PPP1CB   | P62142 | 3 (6)           | Protein phosphatases                            |     | P    |
| Serine/threonine-protein phosphatase PP1-gamma catalytic subunit                         | PPP1CC   | P63088 | 9 (14)          | Protein phosphatases                            |     | P    |
| Serum albumin precursor                                                                  | ALB      | P02770 | 6 (7)           | Secreted proteins                               |     | I    |

|                                                                                    |        |        |                    |                                                    |     |      |
|------------------------------------------------------------------------------------|--------|--------|--------------------|----------------------------------------------------|-----|------|
| Short chain 3-hydroxyacyl-CoA dehydrogenase, mitochondrial precursor               | HADHSC | Q9WVK7 | 2 (2)              | Metabolism proteins                                |     | I    |
| Sideroflexin-3                                                                     | SFXN3  | Q9JHY2 | 3 (4)              | Transporters and channels                          | III | I    |
| Sodium/potassium-transporting ATPase alpha-1 chain precursor                       | ATP1A1 | P06685 | 26 (134)           | Ion pumps                                          | III | I    |
| Sodium/potassium-transporting ATPase alpha-3 chain                                 | ATP1A3 | P06687 | 15 (63)            | Ion pumps                                          | III | I    |
| Sodium/potassium-transporting ATPase alpha-4 chain                                 | ATP1A4 | Q64541 | 2 (3)              | Ion pumps                                          | III | I    |
| Sodium/potassium-transporting ATPase beta-1 chain                                  | ATP1B1 | P07340 | 6 (14)             | Ion pumps                                          | II  | I    |
| Sodium/potassium-transporting ATPase beta-3 chain                                  | ATP1B3 | Q63377 | 1 (3)              | Ion pumps                                          | II  | I    |
| Sodium/potassium-transporting ATPase gamma chain                                   | FXYD2  | Q04679 | 1 (1)              | Ion pumps                                          | II  | I    |
| Spectrin alpha chain, brain                                                        | SPTAN1 | P16086 | 81 (157), 70 (151) | Cytoskeletal proteins and linkers/molecular motors |     | P, I |
| Spectrin beta chain, brain 2                                                       | SPTBN2 | Q9QWN8 | 51 (94)            | Cytoskeletal proteins and linkers/molecular motors |     | I    |
| S-phase kinase-associated protein 1A                                               | SKP1A  | Q6PEC4 | 1 (2)              | Protein degradation pathway                        |     | P    |
| Stress-70 protein, mitochondrial precursor                                         | HSPA9  | P48721 | 14 (16)            | Chaperones                                         |     | P, I |
| Succinate dehydrogenase [ubiquinone] flavoprotein subunit, mitochondrial precursor | SDHA   | Q920L2 | 1 (1)              | Metabolism proteins                                |     | P    |
| Succinate dehydrogenase [ubiquinone] flavoprotein subunit, mitochondrial precursor | SDHA   | Q920L2 | 3 (4)              | Metabolism proteins                                |     | I    |
| Succinyl-CoA ligase [GDP-forming] alpha-chain, mitochondrial precursor             | SUCLG1 | P13086 | 1 (1)              | Miscellaneous proteins                             |     | I    |
| Superoxide dismutase [Mn], mitochondrial precursor                                 | SOD2   | P07895 | 1 (1)              | Stress proteins                                    |     | P    |
| Syntaxin-7                                                                         | STX7   | O70257 | 1 (1)              | Membrane trafficking proteins                      | II  | I    |
| T-cell surface glycoprotein CD1d precursor                                         | CD1D   | Q63493 | 1 (1)              | Adhesion proteins and collagens                    | I   | I    |
| T-complex protein 1 subunit alpha                                                  | CCT1   | P28480 | 1 (1)              | Chaperones                                         |     | I    |



|                                                                               |          |        |                 |                                                    |     |      |
|-------------------------------------------------------------------------------|----------|--------|-----------------|----------------------------------------------------|-----|------|
| Thy-1 membrane glycoprotein precursor                                         | THY1     | P01830 | 2 (5)           | Adhesion proteins and collagens                    | GPI | P    |
| Timeless homolog                                                              | TIMELESS | Q9Z2Y1 | 2 (2)           | Nuclear proteins                                   |     | P    |
| Transitional endoplasmic reticulum ATPase                                     | VCP      | P46462 | 3 (3)           | Membrane trafficking proteins                      |     | I    |
| Transketolase                                                                 | TKT      | P50137 | 1 (1)           | Metabolism proteins                                |     | I    |
| Transthyretin precursor                                                       | TTR      | P02767 | 2 (2)           | Secreted proteins                                  |     | P    |
| Trifunctional enzyme alpha subunit, mitochondrial precursor                   | HADHA    | Q64428 | 13 (16)         | Metabolism proteins                                |     | I    |
| Trifunctional enzyme beta subunit, mitochondrial precursor                    | HADHB    | Q60587 | 2 (2)           | Metabolism proteins                                |     | I    |
| Triosephosphate isomerase                                                     | TPI1     | P48500 | 4 (6),<br>5 (6) | Biosynthetic proteins                              |     | P, I |
| Tropomyosin 1 alpha chain                                                     | TPM1     | P04692 | 6 (9),<br>3 (4) | Cytoskeletal proteins and linkers/molecular motors |     | P, I |
| Tropomyosin alpha-4 chain                                                     | TPM4     | P09495 | 3 (3)           | Cytoskeletal proteins and linkers/molecular motors |     | I    |
| Tropomyosin beta chain                                                        | TPM2     | P58775 | 1 (1)           | Cytoskeletal proteins and linkers/molecular motors |     | I    |
| Tubulin alpha-1 chain                                                         | TUBA1    | P68370 | 11 (29)         | Cytoskeletal proteins and linkers/molecular motors |     | I    |
| Tubulin alpha-2 chain                                                         | TUBA2    | Q6P9V9 | 3 (7)           | Cytoskeletal proteins and linkers/molecular motors |     | I    |
| Tubulin alpha-6 chain                                                         | TUBA6    | Q6AYZ1 | 1 (1)           | Cytoskeletal proteins and linkers/molecular motors |     | I    |
| Tubulin beta chain                                                            |          | P04691 | 3 (10)          | Cytoskeletal proteins and linkers/molecular motors |     | I    |
| Tubulointerstitial nephritis antigen-like precursor                           | TINAGL1  | Q9EQT5 | 1 (3)           | Secreted proteins                                  |     | P    |
| Ubiquinol-cytochrome c reductase iron-sulfur subunit, mitochondrial precursor | UQCRFS1  | P20788 | 1 (1)           | Metabolism proteins                                |     | I    |

|                                                                                  |          |        |                    |                                                    |     |            |
|----------------------------------------------------------------------------------|----------|--------|--------------------|----------------------------------------------------|-----|------------|
| Ubiquinol-cytochrome-c reductase complex core protein 2, mitochondrial precursor | UQCRC2   | P32551 | 10 (26)            | Metabolism proteins                                |     | I          |
| Ubiquitin                                                                        | RPS27A   | P62989 | 4 (23),<br>1 (9)   | Protein degradation pathway                        |     | P, I       |
| Unc-13 homolog D                                                                 | UNC13D   | Q9R189 | 2 (3)              | Membrane trafficking proteins                      |     | P          |
| Uromodulin precursor                                                             | UMOD     | P27590 | 1 (1)              | Miscellaneous proteins                             | GPI | P          |
| Vacuolar ATP synthase subunit B, brain isoform                                   | ATP6V1B2 | P62815 | 2 (2)              | Metabolism proteins                                |     | I          |
| Versican core protein precursor                                                  | CSPG2    | Q9ERB4 | 2 (2)              | Secreted proteins                                  |     | P          |
| Vesicle-associated membrane protein-associated protein A                         | VAPA     | Q9Z270 | 1 (1)              | Membrane trafficking proteins                      | II  | I (RT-PCR) |
| Vimentin                                                                         | VIM      | P31000 | 39 (230),<br>2 (2) | Cytoskeletal proteins and linkers/molecular motors |     | P, I       |
| Voltage-dependent anion-selective channel protein 1                              | VDAC1    | Q9Z2L0 | 7 (23),<br>4 (5)   | Transporters and channels                          | III | P, I       |
| Voltage-dependent anion-selective channel protein 2                              | VDAC2    | P81155 | 11 (46),<br>4 (8)  | Transporters and channels                          | III | P, I       |

a, Number of peptides identified with their total hit number in the parenthesis; b, Collecting duct database (CDDb) family group names; c, Membrane protein types: I, one membrane spanning helix with an extracellular N'-terminus; II, one membrane spanning helix with an extracellular C'-terminus; III, multiple membrane spanning helices; GPI, glycosylphosphatidylinositol-linked; d, Protein identified in perfusion (P) and/or incubation (I) biotinylation method. Identifications confirmed by RT-PCR are indicated.

Table S-1. Selected examples of accepted spectra of single-peptide identifications in the inner medullary collecting ducts (IMCDs).

| Protein name <sup>a</sup>                                                             | Charge +1 <sup>b</sup>                                                              | Charge +2                                                                            | Charge +3                                                                             | Confirmed <sup>c</sup> |
|---------------------------------------------------------------------------------------|-------------------------------------------------------------------------------------|--------------------------------------------------------------------------------------|---------------------------------------------------------------------------------------|------------------------|
| Fixed perfusion-biotinylated IMCDs                                                    |                                                                                     |                                                                                      |                                                                                       |                        |
| ACE<br>R.VAEFFFTSLGLSPM*PPEF<br>WAESMLEK#.P<br>Xcorr: 2.8; $\Delta$ Cn: 0.1; Rsp: 5   |    |    |    | RT-PCR                 |
| APC<br>R.NDSLSSLDFFFFDVLDR<br>EK.A<br>Xcorr: 3.0; $\Delta$ Cn: 0.2; Rsp: 6            |    |    |    | Negative               |
| Calcyclin<br>K.LQDAEIAR.L<br>Xcorr: 2.5; $\Delta$ Cn: 0.4; Rsp: 1                     |    |    |    | RT-PCR                 |
| CD40LG<br>K.REGLYYVYTQVTFCSNR.<br>E<br>Xcorr: 3.0; $\Delta$ Cn: 0.2; Rsp: 1           |   |   |   | Negative               |
| CLIC4<br>K.NSRPEANEALERGLLK.T<br>Xcorr: 2.8; $\Delta$ Cn: 0.1; Rsp: 1                 |  |  |  | RT-PCR                 |
| ERC2<br>K.IAELESLTLR.H<br>Xcorr: 3.41; $\Delta$ Cn: 0.4; Rsp: 3                       |  |  |  | Negative               |
| g H/K ATPase $\alpha$ 1<br>K.RIVIGDASETALLK.F<br>Xcorr: 3.9; $\Delta$ Cn: 0.5; Rsp: 1 |  |  |  | IF                     |
| GPR64<br>K.EDSCNGKSRMALR.R<br>Xcorr: 2.7; $\Delta$ Cn: 0.1; Rsp: 8                    |  |  |  | RT-PCR                 |

GRIN2D  
R.YWSVDKLGGR.A  
Xcorr: 2.5;  $\Delta$ Cn: 0.3; Rsp: 1

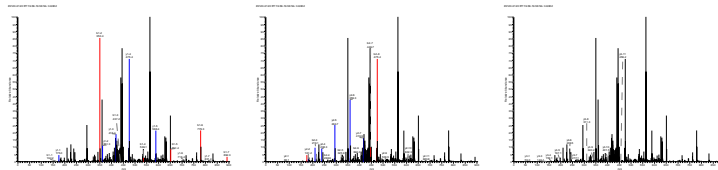

Negative

HCN1  
R.LGTPPGGAAGK#.E  
Xcorr: 2.9;  $\Delta$ Cn: 0.2; Rsp: 2

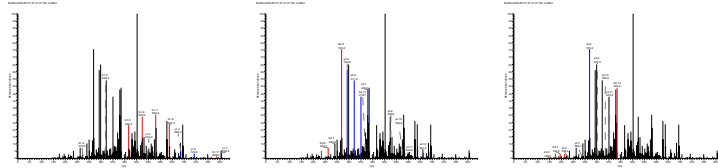

Negative

Kv4.3  
K.ELPCGERYSVAFFCLDTA  
CVMIFTVEYLLR.L  
Xcorr: 3.2;  $\Delta$ Cn: 0.3; Rsp: 2

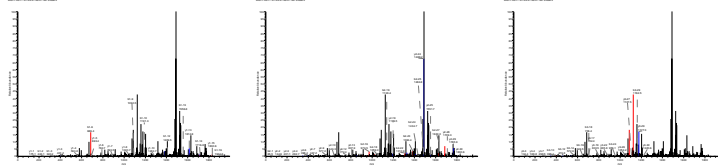

Negative

LPL  
K.GLGDVDQLVK#.C  
Xcorr: 2.1;  $\Delta$ Cn: 0.1; Rsp: 1

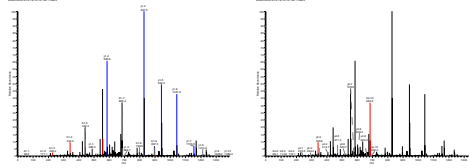

RT-PCR

LRP4  
K.FTGKNQEIR.N  
Xcorr: 2.2;  $\Delta$ Cn: 0.1; Rsp: 7

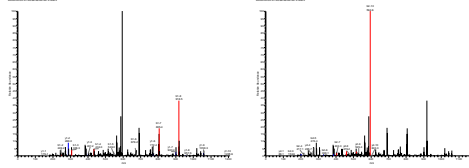

RT-PCR

MAPK12  
K.GLKYIHAAGVIHRDLK.P  
Xcorr: 3.0;  $\Delta$ Cn: 0.3; Rsp: 3

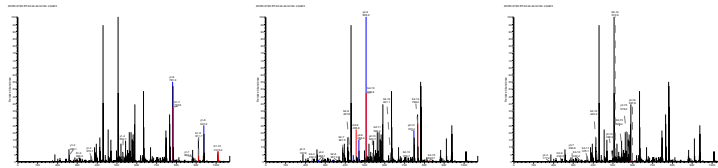

Negative

NHE2  
K.EGGTQTPGVLR.Q  
Xcorr: 2.4;  $\Delta$ Cn: 0.2; Rsp: 6

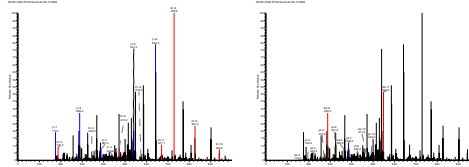

IF

PalmT  
R.KM\*DHHCPWVNNCVGE  
K.N  
Xcorr: 2.2;  $\Delta$ Cn: 0.2; Rsp: 3

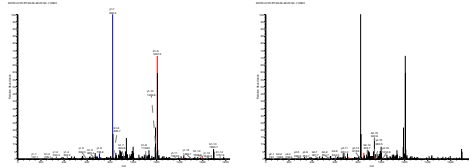

RT-PCR

PIK3-C2 $\gamma$   
R.DACSYFTSNALPLK.I  
Xcorr: 2.4;  $\Delta$ Cn: 0.5; Rsp: 10

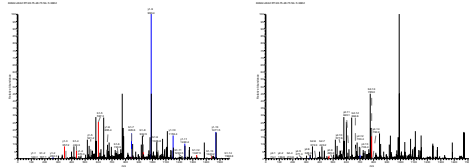

Negative

PIK3-C $\beta$   
 K.TVVSSEISGKNDHIWNEQ  
 LEFDINICDLPR.M  
 Xcorr: 2.6;  $\Delta$ Cn: 0.2; Rsp: 4



RT-PCR

PKA- $\beta$ C  
 M\*GNTAIAKKGSEVESVK.E  
 Xcorr: 2.8;  $\Delta$ Cn: 0.3; Rsp: 1

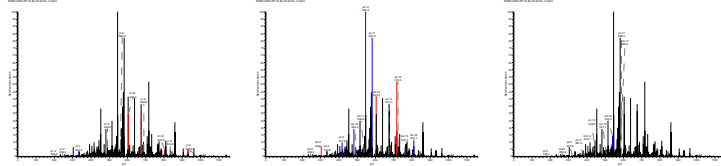

RT-PCR

Rab31  
 K.WVKELKEHGPENIVM\*AI  
 AGNK.C  
 Xcorr: 3.1;  $\Delta$ Cn: 0.2; Rsp: 1



RT-PCR

Rabaptin-5  
 R.QWREEVASLQAVMK#.E  
 Xcorr: 2.8;  $\Delta$ Cn: 0.1; Rsp: 7

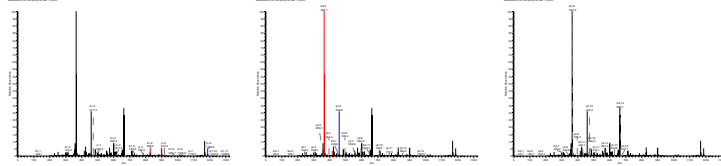

RT-PCR

S1P-R  
 R.SPSAVGPSGGGLR.R  
 Xcorr: 2.8;  $\Delta$ Cn: 0.2; Rsp: 4

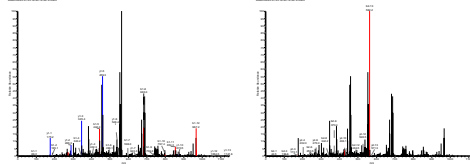

Negative

SCN5A  
 R.TSLLVPWPLR.H  
 Xcorr: 2.8;  $\Delta$ Cn: 0.2; Rsp: 1

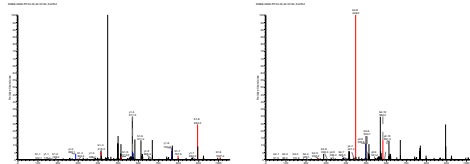

Negative

Septin-9  
 R.VDLGAK.A  
 Xcorr: 1.8;  $\Delta$ Cn: 0.2; Rsp: 1

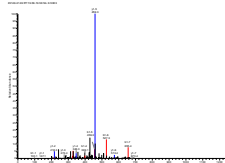

RT-PCR

SNAP29  
 K.MDQDLKM\*SQK.H  
 Xcorr: 2.2;  $\Delta$ Cn: 0.2; Rsp: 6

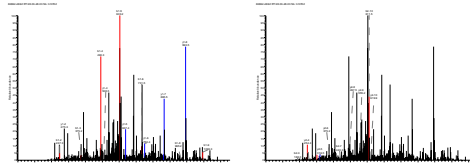

RT-PCR

TauT  
 R.GLTLPGAGEGIK.F  
 Xcorr: 2.1;  $\Delta$ Cn: 0.1; Rsp: 3

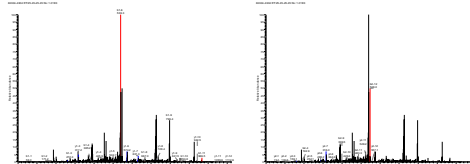

IF

THIK-1  
R.LSGEMISMK.D  
Xcorr: 2.1;  $\Delta$ Cn: 0.3; Rsp: 2



RT-PCR

TYRO3  
R.LPIPM\*VILPFMK#.H  
Xcorr: 2.5;  $\Delta$ Cn: 0.2; Rsp: 4



RT-PCR

VK $\gamma$ C  
R.TKLQDIK.S  
Xcorr: 2.3;  $\Delta$ Cn: 0.1; Rsp: 1



RT-PCR

WASPIP  
R.SGPLPPPPINR.N  
Xcorr: 2.4;  $\Delta$ Cn: 0.2; Rsp: 7



RT-PCR

---

Fixed incubation-biotinylated IMCDs

---

FZD1  
K.VYGLMYFGPEELR.F  
Xcorr: 4.0; 0.6;  $\Delta$ Cn: Rsp: 1

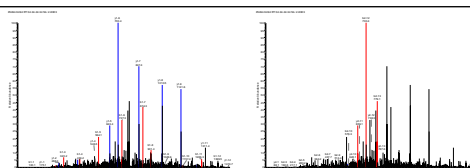

RT-PCR

ROMK K.RGGKLCLLIR.V  
Xcorr: 2.5;  $\Delta$ Cn: 0.1; Rsp: 1

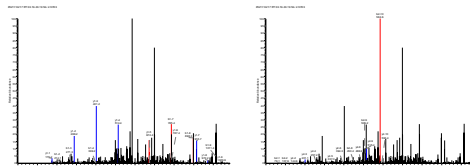

RT-PCR

Podocalyxin  
K.ASFKPAEDSCALELAPILD  
NQAVAVK.R  
Xcorr: 3.3;  $\Delta$ Cn: 0.4; Rsp: 1



RT-PCR

---

Non-fixed perfusion-biotinylated IMCDs

---

CA4  
K.NQQSPINIVTSK.T  
Xcorr: 3.1;  $\Delta$ Cn: 0.4; Rsp: 1

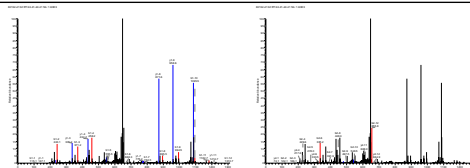

RT-PCR

CD59  
R.LEIANVQYR.C  
Xcorr: 3.5;  $\Delta$ Cn: 0.5; Rsp: 1



RT-PCR

---

 Non-fixed incubation-biotinylated IMCDs
 

---

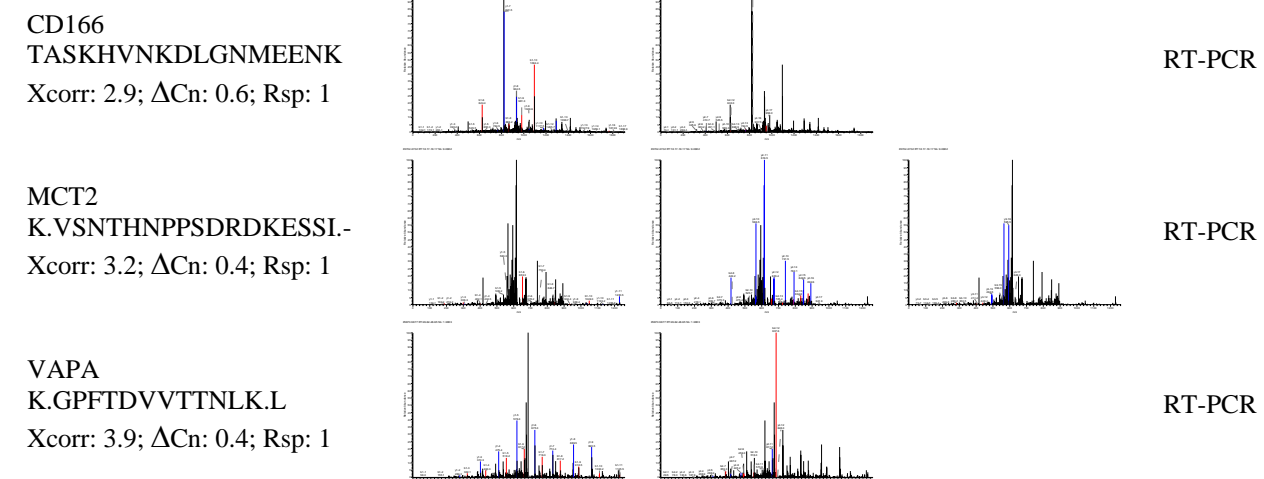

a. Identified proteins are abbreviated. The identified peptide sequence is shown with corresponding Xcorr,  $\Delta$ Cn, and Rsp scores. \* indicated methionine (M) oxidation. # indicates lysine (K) biotinylation. b. Accepted spectra of three charged states are shown. Color red indicates matches to b-ion series; blue indicates matched to y-ion series. c. Protein identifications were confirmed in IMCDs with immunofluorescence staining (IF) or RT-PCR. “Negative“ indicates no RT-PCR product at 30 cycles of amplification.

Table S-2. Proteins identified from the fixed perfusion-biotinylated inner medullary collecting ducts (IMCDs).

| Protein name                                             | Gene name | Accession | Ion (n) <sup>a</sup> | CDDB family <sup>b</sup>                           | Type <sup>c</sup> | Confirmed <sup>d</sup> |
|----------------------------------------------------------|-----------|-----------|----------------------|----------------------------------------------------|-------------------|------------------------|
| 14-3-3 protein zeta/delta                                | YWHAZ     | P63102    | 6 (15)               | Signaling proteins                                 |                   |                        |
| 3-hydroxyanthranilate 3,4-dioxygenase                    | HAAO      | P46953    | 1 (1)                | Biosynthetic proteins                              |                   |                        |
| 6-phosphofructo-2-kinase/fructose-2,6-biphosphatase 1    | PFKFB1    | P07953    | 1 (1)                | Metabolism proteins                                |                   |                        |
| Acetyl-CoA carboxylase 1                                 | ACACA     | P11497    | 1 (1)                | Metabolism proteins                                |                   |                        |
| Activity-dependent neuroprotector                        | ADNP      | Q9JKL8    | 1 (1)                | Nuclear proteins                                   |                   |                        |
| Adenomatous polyposis coli protein                       | APC       | P70478    | 1 (12)               | Signaling proteins                                 |                   |                        |
| Alcohol dehydrogenase                                    | AKR1A1    | P51635    | 2 (2)                | Metabolism proteins                                |                   |                        |
| Alpha-1-antitrypsin precursor                            | SERPINA1  | P17475    | 10 (12)              | Secreted proteins                                  |                   |                        |
| Alpha-actinin-4                                          | ACTN4     | Q9QXQ0    | 5 (9)                | Cytoskeletal proteins and linkers/molecular motors |                   |                        |
| Aminopeptidase N                                         | ANPEP     | P15684    | 2 (4)                | Aminopeptidases                                    | II                |                        |
| Angiotensin-converting enzyme, somatic isoform precursor | ACE       | P47820    | 1 (2)                | Signaling proteins                                 | I                 | RT-PCR                 |
| Annexin A1                                               | ANXA1     | P07150    | 5 (16)               | Membrane trafficking proteins                      |                   |                        |
| Annexin A2                                               | ANXA2     | Q07936    | 7 (15)               | Membrane trafficking proteins                      |                   |                        |
| Aspartate aminotransferase, cytoplasmic                  | GOT1      | P13221    | 1 (14)               | Metabolism proteins                                |                   |                        |
| ATP-binding cassette sub-family A member 2               | ABCA2     | Q9ESR9    | 2 (3)                | Transporters and channels                          | III               |                        |
| Baculoviral IAP repeat-containing protein 4              | BIRC4     | Q9R0I6    | 1 (7)                | Apoptosis proteins                                 |                   |                        |
| Bassoon protein                                          | BSN       | O88778    | 2 (4)                | Cytoskeletal proteins and linkers/molecular motors |                   |                        |
| Beta-glucuronidase precursor                             | GUSB      | P06760    | 20 (67)              | Protein degradation pathway                        |                   |                        |
| Bone morphogenetic protein 4 precursor                   | BMP4      | Q06826    | 1 (1)                | Secreted proteins                                  |                   |                        |



|                                                             |        |        |        |                                                    |     |        |
|-------------------------------------------------------------|--------|--------|--------|----------------------------------------------------|-----|--------|
| Calcyclin                                                   | S100A6 | P05964 | 1 (1)  | Binding proteins                                   |     | RT-PCR |
| cAMP-dependent protein kinase, beta-catalytic subunit       | PRKACB | P68182 | 1 (3)  | Protein kinases, serine/threonine                  |     | RT-PCR |
| Catalase                                                    | CAT    | P04762 | 1 (1)  | Stress proteins                                    |     |        |
| CD40 ligand                                                 | CD40LG | Q9Z2V2 | 1 (12) | Signaling proteins                                 | II  |        |
| Chloride intracellular channel protein 4                    | CLIC4  | Q9Z0W7 | 1 (1)  | Transporters and channels                          | III | RT-PCR |
| COUP transcription factor 2                                 | NR2F2  | O09018 | 1 (1)  | Nuclear receptors                                  |     |        |
| Creatine kinase M-type                                      | CKM    | P00564 | 1 (1)  | Metabolism proteins                                |     |        |
| Creatine kinase, sarcomeric mitochondrial precursor         | CKMT2  | P09605 | 3 (12) | Metabolism proteins                                |     |        |
| Cytochrome P450 4B1                                         | CYP4B1 | P15129 | 1 (1)  | Metabolism proteins                                |     |        |
| Cytosolic acyl coenzyme A thioester hydrolase               | ACOT7  | Q64559 | 1 (2)  | Metabolism proteins                                |     |        |
| Dihydropyrimidinase-related protein 1                       | CRMP1  | Q62950 | 1 (7)  | Miscellaneous proteins                             |     |        |
| Double-strand break repair protein MRE11A                   | MRE11A | Q9JIM0 | 1 (1)  | Nuclear proteins                                   |     |        |
| ERC protein 2                                               | ERC2   | Q8K3M6 | 1 (9)  | Cytoskeletal proteins and linkers/molecular motors |     |        |
| Ficolin-2 precursor                                         | FCN2   | P57756 | 1 (1)  | Secreted proteins                                  |     |        |
| Focal adhesion kinase 1                                     | PTK2   | O35346 | 1 (1)  | Protein kinases, tyrosine                          |     |        |
| Fos-related antigen 2                                       | FOSL2  | P51145 | 1 (1)  | Nuclear proteins                                   |     |        |
| Glandular kallikrein-7, submandibular/renal precursor       | KLK7   | P36373 | 2 (4)  | Protein degradation pathway                        |     |        |
| Glial fibrillary acidic protein, astrocyte                  | GFAP   | P47819 | 3 (77) | Cytoskeletal proteins and linkers/molecular motors |     |        |
| Glutamate [NMDA] receptor subunit epsilon 4 precursor       | GRIN2D | Q62645 | 1 (1)  | Membrane receptors                                 | III |        |
| Glyceraldehyde-3-phosphate dehydrogenase                    | GAPDH  | P04797 | 1 (1)  | Metabolism proteins                                |     |        |
| Glycerol-3-phosphate dehydrogenase, mitochondrial precursor | GPD2   | P35571 | 2 (5)  | Metabolism proteins                                |     |        |

|                                                              |          |        |         |                                                    |     |        |
|--------------------------------------------------------------|----------|--------|---------|----------------------------------------------------|-----|--------|
| G-protein coupled receptor 64 precursor                      | GPR64    | Q8CJ11 | 1 (1)   | Membrane receptors                                 | III | RT-PCR |
| Hermansky-Pudlak syndrome 6 protein homolog                  | HPS6     | Q7M733 | 2 (2)   | Miscellaneous proteins                             |     |        |
| Hexokinase-1                                                 | HK1      | P05708 | 2 (2)   | Metabolism proteins                                |     |        |
| Histone H2B                                                  |          | Q00715 | 2 (2)   | Nuclear proteins                                   |     |        |
| Histone H4                                                   | HIST1H4B | P62804 | 3 (12)  | Nuclear proteins                                   |     |        |
| Hydroxymethylglutaryl-CoA synthase, mitochondrial precursor  | HMGCS2   | P22791 | 1 (1)   | Metabolism proteins                                |     |        |
| Keratin, type I cytoskeletal 19                              | KRT19    | Q63279 | 15 (81) | Cytoskeletal proteins and linkers/molecular motors |     |        |
| Keratin, type II cytoskeletal 8                              | KRT8     | Q10758 | 2 (9)   | Cytoskeletal proteins and linkers/molecular motors |     |        |
| Lamin-A                                                      | LMNA     | P48679 | 3 (3)   | Nuclear proteins                                   |     |        |
| Lipoprotein lipase precursor                                 | LPL      | Q06000 | 1 (1)   | Metabolism proteins                                | GPI | RT-PCR |
| Long-chain fatty acid transport protein 1                    | SLC27A1  | P97849 | 1 (1)   | Transporters and channels (related)                |     |        |
| Low-density lipoprotein receptor-related protein 4 precursor | LRP4     | Q9QYP1 | 1 (1)   | Membrane receptors                                 | I   | RT-PCR |
| Mitogen-activated protein kinase 12                          | MAPK12   | Q63538 | 1 (1)   | Protein kinases, serine/threonine                  |     | RT-PCR |
| Moesin                                                       | MSN      | O35763 | 2 (2)   | Cytoskeletal proteins and linkers/molecular motors |     |        |
| Myosin heavy chain, cardiac muscle beta isoform              | MYH7     | P02564 | 1 (1)   | Cytoskeletal proteins and linkers/molecular motors |     |        |
| Myosin Ib                                                    | MYO1A    | Q05096 | 1 (1)   | Cytoskeletal proteins and linkers/molecular motors |     |        |
| Myosin-5A                                                    | MYO5A    | Q9QYF3 | 3 (10)  | Cytoskeletal proteins and linkers/molecular motors |     |        |

|                                                                                  |         |        |        |                                                    |     |        |
|----------------------------------------------------------------------------------|---------|--------|--------|----------------------------------------------------|-----|--------|
| Myosin-9                                                                         | MYH9    | Q62812 | 3 (5)  | Cytoskeletal proteins and linkers/molecular motors |     |        |
| Neurofilament triplet H protein                                                  | NEFH    | P16884 | 4 (14) | Cytoskeletal proteins and linkers/molecular motors |     |        |
| Nitric oxide synthase, inducible                                                 | NOS2    | Q06518 | 1 (24) | Signaling proteins                                 |     |        |
| Nitric-oxide synthase, brain                                                     | NOS1    | P29476 | 3 (10) | Signaling proteins                                 |     |        |
| Nucleolar transcription factor 1                                                 | UBTF    | P25977 | 1 (2)  | Transcription factors                              |     |        |
| Oligonucleotide/oligosaccharide-binding fold-containing protein 1                | OBFC1   | Q6AYD2 | 1 (3)  | Miscellaneous proteins                             |     |        |
| Palmitoyltransferase ZDHHC7                                                      | ZDHHC7  | Q923G5 | 1 (1)  | Biosynthetic proteins                              | III | RT-PCR |
| Pancreatic alpha-amylase precursor                                               |         | P00689 | 1 (2)  | Secreted proteins                                  |     |        |
| PDZ domain-containing RING finger protein 3                                      | PDZRN3  | P68907 | 3 (4)  | Miscellaneous proteins                             |     |        |
| Peroxiredoxin-1                                                                  | PRDX1   | Q63716 | 3 (5)  | Stress proteins                                    |     |        |
| Peroxiredoxin-2                                                                  | PRDX2   | P35704 | 2 (2)  | Stress proteins                                    |     |        |
| Phosphatidylinositol-4,5-bisphosphate 3-kinase catalytic subunit beta isoform    | PIK3CB  | Q9Z1L0 | 1 (1)  | Signaling proteins                                 |     | RT-PCR |
| Phosphatidylinositol-4-phosphate 3-kinase C2 domain-containing gamma polypeptide | PIK3C2G | O70173 | 1 (1)  | Signaling proteins                                 |     |        |
| Phosphorylase b kinase gamma catalytic chain, testis/liver isoform               | PHKG2   | P31325 | 1 (1)  | Protein kinases, serine/threonine                  |     |        |
| Potassium channel subfamily K member 13, THIK-1                                  | KCNK13  | Q9ERS0 | 1 (1)  | Transporters and channels                          | III | RT-PCR |
| Potassium voltage-gated channel subfamily D member 3, Kv4.3                      | KCND3   | Q62897 | 1 (7)  | Transporters and channels                          | III |        |
| Potassium/sodium hyperpolarization-activated cyclic nucleotide-gated channel 1   | HCN1    | Q9JKB0 | 1 (3)  | Transporters and channels                          | III |        |
| Potassium-transporting ATPase alpha chain 1                                      | ATP4A   | P09626 | 1 (14) | Ion pumps                                          | III | IF     |
| Propionyl-CoA carboxylase alpha chain, mitochondrial precursor                   | PCCA    | P14882 | 6 (11) | Metabolism proteins                                |     |        |
| Propionyl-CoA carboxylase beta chain, mitochondrial precursor                    | PCCB    | P07633 | 5 (8)  | Metabolism proteins                                |     |        |
| Prostatic acid phosphatase precursor                                             | ACPP    | P20646 | 1 (2)  | Miscellaneous proteins                             |     |        |

|                                                                 |         |        |       |                                                    |     |        |
|-----------------------------------------------------------------|---------|--------|-------|----------------------------------------------------|-----|--------|
| Prostatic spermine-binding protein precursor                    | SBP     | P08723 | 1 (5) | Secreted proteins                                  |     |        |
| Protein piccolo                                                 | PCLO    | Q9JKS6 | 2 (8) | Cytoskeletal proteins and linkers/molecular motors |     |        |
| Protein-arginine deiminase type-1                               | PADI1   | O88806 | 1 (7) | Protein degradation pathway                        |     |        |
| Rab GTPase-binding effector protein 1                           | RABEP1  | O35550 | 1 (2) | Small GTP binding proteins and related proteins    |     | RT-PCR |
| Ras-related protein Rab-31                                      | RAB31   | Q6GQP4 | 1 (4) | Small GTP binding proteins and related proteins    |     | RT-PCR |
| Ribosome recycling factor, mitochondrial precursor              | MRRF    | Q5RKI9 | 1 (1) | Biosynthetic proteins                              |     |        |
| RNA-binding protein 10                                          | RBM10   | P70501 | 1 (1) | Nuclear proteins                                   |     |        |
| Septin-9                                                        | SEPT9   | Q9QZR6 | 1 (4) | Cytoskeletal proteins and linkers/molecular motors |     | RT-PCR |
| Serine protease inhibitor Kazal-type 2 precursor                | SPINK2  | Q6IE49 | 1 (4) | Secreted proteins                                  |     |        |
| Serine/threonine-protein kinase Nek6                            | NEK6    | P59895 | 1 (1) | Protein kinases, serine/threonine                  |     |        |
| Serine/threonine-protein kinase receptor R3 precursor           | ACVRL1  | P80203 | 2 (5) | Membrane receptors                                 | I   | IF     |
| Serum albumin precursor                                         | ALB     | P02770 | 2 (3) | Secreted proteins                                  |     |        |
| Signal-induced proliferation-associated 1-like protein 1, SPA-1 | SIPA1L1 | O35412 | 2 (2) | Small GTP binding proteins and related proteins    |     |        |
| Sodium- and chloride-dependent taurine transporter              | SLC6A6  | P31643 | 1 (3) | Transporters and channels                          | III | IF     |
| Sodium channel protein type 5 alpha subunit                     | SCN5A   | P15389 | 1 (5) | Transporters and channels                          | III |        |
| Sodium/hydrogen exchanger 2                                     | SLC9A2  | P48763 | 1 (1) | Transporters and channels                          | III | IF     |
| Somatotropin precursor                                          | GH1     | P01244 | 1 (1) | Secreted proteins                                  |     |        |

|                                                           |          |        |             |                                                    |     |        |
|-----------------------------------------------------------|----------|--------|-------------|----------------------------------------------------|-----|--------|
| Spectrin alpha chain, brain                               | SPTAN1   | P16086 | 81<br>(157) | Cytoskeletal proteins and linkers/molecular motors |     |        |
| Sphingosine 1-phosphate receptor Edg-8                    | EDG8     | Q9JKM5 | 1 (3)       | Membrane receptors                                 | III |        |
| Synaptosomal-associated protein 29                        | SNAP29   | Q9Z2P6 | 1 (1)       | Membrane trafficking proteins                      |     | RT-PCR |
| Synaptotagmin-like protein 4                              | SYTL4    | Q8VHQ7 | 3 (9)       | Membrane trafficking proteins                      |     |        |
| Syntaxin-8                                                | STX8     | Q9Z2Q7 | 2 (2)       | Membrane trafficking proteins                      | II  |        |
| Terminal deoxynucleotidyltransferase-interacting factor 1 | DNTTIP1  | Q91Y53 | 1 (2)       | Nuclear proteins                                   |     |        |
| Thioredoxin reductase 2, mitochondrial precursor          | TXNRD2   | Q9Z0J5 | 1 (1)       | Stress proteins                                    |     |        |
| Timeless homolog                                          | TIMELESS | Q9Z2Y1 | 2 (2)       | Nuclear proteins                                   |     |        |
| Transcription initiation factor IIF beta subunit          | GTF2F2   | Q01750 | 1 (1)       | Nuclear proteins                                   |     |        |
| Transforming growth factor beta-3 precursor               | TGFB3    | Q07258 | 1 (2)       | Secreted proteins                                  |     |        |
| Transmembrane protease, serine 9                          | TMPRSS9  | P69526 | 2 (6)       | Metabolism proteins                                | II  |        |
| Triosephosphate isomerase                                 | TPI1     | P48500 | 4 (6)       | Metabolism proteins                                |     |        |
| Tyrosine-protein kinase receptor TYRO3 precursor          | TYRO3    | P55146 | 1 (1)       | Membrane receptors                                 | I   | RT-PCR |
| Vitamin K-dependent gamma-carboxylase                     | GGCX     | O88496 | 1 (1)       | Biosynthetic proteins                              | III | RT-PCR |
| Wiskott-Aldrich syndrome protein-interacting protein      | WASPIP   | Q6IN36 | 1 (1)       | Cytoskeletal proteins and linkers/molecular motors |     | RT-PCR |
| Xanthine dehydrogenase/oxidase                            | XDH      | P22985 | 1 (7)       | Metabolism proteins                                |     |        |

a, Number of peptides identified with their total hit number in the parenthesis; b, Collecting duct database (CDDB) family group names; c, Membrane protein types: I, one membrane spanning helix with an extracellular N<sup>7</sup>-terminus; II, one membrane spanning helix with an extracellular C<sup>7</sup>-terminus; III, multiple membrane spanning helices; GPI, glycosylphosphatidylinositol-linked; d, Protein identifications confirmed by Immunofluorescence staining (IF) or RT-PCR.

Table S-3. RT-PCR primer sequences used to examine mRNA expression of single-peptide identifications in the inner medullary collecting ducts (IMCDs).

| Protein name                                                                   | Gene name | 5' primer <sup>a</sup>          | Exon <sup>b</sup> | 3' primer <sup>a</sup>       | Exon <sup>b</sup> |
|--------------------------------------------------------------------------------|-----------|---------------------------------|-------------------|------------------------------|-------------------|
| Angiotensin-converting enzyme                                                  | ACE       | ATGCCATGAAGTTGGGCT<br>AC        | 24                | AGTTGACGCGACTGGACT<br>CT     | 25                |
| Adenomatous polyposis coli protein                                             | APC       | ATGGCCTTGACAAACCTG<br>AC        | 11                | TCCAAAGCACATTCCATC<br>AA     | 13                |
| Aquaporin-2                                                                    | AQP2      | GACTGTGCTTAGTGCATC<br>TCATTTTAT | 4                 | AGGATCATGCAAACCTCTG<br>TTCGT | 4                 |
| Carbonic anhydrase 4 precursor                                                 | CA4       | ATCTGCCCACCCAGTACA<br>AG        | 4                 | AGCCCTCGTTTACCTCGT<br>TT     | 6                 |
| Calcyclin                                                                      | S100A6    | AAGGAGGGTGACAAGCA<br>CAC        | 2                 | AGATCATCCATCAGCCTT<br>GC     | 3                 |
| CD166 antigen precursor                                                        | ALCAM     | CTTGCACAGCAGAAAAC<br>CAA        | 12                | GAGGAGGAGACCAACCA<br>CAA     | 14                |
| CD40 ligand                                                                    | CD40LG    | TGAGGCCAACAGTAATG<br>CAG        | 4                 | ATTCGCTGCCCTGAGTAA<br>GA     | 5                 |
| CD59 glycoprotein precursor                                                    | CD59      | CTCGGAGGGGATTCATCT<br>TA        | 1                 | CCGGATACAGCAACAAG<br>ACA     | 2                 |
| Chloride intracellular channel protein 4                                       | CLIC4     | GCGACGAGATGACATTA<br>GCA        | 5                 | CTCTTGGCGACGTCACTG<br>TA     | 6                 |
| ERC protein 2                                                                  | ERC2      | TTGCAGACCGACTGAAA<br>CAG        | 10                | TTCTCCAGCTGTTGGTTG<br>TG     | 12                |
| Frizzled 1 precursor                                                           | FZD1      | CATCACATCAGGCTTCTG<br>GA        | 1                 | AGTGACTAGGCTTGGCA<br>GGA     | 1                 |
| Glutamate [NMDA] receptor subunit epsilon 4                                    | GRIN2D    | TCTTCGCGGTCATCTTTC<br>TT        | 8                 | CCACTCTCGGCTGGTTGT<br>AT     | 9                 |
| G-protein coupled receptor 64 precursor                                        | GPR64     | TTTTGCTGGATCAACAGC<br>AG        | 15                | AAGGCAAAGCCCCAAGT<br>AAT     | 17                |
| Potassium/sodium hyperpolarization-activated cyclic nucleotide-gated channel 1 | HCN1      | CAGCATGTCTGACCTCTG<br>GA        | 4                 | TATCTTCTGGCGCATGTC<br>AG     | 5                 |

|                                                                                  |         |                         |       |                       |    |
|----------------------------------------------------------------------------------|---------|-------------------------|-------|-----------------------|----|
| Potassium voltage-gated channel subfamily D member 3, Kv4.3                      | KCND3   | GGCTACACCCTGAAGAGCTG    | 1     | GCCAAATATCTTCCCAGCAA  | 2  |
| Lipoprotein lipase                                                               | LPL     | AACATTGGAGAAGCCATTCG    | 5     | CAGAGCCCTTTCTCAAATGC  | 6  |
| Low-density lipoprotein receptor-related protein 4                               | LRP4    | TGTCAGCTACGCCGTTGGTGGAC | 36    | CACTTCCTGAGTGGAAGTTCG | 37 |
| Mitogen-activated protein kinase 12                                              | MAPK12  | GCTGTGAACGAGGACTGTGA    | 6     | AGCCAACAGACCAAATGTCC  | 8  |
| Monocarboxylate transporter 2, MCT2                                              | SLC16A7 | TGTCTTATGGACCAGGTTGG    | 3     | CACGACTATCCCCTGCGCTA  | 4  |
| Palmitoyltransferase ZDHHC7                                                      | ZDHHC7  | GTGGGTGAACAACACTGTGTGG  | 5     | TGACTGCGGTGAAAGTGAAG  | 7  |
| Phosphatidylinositol-4-phosphate 3-kinase C2 domain-containing gamma polypeptide | PIK3C2G | GCAGAGTCTGGAGTGCTTCC    | 29    | CTGCTCGAAGGACTTTTTGG  | 30 |
| Phosphatidylinositol-4,5-bisphosphate 3-kinase catalytic subunit beta isoform    | PIK3CB  | TGAGGTTGTGAGCACCTCTG    | 18    | TCACCAATGCCAAGGACATA  | 19 |
| cAMP-dependent protein kinase, beta-catalytic subunit                            | PRKACB  | ACCCCATGCTCGTTTCTATG    | 6     | CTTGACTCTCTTGGCGAACCC | 7  |
| Podocalyxin precursor                                                            | PODXL   | GGCTGTGTTTGAAGCTGCTGA   | 6     | CTGTCTGCAGCTCCTCTGTG  | 8  |
| Ras-related protein Rab-31                                                       | RAB31   | TGGGTTAAGGAGCTGAAGGA    | 5     | GCCACTGTTTCCGTTTTTCAT | 7  |
| Rabaptin-5, Rab GTPase-binding effector protein 1                                | RABEP1  | ACTGCTGCTAAGGCCACTGT    | 16-17 | TGTCATGTCTCAGGGAGCTG  | 18 |

|                                                          |        |                          |    |                           |       |
|----------------------------------------------------------|--------|--------------------------|----|---------------------------|-------|
| ATP-sensitive inward rectifier potassium channel 1       | KCNJ1  | TGTGGATGCACAGTCAA<br>GGT | 2  | GTCAGGCGGGTAGAACT<br>CTG  | 5     |
| Sphingosine 1-phosphate receptor Edg-8                   | EDG8   | ACACCTTCACCAACCGAG<br>AC | 1  | GGGGACACGAGTGTCT<br>GAT   | 1     |
| Sodium channel protein type 5 alpha subunit              | SCN5A  | AACCAGACAGAAGGGGA<br>CCT | 24 | GCTGCTCCTCATACCCTC<br>TG  | 25-26 |
| Septin-9                                                 | SEPT9  | AAGAAACGCATCCCTGA<br>CAC | 6  | ATACCGTTGGACAGCAG<br>GTC  | 7     |
| Synaptosomal-associated protein 29                       | SNAP29 | ATGTGGAAGACGAGGAC<br>ACC | 1  | GTCCACCATCTTCTCCGT<br>GT  | 2     |
| Potassium channel subfamily K member 13, THIK-1          | KCNK13 | GGCTCATCCTGCTTTACC<br>TG | 1  | CACTGTGCCACGAAGTA<br>GA   | 1     |
| Tyrosine-protein kinase receptor TYRO3                   | TYRO3  | CATCCTGCTTCGGAAGAG<br>AC | 10 | TCCTCCAGCTTCTCCTTC<br>AA  | 12    |
| Vesicle-associated membrane protein-associated protein A | VAPA   | TTGCTCCACCAAACATTT<br>CA | 3  | AGTCGCTTGC ACTCTTCC<br>AT | 5     |
| Vitamin K-dependent gamma-carboxylase                    | GGCX   | AACCTTTCTGAGACGGCA<br>GA | 14 | GGTTCAAATGGTCGCAA<br>GTT  | 15    |
| Wiskott-Aldrich syndrome protein-interacting protein     | WASPIP | TACACCTCCCTTGCTTC<br>AC  | 5  | CTGGGACTGTCCATTCCA<br>CT  | 6     |

a, Primers were selected using an online software Primer3 ([http://frodo.wi.mit.edu/cgi-bin/primer3/primer3\\_www.cgi](http://frodo.wi.mit.edu/cgi-bin/primer3/primer3_www.cgi)) from the Whitehead Institute for Biomedical Research. Each pair frames at least one intron to avoid amplification of genomic DNA, except those for FZD1, EDG8, and KCNK13 that have one single exon. b, Numbers indicate primer locations on the exons. Information of the transcripts was obtained from Ensembl *Rattus norvegicus* database ([http://www.ensembl.org/Rattus\\_norvegicus/index.html](http://www.ensembl.org/Rattus_norvegicus/index.html)).



Table S-4. Proteins identified from the fixed incubation-biotinylated inner medullary collecting ducts (IMCDs).

| Protein name                        | Gene name | Accession | Ion (n) <sup>a</sup> | CDDB family <sup>b</sup>                        | Type <sup>c</sup> | Confirmed <sup>d</sup> |
|-------------------------------------|-----------|-----------|----------------------|-------------------------------------------------|-------------------|------------------------|
| 14-3-3 protein eta                  | YWHAH     | P68511    | 2 (9)                | Signaling proteins                              |                   |                        |
| 40S ribosomal protein S15a          | RPS15A    | P62246    | 1 (1)                | Biosynthetic proteins                           |                   |                        |
| 60S acidic ribosomal protein P2     | RPLP2     | P02401    | 2 (3)                | Biosynthetic proteins                           |                   |                        |
| 60S ribosomal protein L13           | RPL13     | P41123    | 1 (1)                | Biosynthetic proteins                           |                   |                        |
| 60S ribosomal protein L14           | RPL14     | Q63507    | 2 (6)                | Biosynthetic proteins                           |                   |                        |
| 60S ribosomal protein L15           | RPL15     | P61314    | 1 (1)                | Biosynthetic proteins                           |                   |                        |
| 60S ribosomal protein L23           | RPL23     | P62832    | 1 (1)                | Biosynthetic proteins                           |                   |                        |
| 60S ribosomal protein L34           | RPL34     | P11250    | 1 (1)                | Biosynthetic proteins                           |                   |                        |
| 60S ribosomal protein L8            | RPL8      | P62919    | 1 (7)                | Biosynthetic proteins                           |                   |                        |
| 6-phosphofructokinase, liver        | PFKL      | P30835    | 1 (2)                | Metabolism Proteins                             |                   |                        |
| 6-phosphofructokinase, muscle       | PFKM      | P47858    | 1 (2)                | Metabolism Proteins                             |                   |                        |
| Acetyl-CoA carboxylase 1            | ACACA     | P11497    | 1 (1)                | Biosynthetic proteins                           |                   |                        |
| ADAM 10 precursor                   | ADAM10    | Q10743    | 1 (1)                | Signaling proteins                              | I                 |                        |
| ADAM 17 precursor                   | ADAM17    | Q9Z1K9    | 1 (1)                | Signaling proteins                              | I                 |                        |
| ADP-ribosylation factor 2           | ARF2      | P84082    | 3 (4)                | Small GTP binding proteins and related proteins |                   |                        |
| ADP-ribosylation factor 4           | ARF4      | P61751    | 1 (1)                | Small GTP binding proteins and related proteins |                   |                        |
| ADP-ribosylation factor 5           | ARF5      | P84083    | 3 (13)               | Small GTP binding proteins and related proteins |                   |                        |
| Agrin precursor                     | AGRN      | P25304    | 4 (20)               | Adhesion proteins and collagens                 | II                |                        |
| Amine oxidase [flavin-containing] A | MAOA      | P21396    | 1 (1)                | Protein degradation pathways                    | II                |                        |

|                                                                                         |         |        |        |                                                   |     |        |
|-----------------------------------------------------------------------------------------|---------|--------|--------|---------------------------------------------------|-----|--------|
| ATP synthase delta chain, mitochondrial precursor                                       | ATP5D   | P35434 | 1 (2)  | Metabolism<br>Proteins                            |     |        |
| ATP synthase O subunit, mitochondrial precursor                                         | ATP5O   | Q06647 | 1 (2)  | Metabolism<br>Proteins                            |     |        |
| ATP-sensitive inward rectifier potassium channel 1                                      | KCNJ1   | P35560 | 1 (1)  | Transporters and<br>Channels                      | III | RT-PCR |
| Beta-2-microglobulin precursor                                                          | B2M     | P07151 | 1 (1)  | Miscellaneous<br>proteins                         |     |        |
| Beta-glucuronidase precursor                                                            | GUSB    | P06760 | 4 (8)  | Protein<br>degradation<br>pathways                |     |        |
| Carbonic anhydrase 2                                                                    | CA2     | P27139 | 2 (7)  | Transporters and<br>channels (related<br>protein) |     |        |
| Core histone macro-H2A.1                                                                | H2AFY   | Q02874 | 3 (4)  | Nuclear proteins                                  |     |        |
| Corticosteroid 11-beta-dehydrogenase isozyme 1                                          | HSD11B1 | P16232 | 1 (2)  | Steroid<br>metabolizing<br>enzymes                |     |        |
| Cytochrome c oxidase polypeptide Va, mitochondrial precursor                            | COX5A   | P11240 | 1 (2)  | Metabolism<br>Proteins                            |     |        |
| Cytochrome c oxidase subunit 4 isoform 1, mitochondrial precursor                       | COX4I1  | P10888 | 3 (4)  | Metabolism<br>Proteins                            | II  |        |
| Dihydropyrimidinase-related protein 2                                                   | DPYSL2  | P47942 | 1 (1)  | Miscellaneous<br>proteins                         |     |        |
| Dolichyl-diphosphooligosaccharide--protein glycosyltransferase 63 kDa subunit precursor | RPN2    | P25235 | 5 (8)  | Biosynthetic<br>proteins                          | III |        |
| Dolichyl-diphosphooligosaccharide--protein glycosyltransferase 67 kDa subunit precursor | RPN1    | P07153 | 5 (8)  | Biosynthetic<br>proteins                          | III |        |
| Ectonucleotide pyrophosphatase/phosphodiesterase 1                                      | ENPP1   | Q924C3 | 1 (1)  | Signaling proteins                                | II  |        |
| Endoplasmic reticulum protein ERp29 precursor                                           | ERP29   | P52555 | 2 (5)  | Biosynthetic<br>proteins                          |     |        |
| Epithelial-cadherin precursor                                                           | CDH1    | Q9R0T4 | 8 (16) | Adhesion proteins<br>and collagens                | I   |        |
| Frizzled 1 precursor                                                                    | FZD1    | Q08463 | 1 (1)  | Membrane<br>receptors                             | III | RT-PCR |
| Galectin-3                                                                              | LGALS3  | P08699 | 3 (7)  | Miscellaneous<br>proteins                         |     |        |
| Glutathione S-transferase theta-2                                                       | GSTT2   | P30713 | 1 (2)  | Stress proteins                                   |     |        |
| Golgi apparatus protein 1 precursor                                                     | GLG1    | Q62638 | 2 (4)  | Adhesion proteins<br>and collagens                | I   |        |

|                                                          |        |        |         |                                                             |     |
|----------------------------------------------------------|--------|--------|---------|-------------------------------------------------------------|-----|
| GTP:AMP phosphotransferase mitochondrial                 | AK3    | P29411 | 1 (1)   | Metabolism<br>Proteins                                      |     |
| GTP-binding protein ARD-1                                | TRIM23 | P36407 | 1 (1)   | Small GTP<br>binding proteins<br>and related<br>proteins    |     |
| Heat-shock protein beta-3                                | HSPB3  | Q9QZ58 | 1 (1)   | Chaperone                                                   |     |
| Hemoglobin beta-1 subunit                                | HBB    | P02091 | 2 (4)   | Miscellaneous<br>proteins                                   |     |
| Heparin-binding growth factor 2 precursor                | FGF2   | P13109 | 1 (2)   | Miscellaneous<br>proteins                                   |     |
| Histone H2A 1                                            |        | P02262 | 6 (18)  | Nuclear proteins                                            |     |
| Histone H2B                                              |        | Q00715 | 2 (4)   | Nuclear proteins                                            |     |
| Histone H3                                               | H3F3B  | P84245 | 3 (4)   | Nuclear proteins                                            |     |
| Hyaluronan and proteoglycan link protein 2 precursor     | HAPLN2 | Q9ESM2 | 1 (5)   | Secreted proteins                                           |     |
| Insulin-like growth factor 1 receptor precursor          | IGF1R  | P24062 | 3 (4)   | Membrane<br>receptors                                       | I   |
| Integrin beta-1 precursor                                | ITGB1  | P49134 | 24 (54) | Adhesion proteins<br>and collagens                          | I   |
| Lactadherin precursor                                    | MFGE8  | P70490 | 3 (6)   | Miscellaneous<br>proteins                                   |     |
| Major vault protein                                      | MVP    | Q62667 | 4 (4)   | Miscellaneous<br>proteins                                   |     |
| Myosin regulatory light chain 2-B, smooth muscle isoform | RLC-B  | P18666 | 2 (2)   | Cytoskeletal<br>Proteins and<br>Linkers/Molecular<br>Motors |     |
| Neural cell adhesion molecule L1 precursor               | L1CAM  | Q05695 | 2 (2)   | Adhesion proteins<br>and collagens                          | I   |
| Neuropilin-1 precursor                                   | NRP1   | Q9QWJ9 | 2 (2)   | Membrane<br>receptors                                       | I   |
| Nucleobindin-1 precursor                                 | NUCB1  | Q63083 | 1 (1)   | Miscellaneous<br>proteins                                   |     |
| Peptidyl-prolyl cis-trans isomerase B precursor          | PPIB   | P24368 | 2 (3)   | Biosynthetic<br>proteins                                    |     |
| Peroxiredoxin-1                                          | PRDX1  | Q63716 | 3 (3)   | Stress proteins                                             |     |
| Peroxiredoxin-5, mitochondrial precursor                 | PRDX5  | Q9R063 | 1 (2)   | Stress proteins                                             |     |
| Phosphatidylethanolamine-binding protein                 | PBP    | P31044 | 1 (1)   | Signaling proteins                                          |     |
| Poly [ADP-ribose] polymerase 1                           | PARP1  | P27008 | 1 (1)   | Stress proteins                                             |     |
| Probable G-protein coupled receptor 116 precursor        | GPR116 | Q9WVT0 | 2 (4)   | Membrane<br>receptors                                       | III |

|                                                                  |          |        |         |                                                 |   |
|------------------------------------------------------------------|----------|--------|---------|-------------------------------------------------|---|
| Programmed cell death 6-interacting protein                      | PDCD6IP  | Q9QZA2 | 1 (1)   | Apoptosis proteins                              |   |
| Prolyl 4-hydroxylase alpha-1 subunit precursor                   | P4HA1    | P54001 | 1 (2)   | Biosynthetic proteins                           |   |
| Prostaglandin F2 receptor negative regulator precursor           | PTGFRN   | Q62786 | 1 (2)   | Miscellaneous proteins                          | I |
| Proto-oncogene C-crk                                             | CRK      | Q63768 | 1 (2)   | Signaling proteins                              |   |
| Pyruvate carboxylase, mitochondrial precursor                    | PC       | P52873 | 13 (17) | Metabolism Proteins                             |   |
| Ras-related protein Rab-1B                                       | RAB1B    | P10536 | 1 (1)   | Small GTP binding proteins and related proteins |   |
| Replication protein A 32 kDa subunit                             | RPA2     | Q63528 | 1 (1)   | Nuclear proteins                                |   |
| Serine/threonine-protein phosphatase PP1-gamma catalytic subunit | PPP1CC   | P63088 | 1 (1)   | Protein phosphatases                            |   |
| Single-stranded DNA-binding protein, mitochondrial precursor     | SSBP1    | P28042 | 1 (2)   | Stress proteins                                 |   |
| SPARC precursor                                                  | SPARC    | P16975 | 1 (1)   | Secreted proteins                               |   |
| Succinate dehydrogenase [ubiquinone] iron-sulfur protein         | SDHB     | P21913 | 1 (1)   | Metabolism Proteins                             |   |
| Superoxide dismutase [Cu-Zn]                                     | SOD1     | P07632 | 1 (2)   | Stress proteins                                 |   |
| Superoxide dismutase [Mn], mitochondrial precursor               | SOD2     | P07895 | 1 (2)   | Stress proteins                                 |   |
| T-complex protein 1 subunit delta                                | CCT4     | Q7TPB1 | 2 (3)   | Chaperone                                       |   |
| Thioredoxin                                                      | TXN      | P11232 | 1 (2)   | Stress proteins                                 |   |
| Trimethyllysine dioxygenase, mitochondrial precursor             | TMLHE    | Q91ZW6 | 1 (1)   | Biosynthetic proteins                           |   |
| 14-3-3 protein zeta/delta                                        | YWHAZ    | P63102 | 1 (1)   | Signaling proteins                              |   |
| 150 kDa oxygen-regulated protein precursor                       | HYOU1    | Q63617 | 5 (5)   | Chaperones                                      |   |
| 3,2-trans-enoyl-CoA isomerase, mitochondrial precursor           | DCI      | P23965 | 3 (4)   | Biosynthetic proteins                           |   |
| 3-hydroxyacyl-CoA dehydrogenase type-2                           | HADH2    | O70351 | 9 (11)  | Metabolism proteins                             |   |
| 3-hydroxyisobutyrate dehydrogenase, mitochondrial precursor      | HIBADH   | P29266 | 1 (1)   | Miscellaneous proteins                          |   |
| 3-ketoacyl-CoA thiolase, mitochondrial                           | ACAA2    | P13437 | 5 (5)   | Metabolism proteins                             |   |
| 47 kDa heat shock protein precursor                              | SERPINH1 | P29457 | 2 (2)   | Chaperones                                      |   |

|                                                                                |         |        |          |                                                    |     |
|--------------------------------------------------------------------------------|---------|--------|----------|----------------------------------------------------|-----|
| 60 kDa heat shock protein, mitochondrial precursor                             | HSPD1   | P63039 | 17 (19)  | Chaperones                                         |     |
| 60S acidic ribosomal protein P0                                                | RPLP0   | P19945 | 6 (7)    | Biosynthetic proteins                              |     |
| 60S ribosomal protein L11                                                      | RPL11   | P62914 | 1 (1)    | Biosynthetic proteins                              |     |
| 60S ribosomal protein L18                                                      | RPL18   | P12001 | 1 (1)    | Biosynthetic proteins                              |     |
| 60S ribosomal protein L6                                                       | RPL6    | P21533 | 1 (1)    | Biosynthetic proteins                              |     |
| 60S ribosomal protein L7                                                       | RPL7    | P05426 | 1 (1)    | Biosynthetic proteins                              |     |
| 78 kDa glucose-regulated protein precursor                                     | HSPA5   | P06761 | 14 (18)  | Biosynthetic proteins                              |     |
| Acetyl-CoA acetyltransferase, mitochondrial precursor                          | ACAT1   | P17764 | 9 (23)   | Metabolism proteins                                |     |
| Actin, alpha cardiac                                                           | ACTC    | P68035 | 19 (265) | Cytoskeletal proteins and linkers/molecular motors |     |
| Actin, cytoplasmic 2                                                           | ACTG1   | P63259 | 13 (114) | Cytoskeletal proteins and linkers/molecular motors |     |
| Acyl-CoA dehydrogenase, long-chain specific, mitochondrial precursor           | ACADL   | P15650 | 3 (6)    | Metabolism proteins                                |     |
| Acyl-CoA dehydrogenase, short/branched chain specific, mitochondrial precursor | ACADSB  | P70584 | 1 (1)    | Metabolism proteins                                |     |
| Acyl-CoA dehydrogenase, very-long-chain specific, mitochondrial precursor      | ACADVL  | P45953 | 4 (10)   | Metabolism proteins                                |     |
| ADP/ATP translocase 1                                                          | SLC25A4 | Q05962 | 2 (2)    | Transporters and channels                          | III |
| ADP/ATP translocase 2                                                          | SLC25A5 | Q09073 | 4 (16)   | Transporters and channels                          | III |
| Aldose reductase                                                               | AKR1B1  | P07943 | 8 (27)   | Stress proteins                                    |     |
| Alpha crystallin B chain                                                       | CRYAB   | P23928 | 3 (5)    | Chaperones                                         |     |
| Alpha-actinin-1                                                                | ACTN1   | Q9Z1P2 | 7 (10)   | Cytoskeletal proteins and linkers/molecular motors |     |
| Alpha-actinin-4                                                                | ACTN4   | Q9QXQ0 | 26 (56)  | Cytoskeletal proteins and linkers/molecular motors |     |

|                                                     |        |        |         |                                 |   |        |
|-----------------------------------------------------|--------|--------|---------|---------------------------------|---|--------|
| Alpha-enolase                                       | ENO1   | P04764 | 8 (9)   | Metabolism proteins             |   |        |
| Annexin A1                                          | ANXA1  | P07150 | 8 (16)  | Membrane trafficking proteins   |   |        |
| Annexin A2                                          | ANXA2  | Q07936 | 21 (55) | Membrane trafficking proteins   |   |        |
| Annexin A5                                          | ANXA5  | P14668 | 4 (6)   | Membrane trafficking proteins   |   |        |
| Annexin A6                                          | ANXA6  | P48037 | 4 (4)   | Membrane trafficking proteins   |   |        |
| AP-2 complex subunit alpha-2                        | AP2A2  | P18484 | 1 (1)   | Membrane trafficking proteins   |   |        |
| AP-2 complex subunit beta-1                         | AP2B1  | P62944 | 2 (4)   | Membrane trafficking proteins   |   |        |
| Arginase-2, mitochondrial precursor                 | ARG2   | O08701 | 2 (2)   | Biosynthetic proteins           |   |        |
| Aspartate aminotransferase, mitochondrial precursor | GOT2   | P00507 | 8 (10)  | Biosynthetic proteins           |   |        |
| ATP synthase alpha chain, mitochondrial precursor   | ATP5A1 | P15999 | 18 (74) | Metabolism proteins             |   |        |
| ATP synthase beta chain, mitochondrial precursor    | ATP5B  | P10719 | 23 (42) | Metabolism proteins             |   |        |
| ATP synthase gamma chain, mitochondrial             | ATP5C1 | P35435 | 3 (3)   | Metabolism proteins             |   |        |
| Beta-catenin                                        | CTNNB1 | Q9WU82 | 6 (7)   | Signaling proteins              |   |        |
| Calnexin precursor                                  | CANX   | P35565 | 13 (27) | Chaperones                      | I |        |
| Calpain small subunit 1                             | CAPNS1 | Q64537 | 2 (2)   | Protein degradation pathways    |   |        |
| Calreticulin precursor                              | CALR   | P18418 | 3 (4)   | Chaperones                      |   |        |
| Calumenin precursor                                 | CALU   | O35783 | 1 (1)   | Miscellaneous proteins          |   |        |
| Catalase                                            | CAT    | P04762 | 1 (1)   | Stress proteins                 |   |        |
| CD166 antigen precursor                             | ALCAM  | O35112 | 1 (2)   | Adhesion proteins and collagens | I | RT-PCR |
| Ceruloplasmin precursor                             | CP     | P13635 | 2 (2)   | Secreted proteins               |   |        |
| Clathrin heavy chain                                | CLTC   | P11442 | 10 (13) | Membrane trafficking proteins   |   |        |

|                                                                                                                             |          |        |         |                                                 |     |
|-----------------------------------------------------------------------------------------------------------------------------|----------|--------|---------|-------------------------------------------------|-----|
| Cytochrome c oxidase subunit 2                                                                                              | MTCO2    | P00406 | 1 (1)   | Metabolism proteins                             | III |
| Dihydrolipoyllysine-residue acetyltransferase component of pyruvate dehydrogenase complex                                   | DLAT     | P08461 | 2 (4)   | Metabolism proteins                             |     |
| Dihydrolipoyllysine-residue succinyltransferase component of 2- oxoglutarate dehydrogenase complex, mitochondrial precursor | DLST     | Q01205 | 1 (1)   | Metabolism proteins                             |     |
| Elongation factor 1-alpha 1                                                                                                 | EEF1A1   | P62630 | 4 (5)   | Biosynthetic proteins                           |     |
| Elongation factor 1-alpha 2                                                                                                 | EEF1A2   | P62632 | 4 (11)  | Biosynthetic proteins                           |     |
| Elongation factor 2                                                                                                         | EEF2     | P05197 | 3 (3)   | Biosynthetic proteins                           |     |
| Enoyl-CoA hydratase, mitochondrial precursor                                                                                | ECHS1    | P14604 | 3 (3)   | Biosynthetic proteins                           |     |
| Gamma-enolase                                                                                                               | ENO2     | P07323 | 2 (2)   | Metabolism proteins                             |     |
| Glutamate dehydrogenase 1, mitochondrial precursor                                                                          | GLUD1    | P10860 | 5 (5)   | Metabolism proteins                             |     |
| Glutaminase kidney isoform, mitochondrial precursor                                                                         | GLS      | P13264 | 2 (3)   | Metabolism proteins                             |     |
| Glutathione peroxidase 1                                                                                                    | GPX1     | P04041 | 1 (1)   | Stress proteins                                 |     |
| Glyceraldehyde-3-phosphate dehydrogenase                                                                                    | GAPDH    | P04797 | 7 (17)  | Metabolism proteins                             |     |
| Glycerol-3-phosphate dehydrogenase, mitochondrial precursor                                                                 | GPD2     | P35571 | 2 (4)   | Metabolism proteins                             |     |
| GTP-binding nuclear protein Ran                                                                                             | RAN      | P62828 | 1 (1)   | Small GTP binding proteins and related proteins |     |
| Guanine nucleotide-binding protein beta subunit 2-like 1                                                                    | GNB2L1   | P63245 | 1 (1)   | Heterotrimeric G proteins                       |     |
| Guanine nucleotide-binding protein G                                                                                        | GNAI2    | P04897 | 7 (8)   | Heterotrimeric G proteins                       |     |
| Heat shock 70 kDa protein 1A/1B                                                                                             | HSPA1A   | Q07439 | 12 (26) | Chaperones                                      |     |
| Heat shock cognate 71 kDa protein                                                                                           | HSPA8    | P63018 | 6 (10)  | Chaperones                                      |     |
| Heat shock protein HSP 90-beta                                                                                              | HSP90AB1 | P34058 | 10 (11) | Chaperones                                      |     |
| Heat shock-related 70 kDa protein 2                                                                                         | HSPA2    | P14659 | 4 (4)   | Chaperones                                      |     |
| Heat-shock protein beta-1                                                                                                   | HSPB1    | P42930 | 6 (10)  | Chaperones                                      |     |
| Hexokinase-1                                                                                                                | HK1      | P05708 | 2 (3)   | Metabolism proteins                             |     |

|                                                                                |          |        |          |                                                    |   |
|--------------------------------------------------------------------------------|----------|--------|----------|----------------------------------------------------|---|
| Histone H1.0                                                                   | H1F0     | P43278 | 1 (1)    | Nuclear proteins                                   |   |
| Histone H1.2                                                                   | HIST1H1C | P15865 | 1 (1)    | Nuclear proteins                                   |   |
| Histone H4 [Contains: Osteogenic growth peptide                                | HIST1H4B | P62804 | 1 (1)    | Nuclear proteins                                   |   |
| Integrin alpha-1 precursor                                                     | ITGA1    | P18614 | 2 (2)    | Adhesion proteins and collagens                    | I |
| Interferon-induced GTP-binding protein Mx2                                     | MX2      | P18589 | 1 (1)    | Membrane trafficking proteins                      |   |
| Isovaleryl-CoA dehydrogenase, mitochondrial precursor                          | IVD      | P12007 | 2 (4)    | Metabolism proteins                                |   |
| Keratin, I cytoskeletal 19                                                     | KRT19    | Q63279 | 5 (12)   | Cytoskeletal proteins and linkers/molecular motors |   |
| Keratin, II cytoskeletal 8                                                     | KRT8     | Q10758 | 9 (29)   | Cytoskeletal proteins and linkers/molecular motors |   |
| Lamin-A                                                                        | LMNA     | P48679 | 5 (7)    | Cytoskeletal proteins and linkers/molecular motors |   |
| Laminin beta-2 chain precursor                                                 | LAMB2    | P15800 | 2 (2)    | Adhesion proteins and collagens                    |   |
| L-lactate dehydrogenase A chain                                                | LDHA     | P04642 | 3 (3)    | Metabolism proteins                                |   |
| Malate dehydrogenase, mitochondrial precursor                                  | MDH2     | P04636 | 9 (32)   | Metabolism proteins                                |   |
| Methylmalonate-semialdehyde dehydrogenase [acylating], mitochondrial precursor | ALDH6A1  | Q02253 | 5 (7)    | Metabolism proteins                                |   |
| Moesin                                                                         | MSN      | O35763 | 3 (3)    | Cytoskeletal proteins and linkers/molecular motors |   |
| Myosin Id                                                                      | MYO1D    | Q63357 | 6 (9)    | Cytoskeletal proteins and linkers/molecular motors |   |
| Myosin light polypeptide 6                                                     | MYL6     | Q64119 | 1 (3)    | Cytoskeletal proteins and linkers/molecular motors |   |
| Myosin-10                                                                      | MYH10    | Q9JLT0 | 71 (141) | Cytoskeletal proteins and linkers/molecular motors |   |



|                                                                        |         |        |          |                                                    |     |        |
|------------------------------------------------------------------------|---------|--------|----------|----------------------------------------------------|-----|--------|
| Myosin-11                                                              | MYH11   | Q63862 | 7 (33)   | Cytoskeletal proteins and linkers/molecular motors |     |        |
| Myosin-9                                                               | MYH9    | Q62812 | 67 (137) | Cytoskeletal proteins and linkers/molecular motors |     |        |
| NADH-ubiquinone oxidoreductase 24 kDa subunit, mitochondrial precursor | NDUFV2  | P19234 | 1 (1)    | Metabolism proteins                                |     |        |
| Neurofilament triplet H protein                                        | NEFH    | P16884 | 1 (1)    | Cytoskeletal proteins and linkers/molecular motors |     |        |
| Peroxisomal multifunctional enzyme 2                                   | HSD17B4 | P97852 | 5 (6)    | Metabolism proteins                                |     |        |
| Phosphate carrier protein, mitochondrial precursor                     | SLC25A3 | P16036 | 2 (5)    | Transporters and channels                          | III |        |
| Plastin-3                                                              | PLS3    | Q63598 | 3 (4)    | Cytoskeletal proteins and linkers/molecular motors |     |        |
| Plectin 1                                                              | PLEC1   | P30427 | 9 (11)   | Cytoskeletal proteins and linkers/molecular motors |     |        |
| Podocalyxin precursor                                                  | PODXL   | Q9WTQ2 | 1 (1)    | Adhesion proteins and collagens                    | I   | RT-PCR |
| Profilin-1                                                             | PFN1    | P62963 | 1 (2)    | Cytoskeletal proteins and linkers/molecular motors |     |        |
| Programmed cell death protein 8, mitochondrial precursor               | PDCD8   | Q9JM53 | 6 (8)    | Apoptosis proteins                                 |     |        |
| Prohibitin                                                             | PHB     | P67779 | 5 (6)    | Miscellaneous proteins                             |     |        |
| Propionyl-CoA carboxylase beta chain, mitochondrial precursor          | PCCB    | P07633 | 4 (5)    | Metabolism proteins                                |     |        |
| Prostaglandin G/H synthase 1 precursor                                 | PTGS1   | Q63921 | 3 (5)    | Signaling proteins                                 |     |        |
| Protein disulfide-isomerase A3 precursor                               | PDIA3   | P11598 | 14 (24)  | Biosynthetic proteins                              |     |        |
| Protein disulfide-isomerase A4 precursor                               | PDIA4   | P38659 | 3 (3)    | Biosynthetic proteins                              |     |        |
| Protein disulfide-isomerase A6 precursor                               | PDIA6   | Q63081 | 4 (4)    | Biosynthetic proteins                              |     |        |

|                                                                                          |        |        |          |                                                    |     |
|------------------------------------------------------------------------------------------|--------|--------|----------|----------------------------------------------------|-----|
| Protein disulfide-isomerase precursor                                                    | P4HB   | P04785 | 6 (6)    | Biosynthetic proteins                              |     |
| Pyruvate dehydrogenase E1 component alpha subunit, somatic form, mitochondrial precursor | PDHA1  | P26284 | 2 (5)    | Metabolism proteins                                |     |
| Pyruvate dehydrogenase E1 component beta subunit, mitochondrial precursor                | PDHB   | P49432 | 4 (6)    | Metabolism proteins                                |     |
| Pyruvate kinase isozymes M1/M2                                                           | PKM2   | P11980 | 14 (28)  | Metabolism proteins                                |     |
| Ras-related protein Rab-14                                                               | RAB14  | P61107 | 2 (3)    | Small GTP binding proteins and related proteins    |     |
| Ras-related protein Rab-1A                                                               | RAB1A  | Q6NYB7 | 1 (1)    | Small GTP binding proteins and related proteins    |     |
| Serum albumin precursor                                                                  | ALB    | P02770 | 6 (7)    | Secreted proteins                                  |     |
| Short chain 3-hydroxyacyl-CoA dehydrogenase, mitochondrial precursor                     | HADHSC | Q9WVK7 | 2 (2)    | Metabolism proteins                                |     |
| Sodium/potassium-transporting ATPase alpha-1 chain precursor                             | ATP1A1 | P06685 | 26 (134) | Ion pumps                                          | III |
| Sodium/potassium-transporting ATPase alpha-3 chain                                       | ATP1A3 | P06687 | 15 (63)  | Ion pumps                                          | III |
| Sodium/potassium-transporting ATPase beta-1 chain                                        | ATP1B1 | P07340 | 6 (14)   | Ion pumps                                          | II  |
| Sodium/potassium-transporting ATPase beta-3 chain                                        | ATP1B3 | Q63377 | 1 (3)    | Ion pumps                                          | II  |
| Spectrin alpha chain, brain                                                              | SPTAN1 | P16086 | 70 (151) | Cytoskeletal proteins and linkers/molecular motors |     |
| Spectrin beta chain, brain 2                                                             | SPTBN2 | Q9QWN8 | 51 (94)  | Cytoskeletal proteins and linkers/molecular motors |     |
| Stress-70 protein, mitochondrial precursor                                               | HSPA9  | P48721 | 14 (16)  | Chaperones                                         |     |
| Succinate dehydrogenase [ubiquinone] flavoprotein subunit, mitochondrial precursor       | SDHA   | Q920L2 | 3 (4)    | Metabolism proteins                                |     |
| Transitional endoplasmic reticulum ATPase                                                | VCP    | P46462 | 3 (3)    | Membrane trafficking proteins                      |     |
| Transketolase                                                                            | TKT    | P50137 | 1 (1)    | Metabolism proteins                                |     |

|                                                                                  |          |        |         |                                                    |     |
|----------------------------------------------------------------------------------|----------|--------|---------|----------------------------------------------------|-----|
| Trifunctional enzyme alpha subunit, mitochondrial precursor                      | HADHA    | Q64428 | 13 (16) | Metabolism proteins                                |     |
| Trifunctional enzyme beta subunit, mitochondrial precursor                       | HADHB    | Q60587 | 2 (2)   | Metabolism proteins                                |     |
| Triosephosphate isomerase                                                        | TPI1     | P48500 | 5 (6)   | Biosynthetic proteins                              |     |
| Tubulin alpha-1 chain                                                            | TUBA1    | P68370 | 11 (29) | Cytoskeletal proteins and linkers/molecular motors |     |
| Tubulin alpha-2 chain                                                            | TUBA2    | Q6P9V9 | 3 (7)   | Cytoskeletal proteins and linkers/molecular motors |     |
| Tubulin beta chain                                                               |          | P04691 | 3 (10)  | Cytoskeletal proteins and linkers/molecular motors |     |
| Ubiquinol-cytochrome-c reductase complex core protein 2, mitochondrial precursor | UQCRC2   | P32551 | 10 (26) | Metabolism proteins                                |     |
| Ubiquitin                                                                        | RPS27A   | P62989 | 1 (9)   | Protein degradation pathways                       |     |
| Vacuolar ATP synthase subunit B, brain isoform                                   | ATP6V1B2 | P62815 | 2 (2)   | Metabolism proteins                                |     |
| Vimentin                                                                         | VIM      | P31000 | 2 (2)   | Cytoskeletal proteins and linkers/molecular motors |     |
| Voltage-dependent anion-selective channel protein 2                              | VDAC2    | P81155 | 4 (8)   | Transporters and channels                          | III |

a, Number of peptides identified with their total hit number in the parenthesis; b, Collecting duct database (CDDb) family group names; c, Membrane protein types: I, one membrane spanning helix with an extracellular N<sup>o</sup>-terminus; II, one membrane spanning helix with an extracellular C<sup>o</sup>-terminus; III, multiple membrane spanning helices; GPI, glycosylphosphatidylinositol-linked; d, Protein identifications confirmed by RT-PCR.

Table S-5. Number of proteins identified from the non-fixed perfusion- and incubation-biotinylated inner medullary collecting ducts (IMCDs).

| Non-fixed perfusion-biotinylated IMCDs  |                                       |                                       |                             |                                               |
|-----------------------------------------|---------------------------------------|---------------------------------------|-----------------------------|-----------------------------------------------|
| Peptide number <sup>a</sup>             | Original database search <sup>b</sup> | Reversed database search <sup>c</sup> | Net difference <sup>d</sup> | Manually accepted identification <sup>e</sup> |
| 1                                       | 497                                   | 452                                   | 45                          | 32                                            |
| 2                                       | 78                                    | 67                                    | 11                          | 20                                            |
| 3                                       | 25                                    | 12                                    | 13                          | 17                                            |
| 4                                       | 12                                    | 2                                     | 10                          | 10                                            |
| >4                                      | 41                                    | 0                                     | 41                          | 38                                            |
| Total                                   | 653                                   | 533                                   | 120                         | 117                                           |
| Non-fixed incubation-biotinylated IMCDs |                                       |                                       |                             |                                               |
| Peptide number <sup>a</sup>             | Original database search <sup>b</sup> | Reversed database search <sup>c</sup> | Net difference <sup>d</sup> | Manually accepted identification <sup>e</sup> |
| 1                                       | 140                                   | 19                                    | 121                         | 91                                            |
| 2                                       | 44                                    | 1                                     | 43                          | 41                                            |
| 3                                       | 29                                    | 0                                     | 29                          | 27                                            |
| 4                                       | 18                                    | 0                                     | 18                          | 15                                            |
| >4                                      | 65                                    | 0                                     | 65                          | 61                                            |
| Total                                   | 296                                   | 20                                    | 276                         | 235                                           |

a, Number of peptides identified for particular proteins; b, Number of proteins passing the default criteria of the Bioworks/Sequest search algorithm using the Swiss-Prot database; c, Same as b except the sequences in the database were reversed; d, Estimated number of proteins likely to be valid identifications; e, Number of proteins passing manual spectrum inspection.

Table S-6. Proteins identified from the non-fixed perfusion- and incubation-biotinylated inner medullary collecting ducts (IMCDs).

| Protein name                                                | Gene name | Accession | Ion (n) <sup>a</sup> | CDDB family <sup>b</sup>     | Type <sup>c</sup> | P/I  |
|-------------------------------------------------------------|-----------|-----------|----------------------|------------------------------|-------------------|------|
| 14-3-3 protein beta/alpha                                   | YWHAB     | P35213    | 2 (4)                | Signaling proteins           |                   | P    |
| 14-3-3 protein epsilon                                      | YWHAE     | P62260    | 6 (9)                | Signaling proteins           |                   | P    |
| 14-3-3 protein eta                                          | YWHAH     | P68511    | 3 (11)               | Signaling proteins           |                   | P    |
| 14-3-3 protein theta                                        | YWHAQ     | P68255    | 6 (13),<br>1(1)      | Signaling proteins           |                   | P, I |
| 14-3-3 protein zeta/delta                                   | YWHAZ     | P63102    | 6 (15),<br>1 (1)     | Signaling proteins           |                   | P, I |
| 150 kDa oxygen-regulated protein precursor                  | HYOU1     | Q63617    | 5 (5)                | Chaperones                   |                   | I    |
| 26S protease regulatory subunit 8                           | PSMC5     | P62198    | 1 (1)                | Protein degradation pathways |                   | I    |
| 3,2-trans-enoyl-CoA isomerase, mitochondrial precursor      | DCI       | P23965    | 3 (4)                | Biosynthetic proteins        |                   | I    |
| 3-hydroxyacyl-CoA dehydrogenase type-2                      | HADH2     | O70351    | 9 (11)               | Metabolism proteins          |                   | I    |
| 3-hydroxyisobutyrate dehydrogenase, mitochondrial precursor | HIBADH    | P29266    | 1 (1)                | Miscellaneous proteins       |                   | I    |
| 3-ketoacyl-CoA thiolase, mitochondrial                      | ACAA2     | P13437    | 5 (5)                | Metabolism proteins          |                   | I    |
| 3-mercaptopyruvate sulfurtransferase                        | MPST      | P97532    | 2 (2)                | Metabolism proteins          |                   | I    |
| 40S ribosomal protein S14                                   | RPS14     | P13471    | 1 (1)                | Biosynthetic proteins        |                   | I    |
| 40S ribosomal protein S2                                    | RPS2      | P27952    | 1 (1)                | Biosynthetic proteins        |                   | I    |
| 40S ribosomal protein S3                                    | RPS3      | P62909    | 1 (1)                | Biosynthetic proteins        |                   | I    |
| 40S ribosomal protein S3a                                   | RPS3A     | P49242    | 2 (2)                | Biosynthetic proteins        |                   | I    |
| 40S ribosomal protein S8                                    | RPS8      | P62243    | 1 (1)                | Biosynthetic proteins        |                   | I    |
| 40S ribosomal protein SA                                    | RPSA      | P38983    | 4 (5),<br>2 (3)      | Biosynthetic proteins        |                   | P, I |
| 47 kDa heat shock protein precursor                         | SERPINH1  | P29457    | 2 (2)                | Chaperones                   |                   | I    |
| 60 kDa heat shock protein, mitochondrial precursor          | HSPD1     | P63039    | 17 (19)              | Chaperones                   |                   | I    |
| 60S acidic ribosomal protein P0                             | RPLP0     | P19945    | 6 (7)                | Biosynthetic proteins        |                   | I    |

|                                                                        |        |        |                     |                                                    |      |
|------------------------------------------------------------------------|--------|--------|---------------------|----------------------------------------------------|------|
| 60S ribosomal protein L11                                              | RPL11  | P62914 | 1 (1)               | Biosynthetic proteins                              | I    |
| 60S ribosomal protein L18                                              | RPL18  | P12001 | 1 (1)               | Biosynthetic proteins                              | I    |
| 60S ribosomal protein L3                                               | RPL3   | P21531 | 1 (1)               | Biosynthetic proteins                              | I    |
| 60S ribosomal protein L31                                              | RPL31  | P62902 | 1 (1)               | Biosynthetic proteins                              | I    |
| 60S ribosomal protein L4                                               | RPL4   | P50878 | 1 (1)               | Biosynthetic proteins                              | I    |
| 60S ribosomal protein L6                                               | RPL6   | P21533 | 1 (1)               | Biosynthetic proteins                              | I    |
| 60S ribosomal protein L7                                               | RPL7   | P05426 | 1 (1)               | Biosynthetic proteins                              | I    |
| 60S ribosomal protein L7a                                              | RPL7A  | P62425 | 1 (1)               | Biosynthetic proteins                              | I    |
| 78 kDa glucose-regulated protein precursor                             | HSPA5  | P06761 | 14 (28),<br>14 (18) | Chaperones                                         | P, I |
| Acetyl-CoA acetyltransferase, mitochondrial precursor                  | ACAT1  | P17764 | 9 (23)              | Metabolism proteins                                | I    |
| Actin, alpha cardiac                                                   | ACTC   | P68035 | 19<br>(265)         | Cytoskeletal proteins and linkers/molecular motors | I    |
| Actin, alpha skeletal muscle                                           | ACTA1  | P68136 | 20 (42)             | Cytoskeletal proteins and linkers/molecular motors | P    |
| Actin, cytoplasmic 1                                                   | ACTB   | P60711 | 12 (34)             | Cytoskeletal proteins and linkers/molecular motors | P    |
| Actin, cytoplasmic 2                                                   | ACTG1  | P63259 | 13<br>(114)         | Cytoskeletal proteins and linkers/molecular motors | I    |
| Actin-related protein 2/3 complex subunit 1B                           | ARPC1B | O88656 | 2 (2)               | Cytoskeletal proteins and linkers/molecular motors | I    |
| Acyl-CoA dehydrogenase, long-chain specific, mitochondrial precursor   | ACADL  | P15650 | 3 (6)               | Metabolism proteins                                | I    |
| Acyl-CoA dehydrogenase, medium-chain specific, mitochondrial precursor | ACADM  | P08503 | 2 (3)               | Metabolism proteins                                | I    |

|                                                                                     |          |        |                    |                                                    |     |      |
|-------------------------------------------------------------------------------------|----------|--------|--------------------|----------------------------------------------------|-----|------|
| Acyl-CoA dehydrogenase, short/branched chain specific, mitochondrial precursor      | ACADSB   | P70584 | 1 (1)              | Metabolism proteins                                |     | I    |
| Acyl-CoA dehydrogenase, very-long-chain specific, mitochondrial precursor           | ACADVL   | P45953 | 4 (10)             | Metabolism proteins                                |     | I    |
| Adenosylhomocysteinase                                                              | AHCY     | P10760 | 1 (1)              | Biosynthetic proteins                              |     | I    |
| Adipocyte-derived leucine aminopeptidase precursor                                  | ARTS1    | Q9JJ22 | 1 (1)              | Aminopeptidases                                    |     | I    |
| ADP/ATP translocase 1                                                               | SLC25A4  | Q05962 | 2 (2)              | Transporters and channels                          | III | I    |
| ADP/ATP translocase 2                                                               | SLC25A5  | Q09073 | 4 (16)             | Transporters and channels                          | III | I    |
| Afadin- and alpha-actinin-binding protein                                           | SSX2IP   | Q8CGZ2 | 1 (3)              | Tight junction proteins                            |     | I    |
| Aldehyde dehydrogenase 1A3                                                          | ALDH1A3  | Q8K4D8 | 1 (1)              | Metabolism proteins                                |     | I    |
| Aldose reductase                                                                    | AKR1B1   | P07943 | 16 (62),<br>8(27)  | Stress proteins                                    |     | P, I |
| Alkaline phosphatase, tissue-nonspecific isozyme precursor                          | ALPL     | P08289 | 1 (1)              | Protein phosphatases                               | GPI | P    |
| Alpha crystallin B chain                                                            | CRYAB    | P23928 | 1 (1),<br>3 (5)    | Chaperones                                         |     | P, I |
| Alpha-1-antiproteinase precursor                                                    | SERPINA1 | P17475 | 10 (12)            | Secreted proteins                                  |     | P    |
| Alpha-actinin-1                                                                     | ACTN1    | Q9Z1P2 | 9 (16),<br>7(10)   | Cytoskeletal proteins and linkers/molecular motors |     | P, I |
| Alpha-actinin-4                                                                     | ACTN4    | Q9QXQ0 | 5 (9),<br>26 (56)  | Cytoskeletal proteins and linkers/molecular motors |     | P, I |
| Alpha-enolase                                                                       | ENO1     | P04764 | 8 (9)              | Metabolism proteins                                |     | I    |
| AMBP protein precursor                                                              | AMBP     | Q64240 | 5 (15)             | Secreted proteins                                  |     | P    |
| Aminopeptidase B                                                                    | RNPEP    | O09175 | 1 (1)              | Secreted proteins                                  |     | I    |
| Amyotrophic lateral sclerosis 2 chromosomal region candidate gene 3 protein homolog | TRAK2    | Q8R2H7 | 1 (52)             | Membrane trafficking proteins                      |     | P    |
| Annexin A1                                                                          | ANXA1    | P07150 | 5 (16),<br>8 (16)  | Membrane trafficking proteins                      |     | P, I |
| Annexin A2                                                                          | ANXA2    | Q07936 | 7 (15),<br>21 (55) | Membrane trafficking proteins                      |     | P, I |
| Annexin A4                                                                          | ANXA4    | P55260 | 3 (3)              | Membrane trafficking proteins                      |     | I    |

|                                                        |         |        |                   |                                    |     |                |
|--------------------------------------------------------|---------|--------|-------------------|------------------------------------|-----|----------------|
| Annexin A5                                             | ANXA5   | P14668 | 1 (1),<br>4 (6)   | Membrane<br>trafficking proteins   |     | P, I           |
| Annexin A6                                             | ANXA6   | P48037 | 4 (4)             | Membrane<br>trafficking proteins   |     | I              |
| AP-2 complex subunit alpha-2                           | AP2A2   | P18484 | 1 (1)             | Membrane<br>trafficking proteins   |     | I              |
| AP-2 complex subunit beta-1                            | AP2B1   | P62944 | 2 (4)             | Membrane<br>trafficking proteins   |     | I              |
| Aquaporin-1                                            | AQP1    | P29975 | 4 (37),<br>4 (5)  | Transporters and<br>channels       | III | P, I           |
| Aquaporin-2                                            | AQP2    | P34080 | 2 (9),<br>3 (7)   | Transporters and<br>channels       | III | P, I           |
| Aquaporin-4                                            | AQP4    | P47863 | 3 (4),<br>1 (1)   | Transporters and<br>channels       | III | P, I           |
| Arginase-2, mitochondrial<br>precursor                 | ARG2    | O08701 | 2 (2)             | Biosynthetic<br>proteins           |     | I              |
| Aspartate aminotransferase,<br>mitochondrial precursor | GOT2    | P00507 | 8 (10)            | Biosynthetic<br>proteins           |     | I              |
| ATP synthase alpha chain,<br>mitochondrial precursor   | ATP5A1  | P15999 | 18 (74)           | Metabolism<br>proteins             |     | I              |
| ATP synthase B chain,<br>mitochondrial precursor       | ATP5F1  | P19511 | 6 (6)             | Metabolism<br>proteins             |     | I              |
| ATP synthase beta chain,<br>mitochondrial precursor    | ATP5B   | P10719 | 23 (42)           | Metabolism<br>proteins             |     | I              |
| ATP synthase gamma chain,<br>mitochondrial             | ATP5C1  | P35435 | 3 (3)             | Metabolism<br>proteins             |     | I              |
| ATP-citrate synthase                                   | ACLY    | P16638 | 4 (5)             | Biosynthetic<br>proteins           |     | I              |
| Band 3 anion transport protein                         | SLC4A1  | P23562 | 1 (1)             | Transporters and<br>channels       | III | I              |
| Barttin                                                | BSND    | Q8R2H3 | 7 (47)            | Transporters and<br>channels       | III | P              |
| Basigin precursor                                      | BSG     | P26453 | 2 (2)             | Transporters and<br>channels       | I   | I              |
| Beta-catenin                                           | CTNNB1  | Q9WU82 | 6 (7)             | Signaling proteins                 |     | I              |
| Calcium-binding protein p22                            | CHP     | P61023 | 1 (1),<br>1 (1)   | Membrane<br>trafficking proteins   |     | P, I           |
| Calcyclin                                              | S100A11 | Q6B345 | 1 (1)             | Biosynthetic<br>proteins           |     | I (RT-<br>PCR) |
| Calnexin precursor                                     | CANX    | P35565 | 2 (7),<br>13 (27) | Chaperones                         | I   | P, I           |
| Calpain small subunit 1                                | CAPNS1  | Q64537 | 2 (2)             | Protein<br>degradation<br>pathways |     | I              |



|                                                   |         |        |                  |                                                    |     |            |
|---------------------------------------------------|---------|--------|------------------|----------------------------------------------------|-----|------------|
| Calpain-1 catalytic subunit                       | CAPN1   | P97571 | 5 (6)            | Protein degradation pathways                       |     | I          |
| Calpain-2 catalytic subunit precursor             | CAPN2   | Q07009 | 1 (1)            | Protein degradation pathways                       |     | I          |
| Calponin-3                                        | CNN3    | P37397 | 1 (1)            | Cytoskeletal proteins and linkers/molecular motors |     | P          |
| Calreticulin precursor                            | CALR    | P18418 | 3 (4)            | Chaperones                                         |     | I          |
| Calumenin precursor                               | CALU    | O35783 | 1 (1)            | Miscellaneous proteins                             |     | I          |
| Carbonic anhydrase 4 precursor                    | CA4     | P48284 | 1 (4)            | Transporters and channels (related)                | GPI | P (RT-PCR) |
| Carnitine O-palmitoyltransferase I, liver isoform | CPT1A   | P32198 | 3 (4)            | Metabolism proteins                                | III | I          |
| Casein kinase II subunit alpha                    | CSNK2A1 | P19139 | 1 (1)            | Protein kinases, serine/threonine                  |     | I          |
| Catalase                                          | CAT     | P04762 | 1 (1)            | Stress proteins                                    |     | I          |
| Caveolin-1                                        | CAV1    | P41350 | 1 (4)            | Membrane trafficking proteins                      | III | I          |
| CD151 antigen                                     | CD151   | Q9QZA6 | 1 (1)            | Adhesion proteins and collagens                    | III | I          |
| CD166 antigen precursor                           | ALCAM   | O35112 | 1 (2)            | Adhesion proteins and collagens                    | I   | I (RT-PCR) |
| CD48 antigen precursor                            | CD48    | P10252 | 3 (4)            | Signaling proteins                                 | GPI | P          |
| CD59 glycoprotein precursor                       | CD59    | P27274 | 1 (5)            | Miscellaneous proteins                             | GPI | P (RT-PCR) |
| Ceruloplasmin precursor                           | CP      | P13635 | 40 (111), 2 (2)  | Secreted proteins                                  |     | P, I       |
| Chloride channel protein ClC-Ka                   | CLCNKA  | Q06393 | 2 (3)            | Transporters and channels                          | III | I          |
| Class I histocompatibility antigen, Non-RT1       | RT1-AW2 | P15978 | 1 (4)            | Miscellaneous proteins                             | I   | I          |
| Clathrin heavy chain                              | CLTC    | P11442 | 11 (11), 10 (13) | Membrane trafficking proteins                      |     | P, I       |
| Clathrin light chain A                            | CLTA    | P08081 | 3 (7)            | Membrane trafficking proteins                      |     | P          |
| Clathrin light chain B                            | CLTB    | P08082 | 1 (2)            | Membrane trafficking proteins                      |     | P          |
| Clusterin precursor                               | CLU     | P05371 | 13 (35)          | Secreted proteins                                  |     | P          |
| Coatomer subunit beta                             | COPB    | P23514 | 2 (2)            | Membrane trafficking proteins                      |     | I          |

|                                                                                                                            |          |        |                  |                                                    |     |      |
|----------------------------------------------------------------------------------------------------------------------------|----------|--------|------------------|----------------------------------------------------|-----|------|
| Complement C3 precursor                                                                                                    | C3       | P01026 | 5 (11)           | Secreted proteins                                  |     | P    |
| Contactin-1 precursor                                                                                                      | CNTN1    | Q63198 | 2 (2)            | Signaling proteins                                 | GPI | P    |
| Core histone macro-H2A.1                                                                                                   | H2AFY    | Q02874 | 3 (4)            | Nuclear proteins                                   |     | P    |
| Corticosteroid 11-beta-dehydrogenase isozyme 2                                                                             | HSD11B2  | P50233 | 5 (6)            | Steroid metabolizing enzymes                       |     | I    |
| Creatine kinase, ubiquitous mitochondrial precursor                                                                        | CKMT1    | P25809 | 1 (1)            | Metabolism proteins                                |     | I    |
| Cytochrome b5 outer mitochondrial membrane isoform precursor                                                               | CYB5M    | P04166 | 1 (2)            | Metabolism proteins                                |     | P    |
| Cytochrome c oxidase subunit 2                                                                                             | MTCO2    | P00406 | 1 (1)            | Metabolism proteins                                | III | I    |
| Cytochrome c oxidase subunit 4 isoform 1, mitochondrial precursor                                                          | COX4I1   | P10888 | 1 (1)            | Metabolism proteins                                |     | P    |
| Cytoplasmic dynein 1 intermediate chain 2                                                                                  | DYNC1I2  | Q62871 | 1 (1)            | Cytoskeletal proteins and linkers/molecular motors |     | I    |
| Cytosolic acyl coenzyme A thioester hydrolase                                                                              | ACOT7    | Q64559 | 1 (2)            | Metabolism proteins                                |     | P    |
| D-beta-hydroxybutyrate dehydrogenase, mitochondrial precursor                                                              | BDH1     | P29147 | 1 (1)            | Miscellaneous proteins                             |     | I    |
| Desmin                                                                                                                     | DES      | P48675 | 3 (4)            | Cytoskeletal proteins and linkers/molecular motors |     | P    |
| Dihydrolipoyllysine-residue acetyltransferase component of pyruvate dehydrogenase complex                                  | DLAT     | P08461 | 2 (4)            | Metabolism proteins                                |     | I    |
| Dihydrolipoyllysine-residue succinyltransferase component of 2-oxoglutarate dehydrogenase complex, mitochondrial precursor | DLST     | Q01205 | 1 (1)            | Metabolism proteins                                |     | I    |
| Dihydropyridine-sensitive L-type, calcium channel alpha-2/delta subunits precursor                                         | CACNA2D1 | P54290 | 7 (24)           | Transporters and channels                          | III | P    |
| Disks large homolog 1                                                                                                      | DLG1     | Q62696 | 7 (13)           | Anchor scaffold proteins                           |     | P    |
| Dynein heavy chain, cytosolic                                                                                              | DYNC1H1  | P38650 | 9 (11)           | Cytoskeletal proteins and linkers/molecular motors |     | I    |
| Elongation factor 1-alpha 2                                                                                                | EEF1A2   | P62632 | 4 (6),<br>4 (11) | Biosynthetic proteins                              |     | P, I |

|                                                             |         |        |                       |                                                    |      |
|-------------------------------------------------------------|---------|--------|-----------------------|----------------------------------------------------|------|
| Elongation factor 2                                         | EEF2    | P05197 | 3 (3)                 | Biosynthetic proteins                              | I    |
| Enoyl-CoA hydratase, mitochondrial precursor                | ECHS1   | P14604 | 3 (3)                 | Biosynthetic proteins                              | I    |
| Epithelial-cadherin precursor                               | CDH1    | Q9R0T4 | 5 (78)                | Adhesion proteins and collagens                    | I P  |
| Fatty aldehyde dehydrogenase                                | ALDH3A2 | P30839 | 1 (2)                 | Metabolism proteins                                | I    |
| Fibrinogen beta chain precursor                             | FGB     | P14480 | 3 (5)                 | Secreted proteins                                  | P    |
| Fructose-bisphosphate aldolase A                            | ALDOA   | P05065 | 2 (2)                 | Metabolism proteins                                | I    |
| Fumarate hydratase, mitochondrial precursor                 | FH      | P14408 | 2 (2)                 | Metabolism proteins                                | I    |
| Galectin-3                                                  | LGALS3  | P08699 | 1 (4)                 | Adhesion proteins and collagens                    | P    |
| Gamma-enolase                                               | ENO2    | P07323 | 2 (2)                 | Metabolism proteins                                | I    |
| Glial fibrillary acidic protein, astrocyte                  | GFAP    | P47819 | 3 (77),<br>1 (19)     | Cytoskeletal proteins and linkers/molecular motors | P, I |
| Glutamate dehydrogenase 1, mitochondrial precursor          | GLUD1   | P10860 | 5 (5)                 | Metabolism proteins                                | I    |
| Glutaminase kidney isoform, mitochondrial precursor         | GLS     | P13264 | 2 (3)                 | Metabolism proteins                                | I    |
| Glutathione peroxidase 1                                    | GPX1    | P04041 | 21<br>(102),<br>1 (1) | Stress proteins                                    | P, I |
| Glutathione peroxidase 2                                    | GPX2    | P83645 | 2 (5)                 | Stress proteins                                    | P    |
| Glutathione peroxidase 3 precursor                          | GPX3    | P23764 | 9 (38)                | Secreted proteins                                  | P    |
| Glutathione peroxidase 6 precursor                          | GPX6    | Q64625 | 3 (5)                 | Stress proteins                                    | P    |
| Glutathione S-transferase Mu 2                              | GSTM2   | P08010 | 1 (1)                 | Stress proteins                                    | I    |
| Glyceraldehyde-3-phosphate dehydrogenase                    | GAPDH   | P04797 | 7 (17)                | Metabolism proteins                                | I    |
| Glycerol kinase                                             | GK      | Q63060 | 1 (1)                 | Metabolism proteins                                | I    |
| Glycerol-3-phosphate dehydrogenase, mitochondrial precursor | GPD2    | P35571 | 2 (4)                 | Metabolism proteins                                | I    |
| Glycogen phosphorylase, brain form                          | PYGB    | P53534 | 5 (6)                 | Metabolism proteins                                | I    |
| Golgi apparatus protein 1 precursor                         | GLG1    | Q62638 | 2 (2)                 | Biosynthetic proteins                              | P    |

|                                                          |          |        |                    |                                                 |      |
|----------------------------------------------------------|----------|--------|--------------------|-------------------------------------------------|------|
| Golgi resident protein GCP60                             | ACBD3    | Q7TNY6 | 3 (4)              | Biosynthetic proteins                           | P    |
| GTP-binding nuclear protein Ran                          | RAN      | P62828 | 1 (1)              | Small GTP binding proteins and related proteins | I    |
| Guanine nucleotide-binding protein alpha-11 subunit      | GNA11    | Q9JID2 | 3 (3)              | Heterotrimeric G proteins                       | I    |
| Guanine nucleotide-binding protein beta subunit 2-like 1 | GNB2L1   | P63245 | 1 (1)              | Heterotrimeric G proteins                       | I    |
| Guanine nucleotide-binding protein beta subunit 4        | GNB4     | O35353 | 2 (6)              | Heterotrimeric G-proteins                       | P    |
| Guanine nucleotide-binding protein G                     | GNAI2    | P04897 | 1 (1),<br>7 (8)    | Heterotrimeric G proteins                       | P, I |
| Guanine nucleotide-binding protein G                     | GNAI3    | P08753 | 1 (2)              | Heterotrimeric G-proteins                       | P    |
| Guanine nucleotide-binding protein G                     | GNAQ     | P82471 | 2 (2)              | Heterotrimeric G proteins                       | I    |
| Guanine nucleotide-binding protein G                     | GNB1     | P54311 | 1 (2)              | Heterotrimeric G-proteins                       | P    |
| Guanine nucleotide-binding protein G                     | GNB2     | P54313 | 1 (2),<br>3 (3)    | Heterotrimeric G proteins                       | P, I |
| Heat shock 70 kDa protein 1A/1B                          | HSPA1A   | Q07439 | 4 (9),<br>12 (26)  | Chaperones                                      | P, I |
| Heat shock cognate 71 kDa protein                        | HSPA8    | P63018 | 15 (30),<br>6 (10) | Chaperones                                      | P, I |
| Heat shock protein HSP 90-beta                           | HSP90AB1 | P34058 | 10 (11)            | Chaperones                                      | I    |
| Heat shock-related 70 kDa protein 2                      | HSPA2    | P14659 | 1 (1),<br>4 (4)    | Chaperones                                      | P, I |
| Heat-shock protein beta-1                                | HSPB1    | P42930 | 6 (10)             | Chaperones                                      | I    |
| Heme oxygenase 2                                         | HMOX2    | P23711 | 1 (1)              | Miscellaneous proteins                          | I    |
| Hemoglobin alpha-1/2 subunit                             | HBA1     | P01946 | 5 (8)              | Binding proteins                                | P    |
| Hemoglobin beta-1 subunit                                | HBB      | P02091 | 2 (13)             | Binding proteins                                | P    |
| Hemoglobin beta-2 subunit                                |          | P11517 | 4 (15)             | Binding proteins                                | P    |
| Heterogeneous nuclear ribonucleoprotein A1               | HNRPA1   | P04256 | 1 (2)              | Nuclear proteins                                | I    |
| Heterogeneous nuclear ribonucleoprotein A3               | HNRPA3   | Q6URK4 | 3 (3)              | Nuclear proteins                                | I    |
| Heterogeneous nuclear ribonucleoprotein D0               | HNRPD    | Q9JJ54 | 2 (3)              | Nuclear proteins                                | I    |
| Heterogeneous nuclear ribonucleoprotein K                | HNRPK    | P61980 | 3 (4)              | Nuclear proteins                                | I    |
| Hexokinase-1                                             | HK1      | P05708 | 2 (3)              | Metabolism proteins                             | I    |

|                                                             |               |        |                     |                                                             |     |      |
|-------------------------------------------------------------|---------------|--------|---------------------|-------------------------------------------------------------|-----|------|
| Histone H1.0                                                | H1F0          | P43278 | 1 (1)               | Nuclear proteins                                            |     | I    |
| Histone H1.2                                                | HIST1H1C      | P15865 | 1 (1)               | Nuclear proteins                                            |     | I    |
| Histone H2B                                                 |               | Q00715 | 2 (2)               | Nuclear proteins                                            |     | P    |
| Histone H2B, testis                                         | HIST1H2B<br>A | Q00729 | 1 (3),<br>1 (1)     | Nuclear proteins                                            |     | P, I |
| Histone H4                                                  | HIST1H4B      | P62804 | 3 (12),<br>1 (1)    | Nuclear proteins                                            |     | P, I |
| Hydroxymethylglutaryl-CoA<br>lyase, mitochondrial precursor | HMGCL         | P97519 | 1 (1)               | Metabolism<br>proteins                                      |     | I    |
| Ig kappa chain C region, A allele                           |               | P01836 | 2 (4)               | Secreted proteins                                           |     | P    |
| Ig kappa chain C region, B allele                           |               | P01835 | 2 (5)               | Secreted proteins                                           |     | P    |
| Inositol 1,4,5-trisphosphate<br>receptor 1                  | ITPR1         | P29994 | 1 (2)               | Transporters and<br>channels                                | III | I    |
| Inositol 1,4,5-trisphosphate<br>receptor 2                  | ITPR2         | P29995 | 1 (1)               | Transporters and<br>channels                                | III | I    |
| Integrin alpha-1 precursor                                  | ITGA1         | P18614 | 2 (2)               | Adhesion proteins<br>and collagens                          | I   | I    |
| Intercellular adhesion molecule 1<br>precursor              | ICAM1         | Q00238 | 1 (1)               | Adhesion proteins<br>and collagens                          | I   | I    |
| Interferon-induced GTP-binding<br>protein Mx2               | MX2           | P18589 | 1 (1)               | Membrane<br>trafficking proteins                            |     | I    |
| Interferon-induced GTP-binding<br>protein Mx3               | MX3           | P18590 | 1 (1)               | Membrane<br>trafficking proteins                            |     | I    |
| Isovaleryl-CoA dehydrogenase,<br>mitochondrial precursor    | IVD           | P12007 | 2 (4)               | Metabolism<br>proteins                                      |     | I    |
| Keratin, II cytoskeletal 8                                  | KRT8          | Q10758 | 9 (29)              | Cytoskeletal<br>proteins and<br>linkers/molecular<br>motors |     | I    |
| Keratin, type I cytoskeletal 19                             | KRT19         | Q63279 | 15 (81),<br>15 (12) | Cytoskeletal<br>proteins and<br>linkers/molecular<br>motors |     | P, I |
| Keratin, type I cytoskeletal 20                             | KRT20         | P25030 | 4 (65),<br>2 (5)    | Cytoskeletal<br>proteins and<br>linkers/molecular<br>motors |     | P, I |
| Kinesin-like protein KIF2C                                  | KIF2C         | Q62909 | 2 (4)               | Cytoskeletal<br>proteins and<br>linkers/molecular<br>motors |     | P    |
| Lamin-A                                                     | LMNA          | P48679 | 3 (3),<br>5 (7)     | Cytoskeletal<br>proteins and<br>linkers/molecular<br>motors |     | P, I |

|                                                                                                  |          |        |                  |                                                    |     |            |
|--------------------------------------------------------------------------------------------------|----------|--------|------------------|----------------------------------------------------|-----|------------|
| Lamin-B1                                                                                         | LMNB1    | P70615 | 7 (15),<br>1 (2) | Cytoskeletal proteins and linkers/molecular motors |     | P, I       |
| Laminin beta-2 chain precursor                                                                   | LAMB2    | P15800 | 2 (3),<br>2 (2)  | Adhesion proteins and collagens                    |     | P, I       |
| LIN-7 homolog A                                                                                  | LIN7A    | Q9Z250 | 1 (1)            | Anchor scaffold proteins                           |     | P          |
| LIN-7 homolog C                                                                                  | LIN7C    | Q792I0 | 5 (7)            | Anchor scaffold proteins                           |     | P          |
| Lipid phosphate phosphohydrolase 3                                                               | PPAP2B   | P97544 | 1 (2)            | Metabolism proteins                                | III | I          |
| L-lactate dehydrogenase A chain                                                                  | LDHA     | P04642 | 3 (3)            | Metabolism proteins                                |     | I          |
| L-lactate dehydrogenase B chain                                                                  | LDHB     | P42123 | 1 (1)            | Metabolism proteins                                |     | I          |
| Lysosome-associated membrane glycoprotein 1 precursor                                            | LAMP1    | P14562 | 1 (1)            | Membrane trafficking proteins                      | I   | I          |
| Malate dehydrogenase, mitochondrial precursor                                                    | MDH2     | P04636 | 9 (32)           | Metabolism proteins                                |     | I          |
| Merlin                                                                                           | NF2      | Q63648 | 1 (2)            | Cytoskeletal proteins and linkers/molecular motors |     | P          |
| Methylmalonate-semialdehyde dehydrogenase [acylating], mitochondrial precursor                   | ALDH6A1  | Q02253 | 5 (7)            | Metabolism proteins                                |     | I          |
| Mitochondrial 2-oxoglutarate/malate carrier protein                                              | SLC25A11 | P97700 | 2 (3)            | Transporters and channels                          | III | I          |
| Moesin                                                                                           | MSN      | O35763 | 2 (2),<br>3 (3)  | Cytoskeletal proteins and linkers/molecular motors |     | P, I       |
| Monocarboxylate transporter 2, MCT2                                                              | SLC16A7  | Q63344 | 1 (2)            | Transporters and channels                          | III | I (RT-PCR) |
| Monocyte differentiation antigen CD14 precursor                                                  | CD14     | Q63691 | 3 (6)            | Signaling proteins                                 | GPI | P          |
| Monoglyceride lipase                                                                             | MGLL     | Q8R431 | 1 (1)            | Metabolism proteins                                |     | I          |
| Multifunctional protein ADE2 [Includes: Phosphoribosylaminoimidazole-succinocarboxamide synthase | PAICS    | P51583 | 2 (3)            | Biosynthetic proteins                              |     | I          |
| Myosin heavy chain, fast skeletal muscle, embryonic                                              | MYH3     | P12847 | 1 (1)            | Cytoskeletal proteins and linkers/molecular motors |     | I          |

|                                                                                                         |          |        |                        |                                                    |      |
|---------------------------------------------------------------------------------------------------------|----------|--------|------------------------|----------------------------------------------------|------|
| Myosin Ib                                                                                               | MYO1A    | Q05096 | 3 (4)                  | Cytoskeletal proteins and linkers/molecular motors | I    |
| Myosin Id                                                                                               | MYO1D    | Q63357 | 1 (1),<br>6 (9)        | Cytoskeletal proteins and linkers/molecular motors | P, I |
| Myosin Ie                                                                                               | MYO1E    | Q63356 | 2 (2)                  | Cytoskeletal proteins and linkers/molecular motors | I    |
| Myosin light polypeptide 6                                                                              | MYL6     | Q64119 | 1 (3)                  | Cytoskeletal proteins and linkers/molecular motors | I    |
| Myosin-10                                                                                               | MYH10    | Q9JLT0 | 4 (18),<br>71<br>(141) | Cytoskeletal proteins and linkers/molecular motors | P, I |
| Myosin-11                                                                                               | MYH11    | Q63862 | 7 (33)                 | Cytoskeletal proteins and linkers/molecular motors | I    |
| Myosin-5B                                                                                               | MYO5B    | P70569 | 1 (1)                  | Cytoskeletal proteins and linkers/molecular motors | I    |
| Myosin-9                                                                                                | MYH9     | Q62812 | 67<br>(137)            | Cytoskeletal proteins and linkers/molecular motors | I    |
| Na(+)/H(+) exchange regulatory cofactor NHE-RF2 (NHERF-2) (Tyrosine kinase activator protein 1) (TKA-1) | SLC9A3R2 | Q920G2 | 1 (1)                  | Cytoskeletal proteins and linkers/molecular motors | I    |
| NADH-ubiquinone oxidoreductase 24 kDa subunit, mitochondrial precursor                                  | NDUFV2   | P19234 | 1 (1)                  | Metabolism proteins                                | I    |
| Neurabin-2                                                                                              | PPP1R9B  | O35274 | 1 (2)                  | Cytoskeletal proteins and linkers/molecular motors | P    |
| Neurofilament triplet H protein                                                                         | NEFH     | P16884 | 1 (1)                  | Cytoskeletal proteins and linkers/molecular motors | I    |
| Nuclease sensitive element-binding protein 1                                                            | YBX1     | P62961 | 1 (1)                  | Miscellaneous proteins                             | I    |

|                                                               |         |        |                 |                                                    |     |            |
|---------------------------------------------------------------|---------|--------|-----------------|----------------------------------------------------|-----|------------|
| Nucleolin                                                     | NCL     | P13383 | 1 (1)           | Nuclear proteins                                   |     | I          |
| Ornithine aminotransferase, mitochondrial precursor           | OAT     | P04182 | 1 (1)           | Biosynthetic proteins                              |     | I          |
| Peripherin                                                    | PRPH    | P21807 | 3 (15)          | Cytoskeletal proteins and linkers/molecular motors |     | P          |
| Peroxiredoxin-1                                               | PRDX1   | Q63716 | 3 (5)           | Stress proteins                                    |     | P          |
| Peroxiredoxin-5, mitochondrial precursor                      | PRDX5   | Q9R063 | 1 (1)           | Stress proteins                                    |     | P          |
| Peroxiredoxin-6                                               | PRDX6   | O35244 | 2 (2)           | Stress proteins                                    |     | I          |
| Peroxisomal multifunctional enzyme 2                          | HSD17B4 | P97852 | 5 (6)           | Metabolism proteins                                |     | I          |
| Phosphate carrier protein, mitochondrial precursor            | SLC25A3 | P16036 | 2 (5)           | Transporters and channels                          | III | I          |
| Phosphoglycerate kinase 1                                     | PGK1    | P16617 | 1 (1)           | Metabolism proteins                                |     | I          |
| Phospholipid hydroperoxide glutathione peroxidase, nuclear    | GPX4    | Q91XR8 | 5 (18)          | Stress proteins                                    |     | P          |
| Plastin-3                                                     | PLS3    | Q63598 | 3 (4)           | Cytoskeletal proteins and linkers/molecular motors |     | I          |
| Plectin 1                                                     | PLEC1   | P30427 | 9 (11)          | Cytoskeletal proteins and linkers/molecular motors |     | I          |
| Podocalyxin precursor                                         | PODXL   | Q9WTQ2 | 1 (1)           | Adhesion proteins and collagens                    | I   | I (RT-PCR) |
| Potassium-transporting ATPase alpha chain 2                   | ATP12A  | P54708 | 2 (3)           | Ion pumps                                          | III | I          |
| Profilin-1                                                    | PFN1    | P62963 | 1 (2)           | Cytoskeletal proteins and linkers/molecular motors |     | I          |
| Programmed cell death protein 8, mitochondrial precursor      | PDCD8   | Q9JM53 | 1 (1),<br>6 (8) | Apoptosis proteins                                 |     | P, I       |
| Prohibitin                                                    | PHB     | P67779 | 5 (6)           | Miscellaneous proteins                             |     | I          |
| Propionyl-CoA carboxylase beta chain, mitochondrial precursor | PCCB    | P07633 | 5 (8),<br>4 (5) | Metabolism proteins                                |     | P, I       |
| Prostaglandin G/H synthase 1 precursor                        | PTGS1   | Q63921 | 3 (5)           | Signaling proteins                                 |     | I          |
| Prostasin precursor                                           | PRSS8   | Q9ES87 | 1 (2)           | Metabolism proteins                                |     | P          |



|                                                                                          |          |        |                 |                                                 |     |      |
|------------------------------------------------------------------------------------------|----------|--------|-----------------|-------------------------------------------------|-----|------|
| Protein disulfide-isomerase A3 precursor                                                 | PDIA3    | P11598 | 14 (24)         | Biosynthetic proteins                           |     | I    |
| Protein disulfide-isomerase A4 precursor                                                 | PDIA4    | P38659 | 3 (3)           | Biosynthetic proteins                           |     | I    |
| Protein disulfide-isomerase A6 precursor                                                 | PDIA6    | Q63081 | 2 (2),<br>4 (4) | Biosynthetic proteins                           |     | P, I |
| Protein disulfide-isomerase precursor                                                    | P4HB     | P04785 | 6 (7),<br>6 (6) | Biosynthetic proteins                           |     | P, I |
| Protein KIAA0152 precursor                                                               | KIAA0152 | Q5FVQ4 | 1 (2)           | Miscellaneous proteins                          | I   | P    |
| Pyruvate dehydrogenase E1 component alpha subunit, somatic form, mitochondrial precursor | PDHA1    | P26284 | 2 (5)           | Metabolism proteins                             |     | I    |
| Pyruvate dehydrogenase E1 component beta subunit, mitochondrial precursor                | PDHB     | P49432 | 4 (6)           | Metabolism proteins                             |     | I    |
| Pyruvate kinase isozymes M1/M2                                                           | PKM2     | P11980 | 14 (28)         | Metabolism proteins                             |     | I    |
| Ras-related protein Rab-14                                                               | RAB14    | P61107 | 2 (3)           | Small GTP binding proteins and related proteins |     | I    |
| Ras-related protein Rab-1A                                                               | RAB1A    | Q6NYB7 | 1 (1)           | Small GTP binding proteins and related proteins |     | I    |
| Ras-related protein Rab-7                                                                | RAB7     | P09527 | 2 (2)           | Small GTP binding proteins and related proteins |     | I    |
| Reticulon-4                                                                              | RTN4     | Q9JK11 | 8 (24)          | Membrane trafficking proteins                   | III | I    |
| Retinal dehydrogenase 1                                                                  | ALDH1A1  | P51647 | 4 (4)           | Metabolism proteins                             |     | I    |
| S100 calcium-binding protein A4                                                          | S100A4   | P05942 | 1 (1)           | Biosynthetic proteins                           |     | I    |
| Serine/threonine-protein phosphatase 2A catalytic subunit alpha isoform                  | PPP2CA   | P63331 | 3 (4)           | Protein phosphatases                            |     | P    |
| Serine/threonine-protein phosphatase PP1-alpha catalytic subunit                         | PPP1CA   | P62138 | 4 (7)           | Protein phosphatases                            |     | P    |
| Serine/threonine-protein phosphatase PP1-beta catalytic subunit                          | PPP1CB   | P62142 | 3 (6)           | Protein phosphatases                            |     | P    |
| Serine/threonine-protein phosphatase PP1-gamma catalytic subunit                         | PPP1CC   | P63088 | 9 (14)          | Protein phosphatases                            |     | P    |
| Serum albumin precursor                                                                  | ALB      | P02770 | 6 (7)           | Secreted proteins                               |     | I    |

|                                                                                    |        |        |                    |                                                    |     |      |
|------------------------------------------------------------------------------------|--------|--------|--------------------|----------------------------------------------------|-----|------|
| Short chain 3-hydroxyacyl-CoA dehydrogenase, mitochondrial precursor               | HADHSC | Q9WVK7 | 2 (2)              | Metabolism proteins                                |     | I    |
| Sideroflexin-3                                                                     | SFXN3  | Q9JHY2 | 3 (4)              | Transporters and channels                          | III | I    |
| Sodium/potassium-transporting ATPase alpha-1 chain precursor                       | ATP1A1 | P06685 | 26 (134)           | Ion pumps                                          | III | I    |
| Sodium/potassium-transporting ATPase alpha-3 chain                                 | ATP1A3 | P06687 | 15 (63)            | Ion pumps                                          | III | I    |
| Sodium/potassium-transporting ATPase alpha-4 chain                                 | ATP1A4 | Q64541 | 2 (3)              | Ion pumps                                          | III | I    |
| Sodium/potassium-transporting ATPase beta-1 chain                                  | ATP1B1 | P07340 | 6 (14)             | Ion pumps                                          | II  | I    |
| Sodium/potassium-transporting ATPase beta-3 chain                                  | ATP1B3 | Q63377 | 1 (3)              | Ion pumps                                          | II  | I    |
| Sodium/potassium-transporting ATPase gamma chain                                   | FXYD2  | Q04679 | 1 (1)              | Ion pumps                                          | II  | I    |
| Spectrin alpha chain, brain                                                        | SPTAN1 | P16086 | 81 (157), 70 (151) | Cytoskeletal proteins and linkers/molecular motors |     | P, I |
| Spectrin beta chain, brain 2                                                       | SPTBN2 | Q9QWN8 | 51 (94)            | Cytoskeletal proteins and linkers/molecular motors |     | I    |
| S-phase kinase-associated protein 1A                                               | SKP1A  | Q6PEC4 | 1 (2)              | Protein degradation pathway                        |     | P    |
| Stress-70 protein, mitochondrial precursor                                         | HSPA9  | P48721 | 14 (16)            | Chaperones                                         |     | P, I |
| Succinate dehydrogenase [ubiquinone] flavoprotein subunit, mitochondrial precursor | SDHA   | Q920L2 | 1 (1)              | Metabolism proteins                                |     | P    |
| Succinate dehydrogenase [ubiquinone] flavoprotein subunit, mitochondrial precursor | SDHA   | Q920L2 | 3 (4)              | Metabolism proteins                                |     | I    |
| Succinyl-CoA ligase [GDP-forming] alpha-chain, mitochondrial precursor             | SUCLG1 | P13086 | 1 (1)              | Miscellaneous proteins                             |     | I    |
| Superoxide dismutase [Mn], mitochondrial precursor                                 | SOD2   | P07895 | 1 (1)              | Stress proteins                                    |     | P    |
| Syntaxin-7                                                                         | STX7   | O70257 | 1 (1)              | Membrane trafficking proteins                      | II  | I    |
| T-cell surface glycoprotein CD1d precursor                                         | CD1D   | Q63493 | 1 (1)              | Adhesion proteins and collagens                    | I   | I    |
| T-complex protein 1 subunit alpha                                                  | CCT1   | P28480 | 1 (1)              | Chaperones                                         |     | I    |

|                                                                               |          |        |                 |                                                    |     |      |
|-------------------------------------------------------------------------------|----------|--------|-----------------|----------------------------------------------------|-----|------|
| Thy-1 membrane glycoprotein precursor                                         | THY1     | P01830 | 2 (5)           | Adhesion proteins and collagens                    | GPI | P    |
| Timeless homolog                                                              | TIMELESS | Q9Z2Y1 | 2 (2)           | Nuclear proteins                                   |     | P    |
| Transitional endoplasmic reticulum ATPase                                     | VCP      | P46462 | 3 (3)           | Membrane trafficking proteins                      |     | I    |
| Transketolase                                                                 | TKT      | P50137 | 1 (1)           | Metabolism proteins                                |     | I    |
| Transthyretin precursor                                                       | TTR      | P02767 | 2 (2)           | Secreted proteins                                  |     | P    |
| Trifunctional enzyme alpha subunit, mitochondrial precursor                   | HADHA    | Q64428 | 13 (16)         | Metabolism proteins                                |     | I    |
| Trifunctional enzyme beta subunit, mitochondrial precursor                    | HADHB    | Q60587 | 2 (2)           | Metabolism proteins                                |     | I    |
| Triosephosphate isomerase                                                     | TPI1     | P48500 | 4 (6),<br>5 (6) | Biosynthetic proteins                              |     | P, I |
| Tropomyosin 1 alpha chain                                                     | TPM1     | P04692 | 6 (9),<br>3 (4) | Cytoskeletal proteins and linkers/molecular motors |     | P, I |
| Tropomyosin alpha-4 chain                                                     | TPM4     | P09495 | 3 (3)           | Cytoskeletal proteins and linkers/molecular motors |     | I    |
| Tropomyosin beta chain                                                        | TPM2     | P58775 | 1 (1)           | Cytoskeletal proteins and linkers/molecular motors |     | I    |
| Tubulin alpha-1 chain                                                         | TUBA1    | P68370 | 11 (29)         | Cytoskeletal proteins and linkers/molecular motors |     | I    |
| Tubulin alpha-2 chain                                                         | TUBA2    | Q6P9V9 | 3 (7)           | Cytoskeletal proteins and linkers/molecular motors |     | I    |
| Tubulin alpha-6 chain                                                         | TUBA6    | Q6AYZ1 | 1 (1)           | Cytoskeletal proteins and linkers/molecular motors |     | I    |
| Tubulin beta chain                                                            |          | P04691 | 3 (10)          | Cytoskeletal proteins and linkers/molecular motors |     | I    |
| Tubulointerstitial nephritis antigen-like precursor                           | TINAGL1  | Q9EQT5 | 1 (3)           | Secreted proteins                                  |     | P    |
| Ubiquinol-cytochrome c reductase iron-sulfur subunit, mitochondrial precursor | UQCRFS1  | P20788 | 1 (1)           | Metabolism proteins                                |     | I    |

|                                                                                  |          |        |                    |                                                    |     |            |
|----------------------------------------------------------------------------------|----------|--------|--------------------|----------------------------------------------------|-----|------------|
| Ubiquinol-cytochrome-c reductase complex core protein 2, mitochondrial precursor | UQCRC2   | P32551 | 10 (26)            | Metabolism proteins                                |     | I          |
| Ubiquitin                                                                        | RPS27A   | P62989 | 4 (23),<br>1 (9)   | Protein degradation pathway                        |     | P, I       |
| Unc-13 homolog D                                                                 | UNC13D   | Q9R189 | 2 (3)              | Membrane trafficking proteins                      |     | P          |
| Uromodulin precursor                                                             | UMOD     | P27590 | 1 (1)              | Miscellaneous proteins                             | GPI | P          |
| Vacuolar ATP synthase subunit B, brain isoform                                   | ATP6V1B2 | P62815 | 2 (2)              | Metabolism proteins                                |     | I          |
| Versican core protein precursor                                                  | CSPG2    | Q9ERB4 | 2 (2)              | Secreted proteins                                  |     | P          |
| Vesicle-associated membrane protein-associated protein A                         | VAPA     | Q9Z270 | 1 (1)              | Membrane trafficking proteins                      | II  | I (RT-PCR) |
| Vimentin                                                                         | VIM      | P31000 | 39 (230),<br>2 (2) | Cytoskeletal proteins and linkers/molecular motors |     | P, I       |
| Voltage-dependent anion-selective channel protein 1                              | VDAC1    | Q9Z2L0 | 7 (23),<br>4 (5)   | Transporters and channels                          | III | P, I       |
| Voltage-dependent anion-selective channel protein 2                              | VDAC2    | P81155 | 11 (46),<br>4 (8)  | Transporters and channels                          | III | P, I       |

a, Number of peptides identified with their total hit number in the parenthesis; b, Collecting duct database (CDDb) family group names; c, Membrane protein types: I, one membrane spanning helix with an extracellular N'-terminus; II, one membrane spanning helix with an extracellular C'-terminus; III, multiple membrane spanning helices; GPI, glycosylphosphatidylinositol-linked; d, Protein identified in perfusion (P) and/or incubation (I) biotinylation method. Identifications confirmed by RT-PCR are indicated.
